# Supplementary material for: The Periplasmic Oxidoreductase DsbA Is Required for Virulence of the Phytopathogen Dickeya solani
Source: MDPI journal article supplement (doi:10.3390/ijms23020697), 2022-01-09
Supplement: s1 [file s1]

| Index | UniProt ID | Name/Description                                                      | p-value | Fold Change |
|-------|------------|-----------------------------------------------------------------------|---------|-------------|
| 1     | A0A6N0ARG9 | Outer membrane protein F                                              | 0,00044 | 0,70945     |
| 2     | A0A6N0ALD5 | Glutamate synthase [NADPH] large chain                                | 0,00279 | 0,52319     |
| 3     | A0A6N0AV44 | DNA-directed RNA polymerase subunit beta                              | 0,03857 | 1,53782     |
| 4     | A0A6N0AVZ8 | Glycerol kinase                                                       | 0,03661 | 0,67953     |
| 5     | A0A6N0AEN7 | Periplasmic oligopeptide-binding protein                              | 0,52052 | 1,11447     |
| 6     | A0A6N0AA30 | Putative hemoglobin and hemoglobin-haptoglobin-binding protein 2      | 0,00015 | 0,72270     |
| 7     | A0A6N0B4R5 | Pyruvate dehydrogenase E1 component                                   | 0,00021 | 0,50100     |
| 8     | A0A6N0A6S9 | DNA-directed RNA polymerase subunit beta                              | 0,29197 | 1,07288     |
| 9     | A0A6N0ANI6 | 60 kDa chaperonin                                                     | 0,00024 | 1,51814     |
| 10    | A0A6N0AAN4 | Ferric aerobactin receptor                                            | 0,02435 | 0,78441     |
| 11    | A0A6N0BBH7 | Uncharacterized protein                                               | 0,00001 | 0,38685     |
| 12    | A0A6N0AIL9 | Carbamoyl-phosphate synthase large chain                              | 0,20879 | 1,13651     |
| 13    | A0A6N0AJI3 | Elongation factor G                                                   | 0,87347 | 0,96834     |
| 14    | A0A6N0BKU6 | Chaperone protein DnaK                                                | 0,00013 | 1,33967     |
| 15    | A0A6N0AHU9 | Periplasmic dipeptide transport protein                               | 0,00012 | 0,74742     |
| 16    | A0A6N0BJS7 | Ketol-acid reductoisomerase                                           | 0,00004 | 0,63541     |
| 17    | A0A6N0AH33 | Flagellar hook-associated protein 1                                   | 0,00000 | 0,03236     |
| 18    | A0A6N0AUU7 | Transketolase 1                                                       | 0,00000 | 2,25714     |
| 19    | A0A6N0BM05 | Vitamin B12 transporter BtuB                                          | 0,01353 | 0,88445     |
| 20    | A0A6N0BE12 | Glyceraldehyde-3-phosphate dehydrogenase A                            | 0,00570 | 1,68697     |
| 21    | A0A6N0ABI9 | Formate acetyltransferase 1                                           | 0,20928 | 1,25748     |
| 22    | A0A6N0AG83 | Flagellin 1                                                           | 0,00000 | 0,02905     |
| 23    | A0A6N0B8D8 | Glycerophosphoryl diester phosphodiesterase                           | 0,00013 | 1,52904     |
| 24    | A0A6N0ABM2 | 30S ribosomal protein S1                                              | 0,23498 | 0,75887     |
| 25    | A0A6N0AMD5 | Polyribonucleotide nucleotidyltransferase                             | 0,00749 | 1,47355     |
| 26    | A0A6N0AF73 | Isocitrate dehydrogenase [NADP]                                       | 0,00033 | 0,68665     |
| 27    | A0A6N0BHM0 | Aerobic glycerol-3-phosphate dehydrogenase                            | 0,00415 | 1,15384     |
| 28    | A0A6N0B4P0 | Phosphoenolpyruvate synthase                                          | 0,00297 | 0,52008     |
| 29    | A0A6N0BFA5 | Outer membrane protein A                                              | 0,00000 | 2,67030     |
| 30    | A0A6N0AIR3 | Phosphoglycerate kinase                                               | 0,18998 | 1,19835     |
| 31    | A0A6N0BBA1 | 5-methyltetrahydropteroyltriglutamate--homocysteine methyltransferase | 0,00002 | 0,29804     |
| 32    | A0A6N0AI53 | ATP synthase subunit alpha                                            | 0,01342 | 1,28677     |
| 33    | A0A6N0ASL9 | Flagellar hook-associated protein 2                                   | 0,00000 | 0,02011     |
| 34    | A0A6N0B1Z2 | Pyruvate kinase II                                                    | 0,00000 | 2,34597     |
| 35    | A0A6N0A9K7 | Protein TolB                                                          | 0,03310 | 1,48324     |
| 36    | A0A6N0BAJ7 | Oligopeptidase A                                                      | 0,00345 | 0,45297     |
| 37    | A0A6N0B2Y4 | Ferrichrome-iron receptor                                             | 0,00001 | 0,22106     |
| 38    | A0A6N0BB31 | Outer membrane protein assembly factor BamA                           | 0,00110 | 1,32176     |
| 39    | A0A6N0AV51 | 5-methyltetrahydropteroyltriglutamate--homocysteine methyltransferase | 0,00004 | 2,98251     |
| 40    | A0A6N0BHD7 | Phosphoribosylformylglycinamide synthase                              | 0,02687 | 0,74642     |
| 41    | A0A6N0B9R8 | ATP synthase subunit beta                                             | 0,41630 | 1,26286     |

|    |            |                                                              |         |         |
|----|------------|--------------------------------------------------------------|---------|---------|
| 42 | A0A6N0BAV5 | Periplasmic pH-dependent serine endoprotease DegQ            | 0,00013 | 2,09866 |
| 43 | A0A6N0AD88 | Citrate synthase                                             | 0,05121 | 1,64349 |
| 44 | A0A6N0BCF9 | D-galactose-binding periplasmic protein                      | 0,00096 | 1,43916 |
| 45 | A0A6N0AGH9 | Aminopeptidase N                                             | 0,42192 | 0,88079 |
| 46 | A0A6N0ANU7 | Trigger factor                                               | 0,00048 | 2,05102 |
| 47 | A0A6N0BI17 | Enolase                                                      | 0,73327 | 0,90678 |
| 48 | A0A6N0AGF6 | Vitamin B12-binding protein                                  | 0,00041 | 0,52924 |
| 49 | A0A6N0AN74 | Phosphoserine aminotransferase                               | 0,00009 | 1,86363 |
| 50 | A0A6N0A9V6 | Glutathione-binding protein GsiB                             | 0,00179 | 1,43942 |
| 51 | A0A6N0BB30 | Outer membrane protein TolC                                  | 0,85655 | 1,01253 |
| 52 | A0A6N0BMC3 | S-adenosylmethionine synthase                                | 0,98246 | 1,00125 |
| 53 | A0A6N0AJT5 | Uncharacterized protein                                      | 0,00001 | 0,03310 |
| 54 | A0A6N0AXP2 | Transaldolase B                                              | 0,93931 | 0,99655 |
| 55 | A0A6N0AKK0 | Glutamine synthetase                                         | 0,00158 | 0,86072 |
| 56 | A0A6N0ADU3 | Aspartate aminotransferase                                   | 0,00012 | 0,68783 |
| 57 | A0A6N0B307 | Glucose-6-phosphate 1-dehydrogenase                          | 0,00012 | 2,93070 |
| 58 | A0A6N0B6V8 | Outer membrane protein F                                     | 0,00504 | 0,58453 |
| 59 | A0A6N0BNN1 | Leu/Ile/Val-binding protein                                  | 0,00704 | 0,57790 |
| 60 | A0A6N0AX80 | Phosphate-binding protein PstS                               | 0,00020 | 2,02199 |
| 61 | A0A6N0AIK9 | Chaperone protein ClpB                                       | 0,02107 | 0,56235 |
| 62 | A0A6N0BMR8 | Phosphoenolpyruvate carboxykinase [ATP]                      | 0,02504 | 1,16195 |
| 63 | A0A6N0ATR5 | Sulfite reductase [NADPH] hemoprotein beta-component         | 0,00336 | 1,42255 |
| 64 | A0A6N0AZ67 | Elongation factor Ts                                         | 0,62407 | 1,04424 |
| 65 | A0A6N0AME6 | Chaperone protein HtpG                                       | 0,01480 | 1,56737 |
| 66 | A0A6N0ADG0 | Glucans biosynthesis protein G                               | 0,00004 | 1,74159 |
| 67 | A0A6N0B8C1 | Chaperone SurA                                               | 0,00030 | 1,72947 |
| 68 | A0A6N0AAL1 | 6-phosphogluconate dehydrogenase, decarboxylating            | 0,00160 | 1,29617 |
| 69 | A0A6N0B4D0 | Periplasmic oligopeptide-binding protein                     | 0,03677 | 1,08402 |
| 70 | A0A6N0ACH9 | Iron uptake system component EfeO                            | 0,00010 | 0,37418 |
| 71 | A0A6N0AY33 | Uronate isomerase                                            | 0,99509 | 1,00284 |
| 72 | A0A6N0AVI0 | Cytosol aminopeptidase                                       | 0,00007 | 3,22370 |
| 73 | A0A6N0ASH5 | Aconitate hydratase 2                                        | 0,17617 | 1,37243 |
| 74 | A0A6N0AI32 | 2',3'-cyclic-nucleotide 2'-phosphodiesterase/3'-nucleotidase | 0,00102 | 1,28016 |
| 75 | A0A6N0BC61 | Phosphoenolpyruvate-protein phosphotransferase               | 0,00054 | 1,93401 |
| 76 | A0A6N0BDZ0 | Pyruvate kinase I                                            | 0,00009 | 1,66240 |
| 77 | A0A6N0BIA0 | Serine hydroxymethyltransferase                              | 0,18334 | 1,41042 |
| 78 | A0A6N0A8R2 | Penicillin-binding protein activator LpoA                    | 0,01343 | 1,18827 |
| 79 | A0A6N0BFC9 | ABC transporter substrate-binding protein YesO               | 0,07658 | 0,92720 |
| 80 | A0A2K8VVV2 | Phosphate acetyltransferase                                  | 0,00005 | 1,92334 |
| 81 | A0A6N0B6A4 | Uncharacterized protein                                      | 0,00001 | 1,94663 |
| 82 | A0A6N0B776 | Dihydrolipoyl dehydrogenase                                  | 0,14617 | 0,78455 |
| 83 | A0A6N0B698 | Pectinesterase A                                             | 0,00000 | 0,15439 |
| 84 | A0A6N0AF95 | Periplasmic serine endoprotease DegP                         | 0,00013 | 3,85071 |
| 85 | A0A6N0AQD6 | Glutamate/aspartate periplasmic-binding protein              | 0,00061 | 0,79791 |

|     |            |                                                           |         |         |
|-----|------------|-----------------------------------------------------------|---------|---------|
| 86  | A0A6N0ARJ8 | Sulfate-binding protein                                   | 0,00030 | 2,18138 |
| 87  | A0A6N0A824 | Argininosuccinate synthase                                | 0,06678 | 0,65185 |
| 88  | A0A6N0BEK9 | Fe(3+)-binding periplasmic protein                        | 0,09655 | 0,93353 |
| 89  | A0A6N0ABE3 | Uncharacterized protein                                   | 0,54392 | 1,02042 |
| 90  | A0A6N0BAU3 | Cysteine synthase A                                       | 0,00012 | 1,51117 |
| 91  | A0A6N0BBU2 | Periplasmic dipeptide transport protein                   | 0,11524 | 0,84749 |
| 92  | A0A6N0BCA4 | Uncharacterized protein                                   | 0,02670 | 1,26481 |
| 93  | A0A6N0BHM4 | Lysine-arginine-ornithine-binding periplasmic protein     | 0,34383 | 1,11343 |
| 94  | A0A6N0BAF6 | Mannan endo-1,4-beta-mannosidase                          | 0,00000 | 0,14331 |
| 95  | A0A6N0BBY6 | Putrescine-binding periplasmic protein                    | 0,08121 | 0,86991 |
| 96  | A0A6N0BEU4 | Long-chain fatty acid transport protein                   | 0,01157 | 0,72152 |
| 97  | A0A6N0B5T1 | Uncharacterized protein                                   | 0,00000 | 0,01166 |
| 98  | A0A6N0AEA4 | Pectate lyase A                                           | 0,00000 | 0,01184 |
| 99  | A0A6N0AW53 | Uncharacterized protein                                   | 0,00013 | 1,49417 |
| 100 | A0A6N0B8Q9 | Bifunctional purine biosynthesis protein PurH             | 0,00083 | 3,03472 |
| 101 | A0A6N0ANC2 | Pectate lyase L                                           | 0,00000 | 0,02552 |
| 102 | A0A6N0AE52 | Adenylosuccinate lyase                                    | 0,87382 | 1,01124 |
| 103 | A0A6N0AL83 | DNA gyrase subunit A                                      | 0,00181 | 2,89424 |
| 104 | A0A6N0BJ90 | Pectate lyase C                                           | 0,00001 | 0,02266 |
| 105 | A0A6N0BEF2 | Endoglucanase Z                                           | 0,00000 | 0,02551 |
| 106 | A0A6N0AJK1 | Aspartate ammonia-lyase                                   | 0,03633 | 0,74860 |
| 107 | A0A6N0AAE7 | Phosphoglucomutase                                        | 0,00005 | 1,64377 |
| 108 | A0A2K8VTD8 | Arginine--tRNA ligase                                     | 0,00007 | 3,05139 |
| 109 | A0A6N0B672 | Outer membrane protein assembly factor BamB               | 0,00009 | 1,77151 |
| 110 | A0A6N0AJK7 | Aspartate-semialdehyde dehydrogenase                      | 0,15512 | 0,82089 |
| 111 | A0A6N0ARF7 | Pectate lyase E                                           | 0,00000 | 0,01809 |
| 112 | A0A6N0AQA3 | Outer membrane protein assembly factor BamC               | 0,00073 | 1,66593 |
| 113 | A0A6N0ALM2 | Uncharacterized protein                                   | 0,03820 | 1,19949 |
| 114 | A0A6N0ACI6 | Ribose-phosphate pyrophosphokinase                        | 0,00245 | 2,31775 |
| 115 | A0A6N0B1L8 | Putative periplasmic iron-binding protein                 | 0,16663 | 0,93383 |
| 116 | A0A6N0AL81 | Uncharacterized protein                                   | 0,11071 | 1,69113 |
| 117 | A0A6N0B712 | DNA-directed RNA polymerase subunit alpha                 | 0,00004 | 2,04901 |
| 118 | A0A6N0APB6 | Succinyl-CoA ligase [ADP-forming] subunit beta            | 0,00597 | 1,88985 |
| 119 | A0A6N0BGT3 | Uncharacterized protein                                   | 0,00000 | 0,04035 |
| 120 | A0A6N0BES5 | 2,3-bisphosphoglycerate-dependent phosphoglycerate mutase | 0,32501 | 1,02335 |
| 121 | A0A6N0AIL4 | Putative amino-acid ABC transporter-binding protein       | 0,03925 | 1,68009 |
| 122 | A0A6N0B818 | Fructose-bisphosphate aldolase class 2                    | 0,00001 | 0,46782 |
| 123 | A0A6N0BBN5 | Trifunctional nucleotide phosphoesterase protein YfkN     | 0,07358 | 1,11001 |
| 124 | A0A6N0B8G8 | D-ribose-binding periplasmic protein                      | 0,01083 | 1,25106 |
| 125 | A0A6N0ARJ9 | L-arabinose-binding periplasmic protein                   | 0,00023 | 2,13653 |
| 126 | A0A6N0A6E0 | Superoxide dismutase [Mn]                                 | 0,01780 | 0,85279 |
| 127 | A0A6N0AVH0 | Threonine synthase                                        | 0,00019 | 1,85779 |
| 128 | A0A6N0AD51 | Leucine--tRNA ligase                                      | 0,85259 | 1,04075 |
| 129 | A0A6N0AYX3 | Malate dehydrogenase                                      | 0,03871 | 0,60672 |
| 130 | A0A6N0B1Z5 | Major phosphate-irrepressible acid phosphatase            | 0,00474 | 0,63899 |
| 131 | A0A6N0B8P1 | Triosephosphate isomerase                                 | 0,00070 | 1,37997 |

|     |            |                                                       |         |          |
|-----|------------|-------------------------------------------------------|---------|----------|
| 132 | A0A6N0A8Q4 | Glutamate synthase [NADPH] small chain                | 0,49606 | 0,69635  |
| 133 | A0A6N0AL00 | 3-carboxy-cis,cis-muconate cycloisomerase             | 0,67415 | 0,78621  |
| 134 | A0A6N0AH90 | Uncharacterized protein                               | 0,16046 | 0,47176  |
| 135 | A0A6N0AE83 | Uncharacterized protein                               | 0,00005 | 0,08753  |
| 136 | A0A6N0AT47 | Glucose-6-phosphate isomerase                         | 0,02271 | 1,16105  |
| 137 | A0A6N0AT12 | Peptidase B OS=Dickeya solani                         | 0,00467 | 1,65743  |
| 138 | A0A6N0AHF5 | 50S ribosomal protein L5                              | 0,23747 | 1,49892  |
| 139 | A0A6N0A9I2 | Ferrichrome-iron receptor                             | 0,29532 | 0,95220  |
| 140 | A0A6N0AYD1 | Uncharacterized protein                               | 0,02037 | 2,05184  |
| 141 | A0A6N0ADN0 | Glutamine-binding periplasmic protein                 | 0,00157 | 0,73643  |
| 142 | A0A6N0AY64 | Spheroplast protein Y                                 | 0,00000 | 11,35961 |
| 143 | A0A6N0BFC7 | Vitamin B12-binding protein                           | 0,00002 | 0,38407  |
| 144 | A0A6N0AIJ2 | 3-isopropylmalate dehydrogenase                       | 0,01753 | 0,79548  |
| 145 | A0A6N0B591 | 3-oxoacyl-[acyl-carrier-protein] synthase 1           | 0,00591 | 1,09492  |
| 146 | A0A6N0B031 | 50S ribosomal protein L1                              | 0,00873 | 1,29226  |
| 147 | A0A6N0BLK7 | 2-hydroxy-3-oxopropionate reductase                   | 0,23747 | 1,13073  |
| 148 | A0A6N0AIU7 | Carbamoyl-phosphate synthase small chain              | 0,00282 | 1,44365  |
| 149 | A0A6N0AI34 | Inorganic pyrophosphatase                             | 0,00186 | 1,35488  |
| 150 | A0A6N0AN25 | Valine--tRNA ligase                                   | 0,00072 | 3,20859  |
| 151 | A0A6N0ASY5 | Adenylosuccinate synthetase                           | 0,00791 | 1,35481  |
| 152 | A0A6N0BGV2 | Periplasmic beta-glucosidase                          | 0,02725 | 1,96385  |
| 153 | A0A6N0AFA2 | Uncharacterized protein                               | 0,00011 | 2,71298  |
| 154 | A0A6N0AVV3 | Uncharacterized protein                               | 0,07958 | 1,83497  |
| 155 | A0A6N0AG29 | Phenylalanine--tRNA ligase beta subunit               | 0,01168 | 1,98555  |
| 156 | A0A6N0B9F4 | General L-amino acid-binding periplasmic protein AapJ | 0,00225 | 0,73859  |
| 157 | A0A6N0BIQ5 | 50S ribosomal protein L2                              | 0,01108 | 0,77196  |
| 158 | A0A6N0A8I6 | NADP-dependent malic enzyme                           | 0,85246 | 0,95246  |
| 159 | A0A6N0ADS1 | Gamma-glutamyltranspeptidase                          | 0,00005 | 0,15474  |
| 160 | A0A6N0ACU7 | Mannose-6-phosphate isomerase                         | 0,00183 | 4,53431  |
| 161 | A0A6N0AFV0 | Uncharacterized protein                               | 0,00690 | 0,01895  |
| 162 | A0A2K8VTS7 | Putative cellulase                                    | 0,00002 | 0,04015  |
| 163 | A0A6N0B7G9 | Xaa-Pro dipeptidase                                   | 0,00035 | 1,79778  |
| 164 | A0A6N0BIQ6 | Phosphomannomutase/phosphoglucomutase                 | 0,00014 | 2,49935  |
| 165 | A0A6N0BCR8 | Diaminobutyrate--2-oxoglutarate aminotransferase      | 0,05166 | 0,58813  |
| 166 | A0A6N0AX16 | Glutathione-binding protein GsiB                      | 0,02530 | 1,30074  |
| 167 | A0A6N0ADK6 | Flagellar hook-associated protein 3                   | 0,00000 | 0,04578  |
| 168 | A0A6N0AV63 | Argininosuccinate lyase                               | 0,01191 | 0,72950  |
| 169 | A0A6N0B974 | 6-phosphofructokinase isozyme 1                       | 0,00097 | 2,11043  |
| 170 | A0A6N0BBW4 | Pectin lyase                                          | 0,00001 | 0,04080  |
| 171 | A0A6N0AGQ9 | FKBP-type peptidyl-prolyl cis-trans isomerase FkpA    | 0,05775 | 1,14254  |
| 172 | A0A6N0AGA6 | Uncharacterized protein                               | 0,20103 | 0,71541  |
| 173 | A0A6N0A6Y4 | Uncharacterized protein                               | 0,00821 | 1,33347  |
| 174 | A0A6N0ARC9 | Uncharacterized protein                               | 0,00001 | 0,17854  |
| 175 | A0A6N0API8 | 2-hydroxypropyl-CoM lyase                             | 0,25363 | 0,67544  |
| 176 | A0A6N0AJ09 | Cystine-binding periplasmic protein                   | 0,00128 | 2,33367  |
| 177 | A0A6N0B1V3 | NADPH dehydrogenase                                   | 0,00044 | 6,09196  |
| 178 | A0A6N0AFN4 | Putative oxidoreductase YdgJ                          | 0,00044 | 3,41152  |

|     |            |                                                                    |         |         |
|-----|------------|--------------------------------------------------------------------|---------|---------|
| 179 | A0A6N0B4U8 | Flagellar hook-length control protein                              | 0,00130 | 0,02556 |
| 180 | A0A6N0AIR5 | Osmotically-inducible protein Y                                    | 0,00000 | 2,44137 |
| 181 | A0A6N0ADT1 | Lysine-arginine-ornithine-binding periplasmic protein              | 0,00102 | 0,88497 |
| 182 | A0A6N0B2P8 | Uncharacterized protein                                            | 0,00014 | 1,76840 |
| 183 | A0A6N0AGC2 | Negative regulator of flagellin synthesis                          | 0,00000 | 0,02378 |
| 184 | A0A6N0AGR8 | 30S ribosomal protein S4                                           | 0,00009 | 1,63237 |
| 185 | A0A6N0BBS5 | Outer membrane protein X                                           | 0,11278 | 1,11250 |
| 186 | A0A6N0AIZ0 | 50S ribosomal protein L7/L12                                       | 0,00001 | 0,34736 |
| 187 | A0A6N0AC21 | Asparagine synthetase B [glutamine-hydrolyzing]                    | 0,43601 | 0,30249 |
| 188 | A0A6N0ADW9 | Histidinol-phosphate aminotransferase                              | 0,00797 | 2,28204 |
| 189 | A0A6N0BJB5 | GMP synthase [glutamine-hydrolyzing]                               | 0,21094 | 1,35247 |
| 190 | A0A6N0ABD6 | ABC transporter arginine-binding protein 2                         | 0,00009 | 2,12469 |
| 191 | A0A6N0AKS4 | Putative peroxiredoxin                                             | 0,00028 | 1,58675 |
| 192 | A0A6N0AZN5 | Cystine-binding periplasmic protein                                | 0,00010 | 0,49364 |
| 193 | A0A6N0AW17 | Uncharacterized protein                                            | 0,03653 | 0,67517 |
| 194 | A0A6N0AKD8 | Thiol:disulfide interchange protein DsbA                           | 0,00002 | 0,50583 |
| 195 | A0A6N0AUB8 | Enoyl-[acyl-carrier-protein] reductase [NADH] FabI                 | 0,45218 | 0,91920 |
| 196 | A0A6N0BGD8 | Oligogalacturonate-specific porin KdgM                             | 0,15384 | 1,14770 |
| 197 | A0A6N0B831 | 50S ribosomal protein L4                                           | 0,57136 | 1,28709 |
| 198 | A0A6N0B651 | Exo-poly-alpha-D-galacturonosidase                                 | 0,00027 | 0,12796 |
| 199 | A0A6N0AIX9 | ATP synthase gamma chain                                           | 0,69215 | 1,06854 |
| 200 | A0A6N0BBN8 | Translation initiation factor IF-2                                 | 0,47932 | 0,83419 |
| 201 | A0A6N0AG11 | Tail-specific protease                                             | 0,00097 | 1,62489 |
| 202 | A0A6N0AYC1 | Peptidoglycan-associated lipoprotein                               | 0,00031 | 1,50498 |
| 203 | A0A6N0BBU3 | 4-hydroxy-tetrahydrodipicolinate synthase                          | 0,00515 | 1,32859 |
| 204 | A0A6N0AJ33 | Proline--tRNA ligase                                               | 0,00880 | 1,97441 |
| 205 | A0A6N0AKT8 | 2,3,4,5-tetrahydropyridine-2,6-dicarboxylate N-succinyltransferase | 0,00760 | 0,76426 |
| 206 | A0A6N0AMJ7 | Phosphopentomutase                                                 | 0,04791 | 1,52171 |
| 207 | A0A6N0BIX2 | Branched-chain-amino-acid aminotransferase                         | 0,00126 | 1,85915 |
| 208 | A0A6N0ARS9 | Protein RecA                                                       | 0,00056 | 2,38122 |
| 209 | A0A6N0ALN3 | Histidine-binding periplasmic protein                              | 0,00264 | 1,43639 |
| 210 | A0A6N0BAS1 | Ferrichrome-iron receptor                                          | 0,17972 | 0,77808 |
| 211 | A0A6N0BI02 | 50S ribosomal protein L9                                           | 0,78104 | 1,02108 |
| 212 | A0A6N0AJ23 | Glycine betaine-binding periplasmic protein                        | 0,00833 | 1,29512 |
| 213 | A0A6N0ARE9 | NAD(P)H nitroreductase YdjA                                        | 0,01451 | 5,20197 |
| 214 | A0A6N0A805 | Purine nucleoside phosphorylase DeoD-type                          | 0,34515 | 1,11907 |
| 215 | A0A6N0AU66 | Glutamate--tRNA ligase                                             | 0,76076 | 1,16056 |
| 216 | A0A6N0B8L0 | GDP-mannose 4,6-dehydratase                                        | 0,04102 | 0,68840 |
| 217 | A0A6N0AJL6 | Glucokinase                                                        | 0,01234 | 1,37244 |
| 218 | A0A6N0AJG1 | D-ribose-binding periplasmic protein                               | 0,00552 | 1,48139 |
| 219 | A0A6N0AWP5 | Cystathionine gamma-synthase                                       | 0,00391 | 1,12524 |
| 220 | A0A6N0AFN3 | Phage shock protein A                                              | 0,05404 | 1,26535 |
| 221 | A0A6N0BHZ7 | D-3-phosphoglycerate dehydrogenase                                 | 0,00004 | 0,12933 |
| 222 | A0A6N0B632 | General stress protein 69                                          | 0,00015 | 0,26867 |
| 223 | A0A6N0BEU3 | Uncharacterized protein                                            | 0,00051 | 0,05840 |
| 224 | A0A6N0A9X9 | Uncharacterized protein                                            | 0,29179 | 1,60722 |
| 225 | A0A6N0BIW1 | Murein hydrolase activator NlpD                                    | 0,05750 | 1,84012 |



|     |            |                                                                                                    |         |         |
|-----|------------|----------------------------------------------------------------------------------------------------|---------|---------|
| 226 | A0A6N0A9Y2 | Alkyl hydroperoxide reductase subunit C                                                            | 0,00001 | 8,47398 |
| 227 | A0A6N0ART2 | Asparagine--tRNA ligase                                                                            | 0,09226 | 0,67784 |
| 228 | A0A6N0BMB3 | 30S ribosomal protein S5                                                                           | 0,00008 | 1,58921 |
| 229 | A0A6N0BB99 | Putative L,D-transpeptidase YbiS                                                                   | 0,00027 | 3,88835 |
| 230 | A0A6N0AIN6 | Uncharacterized protein OS=Dickeya solani                                                          | 0,00000 | 0,07834 |
| 231 | A0A6N0AVE9 | 50S ribosomal protein L6                                                                           | 0,36193 | 0,94621 |
| 232 | A0A6N0A9J6 | LPS-assembly lipoprotein LptE                                                                      | 0,00208 | 2,05331 |
| 233 | A0A6N0ACV5 | Uncharacterized protein                                                                            | 0,00039 | 1,79183 |
| 234 | A0A6N0AXS3 | Uncharacterized protein                                                                            | 0,30887 | 1,05255 |
| 235 | A0A6N0AZU4 | D-methionine-binding lipoprotein MetQ                                                              | 0,00282 | 1,43592 |
| 236 | A0A6N0ASJ1 | Thioredoxin reductase                                                                              | 0,00065 | 3,23443 |
| 237 | A0A6N0AWY5 | Putative 2-keto-3-deoxy-galactonate aldolase YagE                                                  | 0,00028 | 4,61865 |
| 238 | A0A6N0AYR4 | Catalase-peroxidase                                                                                | 0,00639 | 1,91664 |
| 239 | A0A6N0BA21 | Glutamine--tRNA ligase                                                                             | 0,10664 | 1,23689 |
| 240 | A0A6N0ACS4 | Alcohol dehydrogenase 2                                                                            | 0,00195 | 1,51279 |
| 241 | A0A6N0AUY9 | Putative amino-acid-binding protein YxeM                                                           | 0,87164 | 1,07489 |
| 242 | A0A6N0ACS3 | Pectin degradation repressor protein KdgR                                                          | 0,00040 | 0,52169 |
| 243 | A0A6N0B8V3 | Acetyl-coenzyme A synthetase                                                                       | 0,94653 | 0,96267 |
| 244 | A0A6N0A8J4 | Uncharacterized protein                                                                            | 0,03091 | 0,87009 |
| 245 | A0A6N0B8V4 | Multiple sugar-binding protein                                                                     | 0,03779 | 1,23375 |
| 246 | A0A6N0AXW9 | 50S ribosomal protein L10                                                                          | 0,00011 | 0,52239 |
| 247 | A0A6N0AQQ9 | Aspartate--tRNA ligase                                                                             | 0,01125 | 2,36257 |
| 248 | A0A6N0ARF6 | DNA-binding protein H-NS                                                                           | 0,27952 | 1,15427 |
| 249 | A0A6N0AGF3 | Isoleucine--tRNA ligase                                                                            | 0,00031 | 2,93941 |
| 250 | A0A6N0AXG5 | 30S ribosomal protein S2                                                                           | 0,00210 | 1,23463 |
| 251 | A0A6N0BHE7 | 2-oxoglutaminate amidase                                                                           | 0,00212 | 1,61565 |
| 252 | A0A6N0AHH6 | Outer membrane protein assembly factor BamD                                                        | 0,02623 | 1,45964 |
| 253 | A0A6N0AFL4 | Tryptophan biosynthesis protein TrpCF                                                              | 0,02756 | 3,67574 |
| 254 | A0A6N0AKW2 | LOG family protein YgdH                                                                            | 0,01004 | 0,70201 |
| 255 | A0A6N0AM92 | Microbial collagenase                                                                              | 0,00000 | 0,08182 |
| 256 | A0A6N0ADP3 | Fumarate hydratase class II                                                                        | 0,04544 | 1,67209 |
| 257 | A0A6N0BG99 | Nucleoid-associated protein YejK                                                                   | 0,00069 | 5,57445 |
| 258 | A0A6N0AF63 | 1-(5-phosphoribosyl)-5-[(5-phosphoribosylamino)methylideneamino] imidazole-4-carboxamide isomerase | 0,01303 | 0,52842 |
| 259 | A0A6N0AS90 | 4-hydroxy-tetrahydronicotinate synthase                                                            | 0,00047 | 2,16165 |
| 260 | A0A6N0B2V4 | 3-deoxy-manno-octulosonate cytidylyltransferase                                                    | 0,00010 | 3,14378 |
| 261 | A0A6N0ATA7 | 30S ribosomal protein S8                                                                           | 0,00083 | 0,49875 |
| 262 | A0A6N0B9Z7 | Osmotically-inducible protein Y                                                                    | 0,00006 | 3,95698 |
| 263 | A0A6N0AU95 | Glucose-1-phosphatase                                                                              | 0,48577 | 0,75441 |
| 264 | A0A6N0BH82 | Alanine--tRNA ligase                                                                               | 0,26088 | 0,76362 |
| 265 | A0A6N0BHP8 | Ferritin-1                                                                                         | 0,21912 | 2,33647 |
| 266 | A0A6N0A9R0 | Molybdate-binding periplasmic protein                                                              | 0,86961 | 1,01215 |
| 267 | A0A6N0AZK5 | Adenylate kinase                                                                                   | 0,00423 | 1,45919 |
| 268 | A0A6N0ASE7 | Soluble aldose sugar dehydrogenase YliI                                                            | 0,00362 | 2,51872 |
| 269 | A0A6N0BJ85 | 50S ribosomal protein L3                                                                           | 0,34639 | 1,09421 |
| 270 | A0A6N0AST7 | Putative quorum-quenching lactonase YtnP                                                           | 0,01057 | 1,58881 |
| 271 | A0A6N0A9K2 | Succinyl-CoA ligase [ADP-forming] subunit alpha                                                    | 0,16098 | 1,11586 |

|     |            |                                                          |         |         |
|-----|------------|----------------------------------------------------------|---------|---------|
| 272 | A0A6N0A8E0 | D-ribose-binding periplasmic protein                     | 0,00032 | 0,23966 |
| 273 | A0A6N0AJL8 | Tryptophan--tRNA ligase                                  | 0,04972 | 1,41421 |
| 274 | A0A6N0ARP5 | Glutamate--cysteine ligase                               | 0,25790 | 1,28752 |
| 275 | A0A6N0B1N9 | Outer-membrane lipoprotein carrier protein               | 0,00014 | 2,82181 |
| 276 | A0A6N0AVX9 | 30S ribosomal protein S3                                 | 0,00025 | 2,18359 |
| 277 | A0A6N0BK42 | Uncharacterized protein                                  | 0,00001 | 0,14930 |
| 278 | A0A6N0BCK0 | Transaldolase                                            | 0,17139 | 0,66760 |
| 279 | A0A6N0B2V1 | Flagellar hook protein FlgE                              | 0,00004 | 0,12960 |
| 280 | A0A6N0AC94 | Glucuronoxylanase XynC                                   | 0,00032 | 0,14457 |
| 281 | A0A6N0B5U1 | 4-hydroxy-tetrahydrodipicolinate reductase               | 0,15925 | 0,72037 |
| 282 | A0A6N0AJ59 | 30S ribosomal protein S9                                 | 0,00180 | 1,46560 |
| 283 | A0A6N0BIG4 | 30S ribosomal protein S7                                 | 0,90568 | 0,99303 |
| 284 | A0A6N0AYQ7 | Thiol:disulfide interchange protein DsbC                 | 0,45668 | 1,13887 |
| 285 | A0A6N0BJ22 | 50S ribosomal protein L15                                | 0,74415 | 1,06645 |
| 286 | A0A6N0AN19 | Hemin-binding periplasmic protein HmuT                   | 0,00222 | 0,44134 |
| 287 | A0A6N0ATI6 | Pectate lyase C                                          | 0,00000 | 0,04709 |
| 288 | A0A6N0B030 | Ribosome-recycling factor                                | 0,11378 | 0,67776 |
| 289 | A0A6N0AXM0 | Aspartate carbamoyltransferase                           | 0,49273 | 1,08862 |
| 290 | A0A6N0AI45 | Putative hydrolase YxeP                                  | 0,95314 | 1,00463 |
| 291 | A0A6N0AWX1 | Uncharacterized protein                                  | 0,00015 | 0,05906 |
| 292 | A0A6N0AAD4 | Putative phospholipid-binding protein MlaC               | 0,00007 | 0,48576 |
| 293 | A0A6N0B5N4 | 30S ribosomal protein S10                                | 0,00025 | 1,43126 |
| 294 | A0A6N0ABF6 | Serine--tRNA ligase                                      | 0,67328 | 1,27347 |
| 295 | A0A6N0B0F6 | Aldehyde-alcohol dehydrogenase                           | 0,15771 | 1,50719 |
| 296 | A0A6N0AU55 | Uncharacterized protein                                  | 0,05098 | 1,67331 |
| 297 | A0A6N0AU11 | Multiple stress resistance protein BhsA                  | 0,00000 | 4,17922 |
| 298 | A0A6N0AKW3 | Glutathione reductase                                    | 0,00160 | 1,18079 |
| 299 | A0A6N0AKM9 | ATP synthase subunit b                                   | 0,21257 | 0,55201 |
| 300 | A0A6N0ARC4 | Carbohydrate acetyl esterase/feruloyl esterase           | 0,19285 | 0,69622 |
| 301 | A0A6N0ANV8 | Phosphoribosylformylglycinamide cyclo-ligase             | 0,09077 | 0,33377 |
| 302 | A0A6N0BBM6 | 50S ribosomal protein L13                                | 0,00043 | 1,53829 |
| 303 | A0A6N0B4F8 | Lipoprotein E                                            | 0,00000 | 2,56440 |
| 304 | A0A6N0B2Q1 | KHG/KDPG aldolase                                        | 0,00574 | 1,62848 |
| 305 | A0A6N0AIQ5 | Stringent starvation protein A                           | 0,87145 | 1,01769 |
| 306 | A0A6N0A915 | N-acetyl-gamma-glutamyl-phosphate reductase              | 0,96880 | 0,98817 |
| 307 | A0A6N0AZR2 | Glucose-specific phosphotransferase enzyme IIA component | 0,00457 | 1,29751 |
| 308 | A0A6N0AC10 | MltA-interacting protein                                 | 0,37283 | 1,31909 |
| 309 | A0A6N0A7R6 | 50S ribosomal protein L11                                | 0,03381 | 0,85318 |
| 310 | A0A6N0APT0 | Thiol peroxidase                                         | 0,00541 | 1,49688 |
| 311 | A0A6N0AVZ9 | Exopolyphosphatase                                       | 0,07318 | 1,25306 |
| 312 | A0A6N0BEP3 | Hydrogen peroxide-inducible genes activator              | 0,00044 | 3,73220 |
| 313 | A0A6N0AA54 | Uncharacterized protein                                  | 0,11284 | 1,22583 |
| 314 | A0A6N0A8C2 | Carboxymethylenebutenolidase                             | 0,00001 | 3,48282 |
| 315 | A0A6N0BGU0 | 50S ribosomal protein L19                                | 0,00006 | 1,68418 |
| 316 | A0A6N0AJ86 | D-xylose-binding periplasmic protein                     | 0,03712 | 1,37127 |
| 317 | A0A6N0ADL9 | Flagellar basal body rod protein FlgB                    | 0,00056 | 0,09725 |
| 318 | A0A6N0BE41 | Uncharacterized protein                                  | 0,00026 | 1,40471 |

|     |            |                                                                                           |         |         |
|-----|------------|-------------------------------------------------------------------------------------------|---------|---------|
| 319 | A0A6N0B0S2 | Tryptophan synthase alpha chain                                                           | 0,00037 | 0,51136 |
| 320 | A0A6N0BJY9 | 50S ribosomal protein L24                                                                 | 0,10281 | 0,87814 |
| 321 | A0A6N0AZJ6 | ATP-dependent Clp protease proteolytic subunit                                            | 0,04426 | 1,45588 |
| 322 | A0A6N0AEA5 | 3-hydroxydecanoyl-[acyl-carrier-protein] dehydratase                                      | 0,04682 | 1,25582 |
| 323 | A0A6N0BIF8 | DNA polymerase I                                                                          | 0,00519 | 2,49629 |
| 324 | A0A6N0AKZ8 | Uridine phosphorylase                                                                     | 0,09096 | 1,46605 |
| 325 | A0A6N0B7F9 | Delta-aminolevulinic acid dehydratase                                                     | 0,88976 | 0,92742 |
| 326 | A0A6N0AT52 | Soluble cytochrome b562                                                                   | 0,00000 | 2,88676 |
| 327 | A0A2K8VSY6 | GTP cyclohydrolase 1                                                                      | 0,00002 | 2,03340 |
| 328 | A0A6N0A814 | Peptide chain release factor 2                                                            | 0,04575 | 2,92790 |
| 329 | A0A6N0AXE2 | Uncharacterized protein                                                                   | 0,36434 | 1,26360 |
| 330 | A0A6N0ARZ3 | Osmotically-inducible lipoprotein E                                                       | 0,00002 | 3,56791 |
| 331 | A0A6N0AAR5 | Uncharacterized protein                                                                   | 0,00014 | 0,19364 |
| 332 | A0A6N0BAC9 | Ornithine carbamoyltransferase chain I                                                    | 0,00480 | 0,67850 |
| 333 | A0A6N0B5D6 | Flagellar hook-basal body complex protein FlhE                                            | 0,00000 | 0,04203 |
| 334 | A0A6N0AG85 | Pectate lyase L                                                                           | 0,00168 | 0,01997 |
| 335 | A0A6N0BLC9 | Dihydrolipoyllysine-residue acetyltransferase component of pyruvate dehydrogenase complex | 0,06196 | 0,75263 |
| 336 | A0A6N0BK46 | D-methionine-binding lipoprotein MetQ                                                     | 0,23921 | 0,56588 |
| 337 | A0A6N0AH46 | Chemotaxis protein CheW                                                                   | 0,01684 | 0,42669 |
| 338 | A0A6N0AD72 | Flavodoxin                                                                                | 0,00817 | 0,79984 |
| 339 | A0A6N0B675 | FKBP-type 22 kDa peptidyl-prolyl cis-trans isomerase                                      | 0,00013 | 3,40269 |
| 340 | A0A6N0B8Y8 | Ribulokinase                                                                              | 0,03339 | 2,95298 |
| 341 | A0A6N0B547 | Flagellar basal-body rod protein FlgG                                                     | 0,00056 | 0,06641 |
| 342 | A0A6N0AQX1 | Integration host factor subunit alpha                                                     | 0,14134 | 1,34086 |
| 343 | A0A6N0AT13 | Carboxylesterase NlhH                                                                     | 0,00303 | 1,39112 |
| 344 | A0A6N0AUL3 | Putative periplasmic iron-binding protein                                                 | 0,00013 | 5,85462 |
| 345 | A0A6N0AT35 | DNA topoisomerase I                                                                       | 0,00158 | 6,59047 |
| 346 | A0A6N0AGS8 | S-ribosylhomocysteine lyase                                                               | 0,00124 | 0,68193 |
| 347 | A0A6N0AY12 | 10 kDa chaperonin                                                                         | 0,00825 | 0,72067 |
| 348 | A0A6N0AE66 | Putative phospholipid-binding lipoprotein MlaA                                            | 0,00000 | 2,11773 |
| 349 | A0A6N0AKD4 | Carboxymethylenebutenolidase                                                              | 0,00010 | 2,50028 |
| 350 | A0A6N0BKC3 | 30S ribosomal protein S6                                                                  | 0,00007 | 0,22263 |
| 351 | A0A6N0BHD6 | 50S ribosomal protein L22                                                                 | 0,00386 | 1,33068 |
| 352 | A0A6N0A9J2 | Uracil phosphoribosyltransferase                                                          | 0,32614 | 2,06481 |
| 353 | A0A6N0ASX1 | Biosynthetic arginine decarboxylase                                                       | 0,90696 | 0,93812 |
| 354 | A0A6N0AYE1 | Uncharacterized protein                                                                   | 0,00000 | 0,06999 |
| 355 | A0A6N0AQ29 | Putative transcriptional regulatory protein YebC                                          | 0,57939 | 1,22554 |
| 356 | A0A6N0AM80 | 50S ribosomal protein L21                                                                 | 0,09407 | 1,29016 |
| 357 | A0A6N0BEI8 | Chaperone protein Skp                                                                     | 0,10432 | 5,84120 |
| 358 | A0A6N0A9A8 | Nucleoid-associated protein YbaB                                                          | 0,91516 | 0,95361 |
| 359 | A0A6N0AJ43 | Enamine/imine deaminase                                                                   | 0,06139 | 0,62947 |
| 360 | A0A6N0AFS9 | 50S ribosomal protein L20                                                                 | 0,45766 | 0,95950 |
| 361 | A0A6N0AW18 | Periplasmic protein CpxP                                                                  | 0,00001 | 7,11139 |
| 362 | A0A6N0ANH5 | Uncharacterized protein                                                                   | 0,00129 | 2,02707 |
| 363 | A0A6N0ALX3 | Membrane-bound lytic murein transglycosylase C                                            | 0,00083 | 2,98744 |
| 364 | A0A6N0AKI9 | DNA-directed RNA polymerase subunit omega                                                 | 0,00644 | 0,33822 |



|     |            |                                                                                                   |         |         |
|-----|------------|---------------------------------------------------------------------------------------------------|---------|---------|
| 365 | A0A6N0AXL0 | Multidrug efflux pump subunit AcrA                                                                | 0,76665 | 1,48922 |
| 366 | A0A6N0BHR3 | Uncharacterized protein                                                                           | 0,00000 | 0,02435 |
| 367 | A0A6N0AEH1 | Uncharacterized protein                                                                           | 0,00009 | 2,37153 |
| 368 | A0A6N0B2K0 | Peptidyl-prolyl cis-trans isomerase D                                                             | 0,70751 | 0,89072 |
| 369 | A0A6N0BFR0 | 3-oxoacyl-[acyl-carrier-protein] reductase FabG                                                   | 0,89640 | 1,06225 |
| 370 | A0A6N0BHF7 | 6-phospho-beta-glucosidase GmuD                                                                   | 0,20028 | 0,89214 |
| 371 | A0A6N0ABA8 | Dihydrolipoyllysine-residue succinyltransferase component of 2-oxoglutarate dehydrogenase complex | 0,20662 | 1,69361 |
| 372 | A0A6N0ATH2 | Acetylornithine/succinyldiaminopimelate aminotransferase                                          | 0,03989 | 0,78571 |
| 373 | A0A6N0BGK3 | Nitrogen regulatory protein P-II                                                                  | 0,00078 | 1,57466 |
| 374 | A0A6N0ADF0 | Uncharacterized protein                                                                           | 0,04179 | 0,38197 |
| 375 | A0A6N0AEB7 | Arabinogalactan endo-1,4-beta-galactosidase                                                       | 0,00001 | 0,36077 |
| 376 | A0A6N0AH49 | Uncharacterized protein                                                                           | 0,36872 | 1,74291 |
| 377 | A0A6N0ADA6 | Outer membrane protein assembly factor BamD                                                       | 0,09290 | 0,72585 |
| 378 | A0A6N0BD87 | Rare lipoprotein A                                                                                | 0,96251 | 1,02018 |
| 379 | A0A6N0A8K8 | Biotin carboxyl carrier protein of acetyl-CoA carboxylase                                         | 0,00075 | 1,37792 |
| 380 | A0A6N0AJG4 | Single-stranded DNA-binding protein                                                               | 0,00001 | 1,69434 |
| 381 | A0A6N0AAG6 | 2-oxoglutarate dehydrogenase E1 component                                                         | 0,01183 | 1,52343 |
| 382 | A0A6N0B282 | Uncharacterized protein                                                                           | 0,02556 | 2,46922 |
| 383 | A0A6N0BBV4 | Cold shock-like protein CspE                                                                      | 0,00009 | 1,42579 |
| 384 | A0A6N0AXN1 | Homoserine O-acetyltransferase                                                                    | 0,17169 | 0,69841 |
| 385 | A0A6N0B7Z8 | Bifunctional aspartokinase/homoserine dehydrogenase 1                                             | 0,07715 | 1,59683 |
| 386 | A0A6N0B5T5 | Peptidyl-prolyl cis-trans isomerase A                                                             | 0,00000 | 2,92175 |
| 387 | A0A6N0BH40 | RNA-binding protein Hfq                                                                           | 0,26042 | 0,58007 |
| 388 | A0A6N0B2A0 | Uridylate kinase                                                                                  | 0,00113 | 1,14465 |
| 389 | A0A6N0AVB9 | 30S ribosomal protein S13                                                                         | 0,00018 | 0,56456 |
| 390 | A0A6N0AK09 | Ribosome-binding factor A                                                                         | 0,01581 | 0,46461 |
| 391 | A0A6N0BFR1 | Flagellar basal-body rod protein FlgF                                                             | 0,00002 | 0,12407 |
| 392 | A0A6N0B1Y5 | Imidazole glycerol phosphate synthase subunit HisF                                                | 0,33560 | 1,40108 |
| 393 | A0A6N0BCD2 | Uncharacterized protein                                                                           | 0,00151 | 2,99785 |
| 394 | A0A6N0ANX1 | Phosphoribosylaminoimidazole-succinocarboxamide synthase                                          | 0,08262 | 1,25701 |
| 395 | A0A6N0AUY7 | Homoserine kinase                                                                                 | 0,00002 | 3,39501 |
| 396 | A0A6N0A9L8 | Cation efflux system protein CusB                                                                 | 0,40915 | 0,62992 |
| 397 | A0A6N0AT23 | Malonyl CoA-acyl carrier protein transacylase                                                     | 0,30297 | 1,79475 |
| 398 | A0A6N0B5T6 | Gamma-glutamyl phosphate reductase                                                                | 0,22182 | 1,21666 |
| 399 | A0A6N0AHP1 | Nucleoside diphosphate kinase                                                                     | 0,03918 | 1,56899 |
| 400 | A0A6N0AXR2 | N utilization substance protein B                                                                 | 0,00186 | 2,16978 |
| 401 | A0A6N0ANQ1 | Uncharacterized protein                                                                           | 0,00011 | 3,12322 |
| 402 | A0A6N0ABY0 | Tryptophan synthase beta chain                                                                    | 0,37033 | 1,04298 |
| 403 | A0A6N0ADK4 | Outer membrane protein W                                                                          | 0,00021 | 0,57689 |
| 404 | A0A6N0AU32 | Methylglyoxal synthase                                                                            | 0,71549 | 0,83193 |
| 405 | A0A6N0BG77 | Oligopeptide-binding protein AppA                                                                 | 0,10420 | 1,94230 |
| 406 | A0A6N0B5V4 | Disulfide-bond oxidoreductase YfcG                                                                | 0,03705 | 1,81033 |

|     |            |                                                       |         |         |
|-----|------------|-------------------------------------------------------|---------|---------|
| 407 | A0A6N0ASW1 | Ribose-5-phosphate isomerase A                        | 0,00673 | 0,75016 |
| 408 | A0A6N0BHB7 | 50S ribosomal protein L17                             | 0,00326 | 1,50742 |
| 409 | A0A6N0B3F6 | Superoxide dismutase [Cu-Zn] 1                        | 0,02573 | 1,10999 |
| 410 | A0A2K8VYT1 | 30S ribosomal protein S11                             | 0,92745 | 0,97647 |
| 411 | A0A6N0AWD5 | 30S ribosomal protein S21                             | 0,00006 | 1,28532 |
| 412 | A0A6N0AY10 | 2,5-diketo-D-gluconic acid reductase A                | 0,15076 | 1,27694 |
| 413 | A0A6N0B762 | Flagellar basal-body rod protein FlgC                 | 0,00002 | 0,28024 |
| 414 | A0A6N0AG71 | 2-C-methyl-D-erythritol 2,4-cyclodiphosphate synthase | 0,08142 | 1,38156 |
| 415 | A0A6N0BH43 | Carbonic anhydrase 2                                  | 0,49943 | 1,17565 |
| 416 | A0A6N0ABU4 | Glucose-6-phosphate 1-epimerase                       | 0,05059 | 1,77089 |
| 417 | A0A6N0ADB9 | Cation efflux system protein CusF                     | 0,01174 | 1,39430 |
| 418 | A0A6N0AH26 | Shikimate kinase 1                                    | 0,00069 | 1,39990 |
| 419 | A0A6N0B8S8 | Biotin carboxylase                                    | 0,29982 | 0,59034 |
| 420 | A0A6N0AG15 | Cold shock-like protein CspC                          | 0,10809 | 0,47867 |
| 421 | A0A6N0ASG6 | 4-hydroxythreonine-4-phosphate dehydrogenase 2        | 0,04148 | 1,61519 |
| 422 | A0A6N0AF60 | Oligogalacturonate-specific porin KdgM                | 0,22385 | 0,72943 |
| 423 | A0A2K8VTW3 | Uncharacterized protein                               | 0,00038 | 0,53703 |
| 424 | A0A6N0BEV9 | Lon protease                                          | 0,12757 | 0,29072 |
| 425 | A0A6N0BBK2 | Uncharacterized protein                               | 0,00114 | 0,58423 |
| 426 | A0A6N0B2L1 | Serralysin A                                          | 0,03637 | 0,36631 |
| 427 | A0A6N0AYV6 | Agmatine deiminase                                    | 0,03397 | 1,91425 |
| 428 | A0A6N0B6W9 | Aerobic respiration control protein ArcA              | 0,14255 | 1,39761 |
| 429 | A0A6N0AV71 | Uncharacterized protein                               | 0,01590 | 0,57975 |
| 430 | A0A6N0AA80 | DNA-binding protein HU-alpha                          | 0,01157 | 0,35061 |
| 431 | A0A6N0BG78 | Acyl carrier protein                                  | 0,49659 | 1,44139 |
| 432 | A0A6N0BMC4 | 50S ribosomal protein L16                             | 0,00091 | 1,62097 |
| 433 | A0A6N0BJQ1 | Uncharacterized protein                               | 0,00000 | 0,00792 |
| 434 | A0A6N0AL97 | N-carbamoyl-D-amino acid hydrolase                    | 0,51642 | 1,22753 |
| 435 | A0A6N0AW60 | Inosine-5'-monophosphate dehydrogenase                | 0,81791 | 1,11612 |
| 436 | A0A6N0B6D3 | L-aspartate oxidase                                   | 0,08508 | 2,58766 |
| 437 | A0A6N0AQ96 | Ribonuclease E                                        | 0,38562 | 0,51969 |
| 438 | A0A6N0AHQ5 | Quorum-sensing regulator protein G                    | 0,00014 | 3,21575 |
| 439 | A0A6N0BCX3 | DNA-binding protein HU-beta                           | 0,00000 | 0,25156 |
| 440 | A0A6N0B438 | Uncharacterized protein                               | 0,00035 | 0,11505 |
| 441 | A0A6N0BG84 | Monooxygenase YcnE                                    | 0,00088 | 1,75465 |
| 442 | A0A6N0ADH1 | Hydroperoxy fatty acid reductase gpx1                 | 0,00444 | 2,06854 |
| 443 | A0A6N0A8L6 | Protein GrpE                                          | 0,00002 | 1,78255 |
| 444 | A0A6N0BHP5 | Outer membrane lipoprotein SlyB                       | 0,00029 | 1,42034 |
| 445 | A0A6N0AHQ6 | Vibriobactin utilization protein ViuB                 | 0,00729 | 0,38270 |
| 446 | A0A6N0BJ75 | 50S ribosomal protein L14                             | 0,03135 | 1,25313 |
| 447 | A0A6N0ARB5 | Phosphoribosylglycinamide formyltransferase 2         | 0,00010 | 3,48609 |
| 448 | A0A6N0ACI7 | Translation initiation factor IF-3                    | 0,00015 | 3,78036 |
| 449 | A0A6N0AII9 | Thiamine-binding periplasmic protein                  | 0,11160 | 1,60107 |
| 450 | A0A6N0AFY6 | Uncharacterized protein                               | 0,13680 | 1,22117 |
| 451 | A0A6N0AR82 | GDP-mannose pyrophosphatase NudK                      | 0,00000 | 4,81772 |
| 452 | A0A6N0BF10 | Quinone oxidoreductase 2                              | 0,22364 | 1,15368 |
| 453 | A0A6N0AWZ6 | Uncharacterized protein                               | 0,00282 | 0,58491 |

|     |            |                                                  |         |         |
|-----|------------|--------------------------------------------------|---------|---------|
| 454 | A0A6N0BJQ5 | Spermidine synthase                              | 0,33829 | 1,14891 |
| 455 | A0A6N0BAN9 | 30S ribosomal protein S12                        | 0,44111 | 0,51722 |
| 456 | A0A6N0B916 | Bacterioferritin                                 | 0,00351 | 1,22251 |
| 457 | A0A6N0AFG9 | 30S ribosomal protein S18                        | 0,00073 | 1,63537 |
| 458 | A0A6N0BCL0 | Uncharacterized protein                          | 0,01495 | 2,55171 |
| 459 | A0A6N0AL50 | 6,7-dimethyl-8-ribityllumazine synthase          | 0,44676 | 1,09247 |
| 460 | A0A6N0AF66 | Phenylalanine--tRNA ligase alpha subunit         | 0,11553 | 1,72334 |
| 461 | A0A6N0ANT6 | Uncharacterized protein                          | 0,59520 | 0,75807 |
| 462 | A0A6N0BDC0 | 50S ribosomal protein L25                        | 0,12630 | 0,77624 |
| 463 | A0A6N0BGU2 | Protease PrtS                                    | 0,01138 | 0,27953 |
| 464 | A0A6N0A6N3 | Protein-export protein SecB                      | 0,03960 | 0,65486 |
| 465 | A0A6N0ASG4 | Acetate kinase                                   | 0,01474 | 1,70223 |
| 466 | A0A6N0AEN3 | Lactoylglutathione lyase                         | 0,10508 | 2,60070 |
| 467 | A0A6N0B5X8 | 26 kDa periplasmic immunogenic protein           | 0,00005 | 2,23064 |
| 468 | A0A6N0AVB8 | Elongation factor P                              | 0,45862 | 0,92847 |
| 469 | A0A6N0AFQ9 | Major outer membrane lipoprotein Lpp             | 0,24878 | 1,11283 |
| 470 | A0A6N0B3P2 | Ureidoglycolate lyase                            | 0,00177 | 2,67918 |
| 471 | A0A6N0ACB8 | Uncharacterized protein                          | 0,00003 | 0,12345 |
| 472 | A0A6N0BKZ5 | Uncharacterized protein                          | 0,65151 | 0,83307 |
| 473 | A0A6N0AZ21 | Transcription elongation factor GreA             | 0,02975 | 1,99623 |
| 474 | A0A6N0AMQ7 | DNA-binding protein H-NS                         | 0,02451 | 1,42436 |
| 475 | A0A6N0AFU0 | 2-dehydro-3-deoxyphosphooctonate aldolase        | 0,65805 | 0,76295 |
| 476 | A0A6N0AVX4 | Dihydroxy-acid dehydratase OS=Dickeya solani     | 0,08981 | 0,26090 |
| 477 | A0A6N0ANV9 | Putative acyl-CoA thioester hydrolase            | 0,02796 | 3,56192 |
| 478 | A0A6N0A729 | Lipopolysaccharide export system protein LptA    | 0,19256 | 1,23000 |
| 479 | A0A6N0A900 | ADP-L-glycero-D-manno-heptose-6-epimerase        | 0,95236 | 1,00919 |
| 480 | A0A6N0AWC1 | Autonomous glycyl radical cofactor               | 0,27686 | 0,23583 |
| 481 | A0A6N0B7S0 | Ferredoxin--NADP reductase                       | 0,30308 | 1,32502 |
| 482 | A0A6N0AZE7 | Protein translocase subunit SecD                 | 0,00712 | 0,33367 |
| 483 | A0A6N0BLV3 | Uncharacterized protein                          | 0,00011 | 0,80705 |
| 484 | A0A6N0ABR0 | Uncharacterized protein                          | 0,00008 | 5,82192 |
| 485 | A0A6N0ATR4 | RNA polymerase-binding transcription factor DksA | 0,00675 | 2,49667 |
| 486 | A0A6N0B7C5 | Carnitine operon protein CaiE                    | 0,08813 | 1,76780 |
| 487 | A0A6N0AHB1 | Uncharacterized protein                          | 0,23091 | 1,12132 |
| 488 | A0A6N0AQ18 | Molybdenum cofactor biosynthesis protein B       | 0,00033 | 2,12509 |
| 489 | A0A6N0BLT4 | Multiple stress resistance protein BhsA          | 0,00160 | 2,86440 |
| 490 | A0A6N0AN68 | NADPH-dependent 7-cyano-7-deazaguanine reductase | 0,34992 | 1,59106 |
| 491 | A0A6N0ASP1 | Cysteine--tRNA ligase                            | 0,35827 | 1,16102 |
| 492 | A0A6N0AHE2 | Quinone oxidoreductase I                         | 0,93388 | 1,04710 |
| 493 | A0A6N0BAW1 | Disulfide-bond oxidoreductase YghU               | 0,00007 | 4,34219 |
| 494 | A0A6N0BHZ8 | Uncharacterized protein                          | 0,03704 | 1,58117 |
| 495 | A0A2K8W3A7 | Uncharacterized protein                          | 0,00003 | 0,06389 |
| 496 | A0A6N0AIT6 | Thioredoxin-1                                    | 0,42059 | 1,12774 |
| 497 | A0A6N0AG39 | 3-oxoacyl-[acyl-carrier-protein] synthase 3      | 0,00144 | 3,22220 |
| 498 | A0A6N0ACT8 | Extracellular phospholipase C                    | 0,00005 | 0,08742 |
| 499 | A0A6N0BGH3 | Methyl-accepting chemotaxis protein I            | 0,75529 | 1,24544 |
| 500 | A0A6N0B689 | 30S ribosomal protein S16                        | 0,00010 | 0,56012 |

|     |            |                                                         |         |         |
|-----|------------|---------------------------------------------------------|---------|---------|
| 501 | A0A6N0ADS2 | Basal-body rod modification protein FlgD                | 0,00105 | 0,14239 |
| 502 | A0A6N0AZ75 | 3-hydroxyacyl-[acyl-carrier-protein] dehydratase FabZ   | 0,98182 | 1,01670 |
| 503 | A0A6N0AYU5 | Regulator of ribonuclease activity A                    | 0,17264 | 1,06285 |
| 504 | A0A2K8VYS8 | 50S ribosomal protein L18                               | 0,00916 | 3,14989 |
| 505 | A0A2K8W5P0 | Lipoprotein, putative                                   | 0,01443 | 1,67623 |
| 506 | A0A6N0BI00 | Transcriptional regulatory protein YycF                 | 0,09709 | 1,29444 |
| 507 | A0A6N0AQ75 | Penicillin-binding protein activator LpoB               | 0,16405 | 0,86397 |
| 508 | A0A6N0B2N5 | Copper-exporting P-type ATPase A                        | 0,79912 | 1,11945 |
| 509 | A0A6N0BG21 | Septum site-determining protein MinD                    | 0,05576 | 3,32676 |
| 510 | A0A6N0B0H6 | Putative phosphatase YcdX                               | 0,00002 | 3,17872 |
| 511 | A0A6N0AWQ4 | Cell division protein ZapB                              | 0,02089 | 0,64664 |
| 512 | A0A6N0BJP3 | Aspartate 1-decarboxylase                               | 0,07920 | 1,12601 |
| 513 | A0A6N0BIP4 | 30S ribosomal protein S20                               | 0,00226 | 2,13921 |
| 514 | A0A6N0BIF9 | 30S ribosomal protein S19                               | 0,01024 | 1,73163 |
| 515 | A0A6N0AVD9 | 50S ribosomal protein L23                               | 0,00950 | 1,68357 |
| 516 | A0A6N0AMJ6 | Arsenate reductase                                      | 0,00798 | 3,47615 |
| 517 | A0A6N0BEW5 | Cysteine desulfurase                                    | 0,66112 | 1,23324 |
| 518 | A0A6N0BEQ1 | Uncharacterized protein                                 | 0,63729 | 1,02055 |
| 519 | A0A6N0B2C2 | Uncharacterized protein                                 | 0,00000 | 0,02201 |
| 520 | A0A6N0B0E4 | Uncharacterized protein                                 | 0,57690 | 1,16908 |
| 521 | A0A6N0AZN9 | Murein DD-endopeptidase MepS/Murein LD-carboxypeptidase | 0,00018 | 6,37213 |
| 522 | A0A6N0AXE4 | Regulator of nucleoside diphosphate kinase              | 0,00843 | 2,06528 |
| 523 | A0A6N0BDL9 | Exodeoxyribonuclease III                                | 0,00056 | 6,34737 |
| 524 | A0A6N0AVZ4 | N5-carboxyaminoimidazole ribonucleotide mutase          | 0,22359 | 1,11255 |
| 525 | A0A6N0AGY4 | Xanthine phosphoribosyltransferase                      | 0,90132 | 0,97358 |
| 526 | A0A6N0AJY7 | 50S ribosomal protein L27                               | 0,00600 | 0,29101 |
| 527 | A0A6N0BBK3 | Phosphocarrier protein HPr                              | 0,25191 | 0,87589 |
| 528 | A0A6N0BHM3 | Exoribonuclease 2                                       | 0,05291 | 2,01878 |
| 529 | A0A6N0BAZ3 | Glycerol-3-phosphate transporter                        | 0,44903 | 0,61204 |
| 530 | A0A6N0B685 | Glutathione S-transferase GstB                          | 0,45289 | 0,78433 |
| 531 | A0A6N0AGM0 | Organic hydroperoxide resistance protein OhrB           | 0,03196 | 1,62597 |
| 532 | A0A6N0BE36 | Elongation factor P-like protein                        | 0,00352 | 2,48128 |
| 533 | A0A6N0BAH4 | Peptide deformylase                                     | 0,00887 | 1,23498 |
| 534 | A0A6N0BHM5 | Ribosome-associated inhibitor A                         | 0,01153 | 0,33316 |
| 535 | A0A6N0ANJ7 | 3-phosphoshikimate 1-carboxyvinyltransferase            | 0,36378 | 1,57108 |
| 536 | A0A6N0A9T3 | Glyoxylate/hydroxypyruvate reductase B                  | 0,00042 | 3,56936 |
| 537 | A0A6N0ALR6 | UTP--glucose-1-phosphate uridylyltransferase            | 0,30089 | 0,14543 |
| 538 | A0A6N0AZ35 | Thymidylate synthase                                    | 0,01187 | 4,46157 |
| 539 | A0A6N0B906 | 50S ribosomal protein L29                               | 0,92923 | 1,07191 |
| 540 | A0A6N0B8Z5 | 50S ribosomal protein L30                               | 0,20877 | 0,79562 |
| 541 | A0A6N0B3Z1 | Galactose-6-phosphate isomerase subunit LacB            | 0,00168 | 1,43518 |
| 542 | A0A6N0BHV4 | CTP synthase OS=Dickeya solani                          | 0,05479 | 6,79570 |
| 543 | A0A6N0BDR4 | Integration host factor subunit beta                    | 0,00038 | 0,11765 |
| 544 | A0A6N0AXC0 | Protease 3 OS=Dickeya solani                            | 0,80467 | 1,13753 |
| 545 | A0A6N0B929 | 5-keto-4-deoxy-D-glucarate aldolase                     | 0,36903 | 0,76178 |
| 546 | A0A6N0B520 | Uncharacterized protein                                 | 0,00031 | 0,21246 |

|     |            |                                                                   |         |          |
|-----|------------|-------------------------------------------------------------------|---------|----------|
| 547 | A0A6N0AGU6 | ABC transporter periplasmic-binding protein YtfQ                  | 0,83241 | 1,05241  |
| 548 | A0A6N0AGL3 | Sugar phosphatase YfbT OS=Dickeya solani                          | 0,11766 | 1,19936  |
| 549 | A0A6N0BFL7 | Tautomerase PptA                                                  | 0,74154 | 0,85944  |
| 550 | A0A6N0B972 | ATP-dependent protease subunit HslV                               | 0,00000 | 2,38437  |
| 551 | A0A6N0B1X7 | Ribosomal protein S12 methylthiotransferase accessory factor YcaO | 0,00013 | 5,88344  |
| 552 | A0A6N0AT22 | Molecular chaperone Hsp31 and glyoxalase 3                        | 0,15870 | 2,58930  |
| 553 | A0A6N0AN16 | DNA protection during starvation protein                          | 0,00036 | 2,92396  |
| 554 | A0A6N0AGW8 | 30S ribosomal protein S17                                         | 0,00002 | 0,29969  |
| 555 | A0A6N0BKV8 | Iron-sulfur cluster insertion protein ErpA                        | 0,00508 | 1,59480  |
| 556 | A0A6N0BH92 | Thioredoxin reductase                                             | 0,00004 | 1,95124  |
| 557 | A0A6N0B8Y3 | Putative amino-acid import ATP-binding protein YxeO               | 0,99204 | 1,00295  |
| 558 | A0A6N0AKA3 | Uncharacterized protein                                           | 0,00739 | 1,56577  |
| 559 | A0A6N0AC34 | Hydroxylamine reductase                                           | 0,00313 | 5,84100  |
| 560 | A0A2K8VWB4 | Bifunctional protein FolD                                         | 0,00011 | 1,65128  |
| 561 | A0A6N0AN39 | Putative lipoprotein YgdR                                         | 0,00011 | 4,94368  |
| 562 | A0A6N0AF74 | Chemotaxis protein CheY                                           | 0,00118 | 0,06831  |
| 563 | A0A6N0ACV6 | Putative methyltransferase YcgJ                                   | 0,49883 | 1,99146  |
| 564 | A0A6N0ABD4 | Multiphosphoryl transfer protein                                  | 0,93187 | 0,95534  |
| 565 | A0A6N0BJ39 | D-lactate dehydrogenase                                           | 0,34003 | 1,36839  |
| 566 | A0A6N0AYR8 | Alkyl hydroperoxide reductase subunit F                           | 0,00095 | 4,48836  |
| 567 | A0A6N0AQ45 | Copper resistance protein C                                       | 0,01450 | 1,39445  |
| 568 | A0A6N0AGK2 | NADH-quinone oxidoreductase subunit G                             | 0,81886 | 1,11079  |
| 569 | A0A6N0AVL3 | Der GTPase-activating protein YihI                                | 0,25195 | 1,07733  |
| 570 | A0A6N0AV94 | Enhancing lycopene biosynthesis protein 2                         | 0,33925 | 0,11434  |
| 571 | A0A6N0B5W5 | Cyclodextrin-binding protein                                      | 0,01395 | 2,80562  |
| 572 | A0A6N0B0C8 | Uncharacterized protein                                           | 0,00021 | 2,48930  |
| 573 | A0A6N0B3D2 | Uncharacterized protein                                           | 0,00016 | 10,77175 |
