# Supplementary material for: The Periplasmic Oxidoreductase DsbA Is Required for Virulence of the Phytopathogen Dickeya solani
Source: MDPI journal article supplement (doi:10.3390/ijms23020697), 2022-01-09
Supplement: s1 [file s1]

**Table S1.** Proteomic comparison of the *D. solani* *dsbA* and the parental *D. solani* IPO2222 grown under non-stressful or oxidative stress conditions. Green areas: p-value  $x < 0.05$ ; red areas: fold change  $2.0 < y < 0.5$ . For the analysis, the *Dickeya solani* D s0432-1 database from Uniprot.org on the 19th of October 2020 was used.

**Table S2.** List of all proteins quantified in the *Dickeya solani* IPO2222 secretomes. Protein ratios of *dsbA* mutant to the wt strain are presented (fold change). Green areas: p-value  $x < 0.05$ ; red areas: fold change  $2.0 < y < 0$ . For the analysis, the *Dickeya solani* D s0432-1 database from Uniprot.org on the 19th of October 2020 was used.
