# Supplementary material for: The Periplasmic Oxidoreductase DsbA Is Required for Virulence of the Phytopathogen Dickeya solani
Source: MDPI journal article supplement (doi:10.3390/ijms23020697), 2022-01-09
Supplement: s1 [file s1]

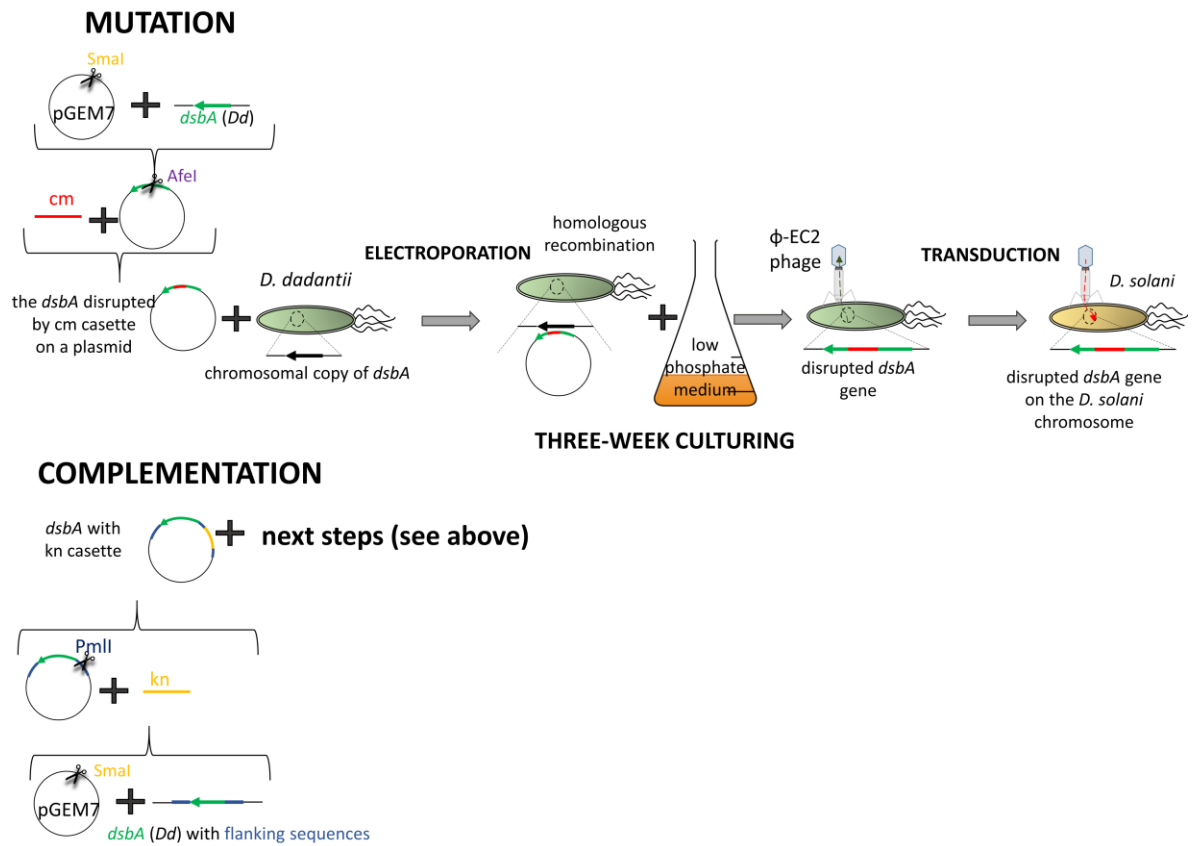

**Figure S1.** Scheme of the construction of the *D. solani* IPO222 *dsbA* mutant and complemented strains.

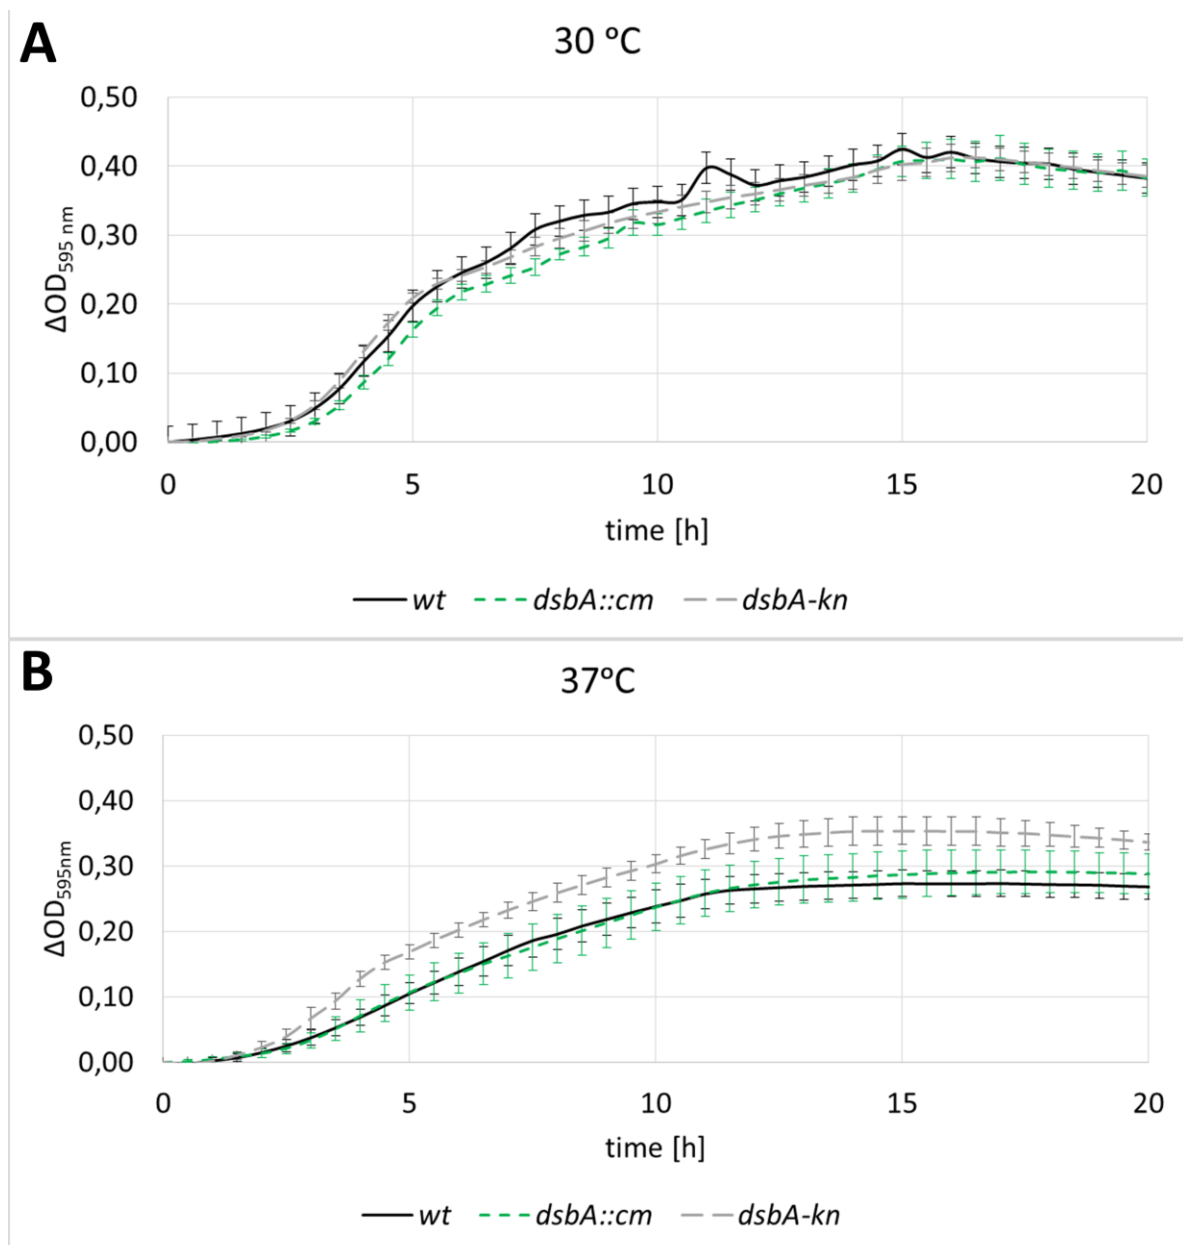

**Figure S2.** Growth curves of the *D. solani* IPO2222 strains and its derivatives. Growth curves were determined with the use of the EnSpire plate reader (PerkinElmer, Waltham, MA, USA) in a 24-well nontreated plate (#702011 Wuxi NEST Biotechnology Co., Ltd., Wuxi, China). The overnight cultures of the wild type (wt), *dsbA* mutant TP02, (*dsbA*) and complemented TP03 (comp) strains were diluted 1:50 with LB medium to a final volume of 1 ml and incubated at 30 °C (A) or 37 °C (B), with orbital shaking (120 rpm). The optical density was measured for 20 h and averaged for five biological replicates. The  $\Delta OD_{595\text{ nm}}$  values were obtained by subtraction of the OD values at time “0” from the values at the subsequent time points. The final values were averaged for five independent biological replicates.

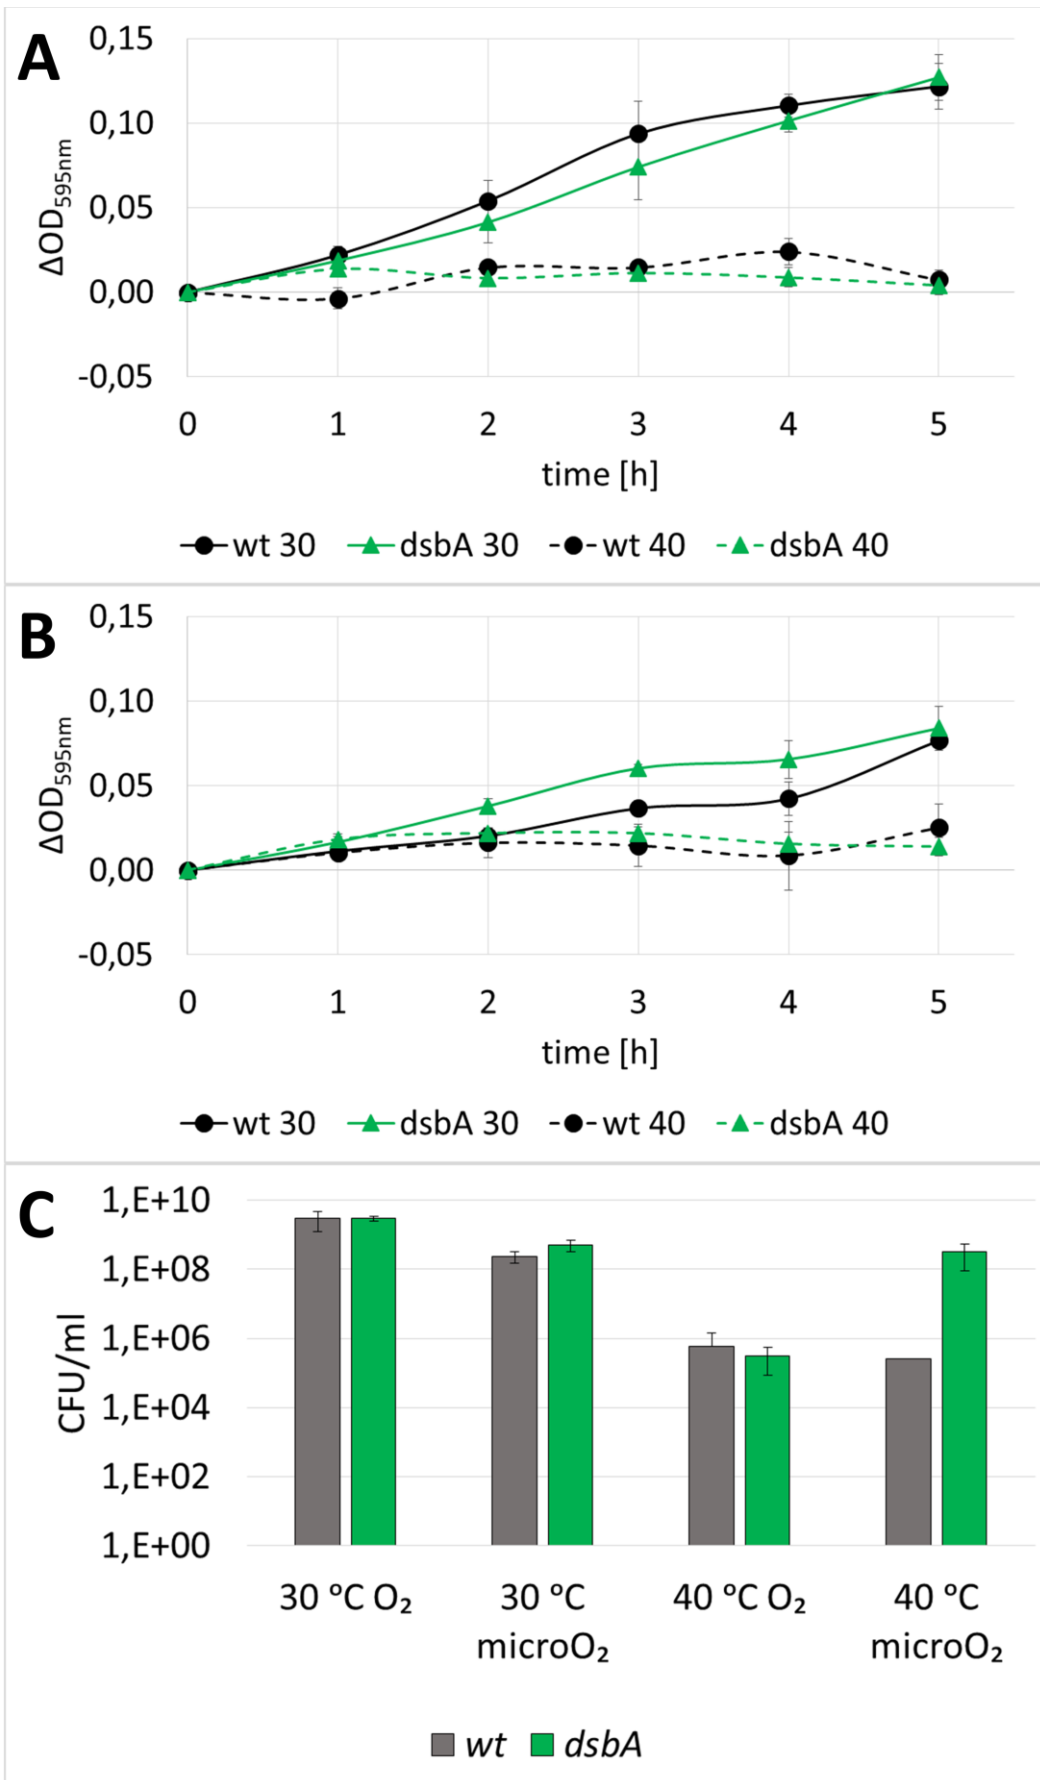

**Figure S3.** *D. solani* IPO2222 wild type and *dsbA* mutant (TP02) growth and viability at elevated temperature (40 °C). Growth curves of the exponential (A) and stationary (B) phase cultures at 30 °C (control) or 40 °C. Viability was evaluated by measurement of CFU of bacteria growth on M63Y plates at 40 °C under aerobic or microaerobic conditions (C). Error bars represent SD from three independent experimental repetitions.

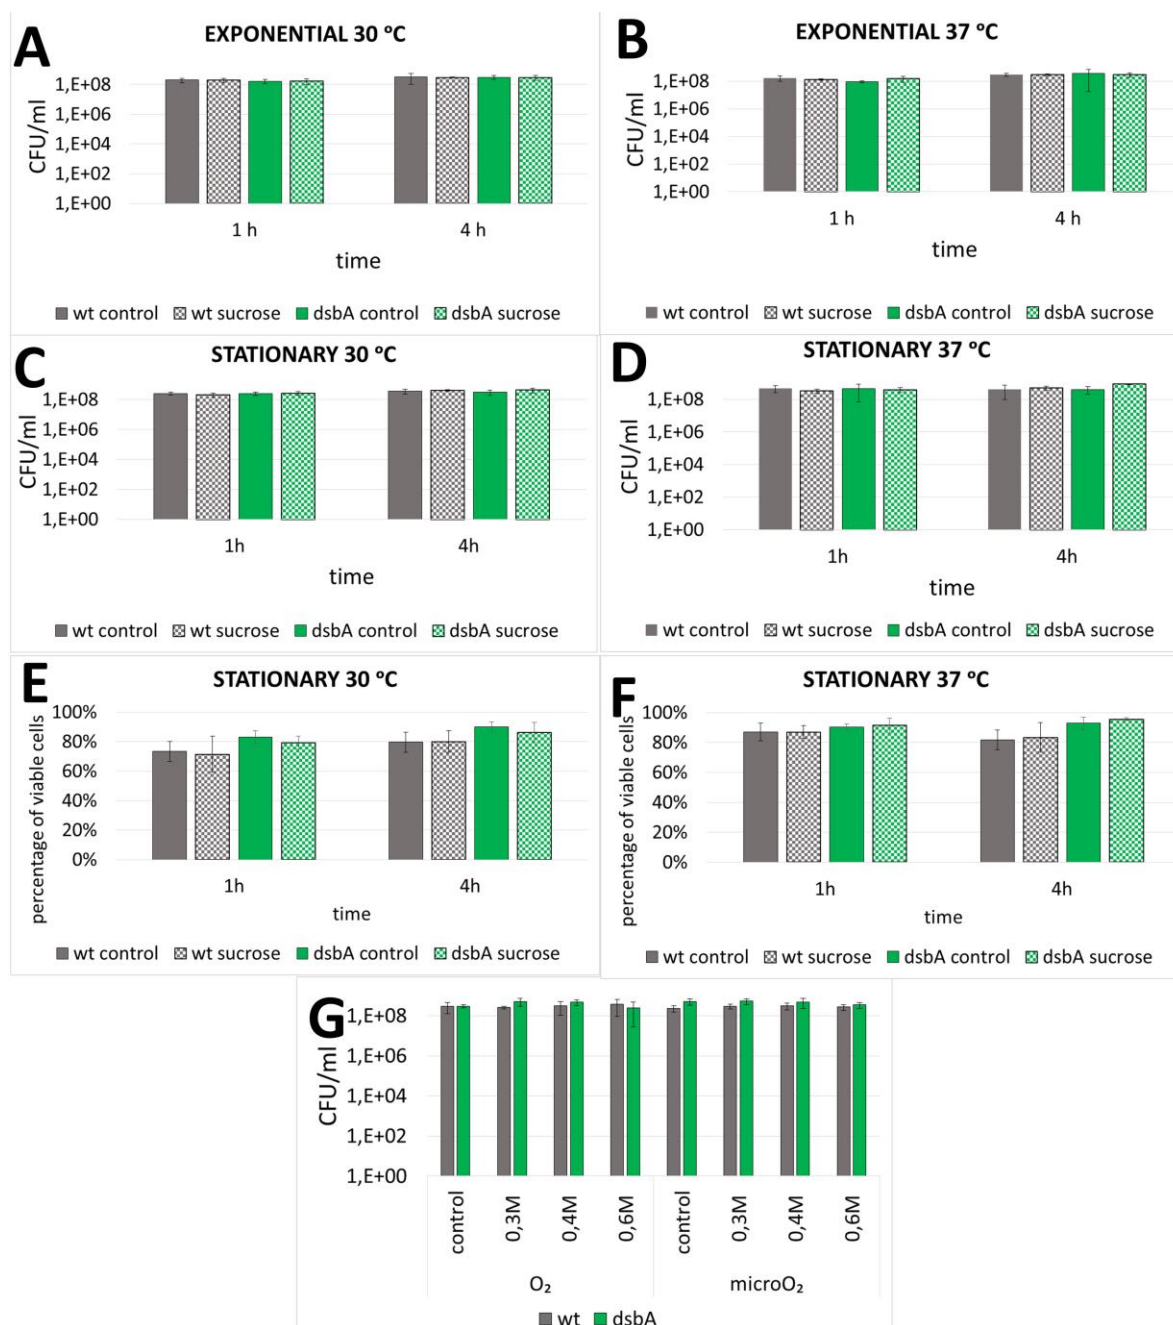

**Figure S4.** Resistance of *D. solani* IPO2222 wild type and *dsbA* mutant (TP02) to osmotic non-ionic stress in the exponential (A and B), stationary (C-F) growth phase. Viability was measured as a CFU ml<sup>-1</sup> (A-D) or percentage of viable cells in live/dead microscopic test (E and F). Panel G shows CFU enumeration of bacteria exposed to different concentrations of sucrose in solid medium. In the CFU tests, error bars represent SD from three independent experimental repetitions; in the live-dead assay,

data obtained from three independent biological replicates with at least three technical replicates per sample were analyzed.

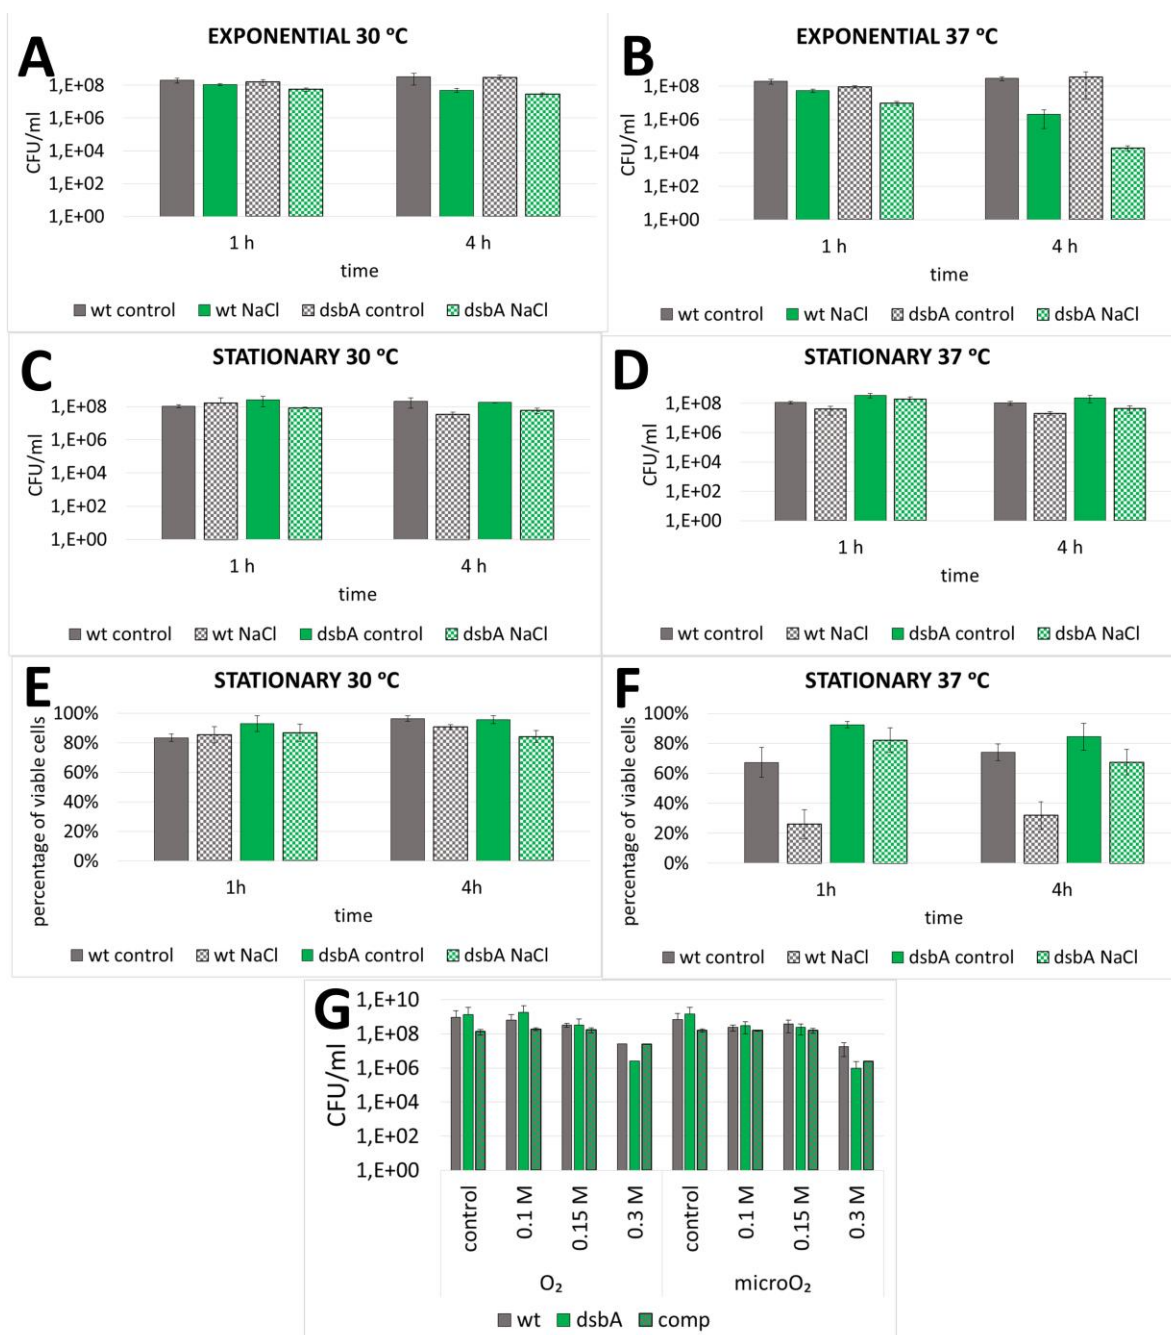

**Figure S5.** Resistance of *D. solani* IPO2222 wild type and *dsbA* mutant (TP02) to salt stress in the exponential (A and B), stationary (C-F) growth phase. Viability was measured as a CFU ml<sup>-1</sup> (A-D) or percentage of viable cells in live/dead microscopic test (E and F). Panel G shows growth of bacteria exposed to different concentration of NaCl in solid medium (comp – complemented strain, TP03). In the CFU tests, error bars represent SD from three independent experimental repetitions; in the live-dead assay, data obtained from three independent biological replicates with at least three technical replicates per sample were analyzed.

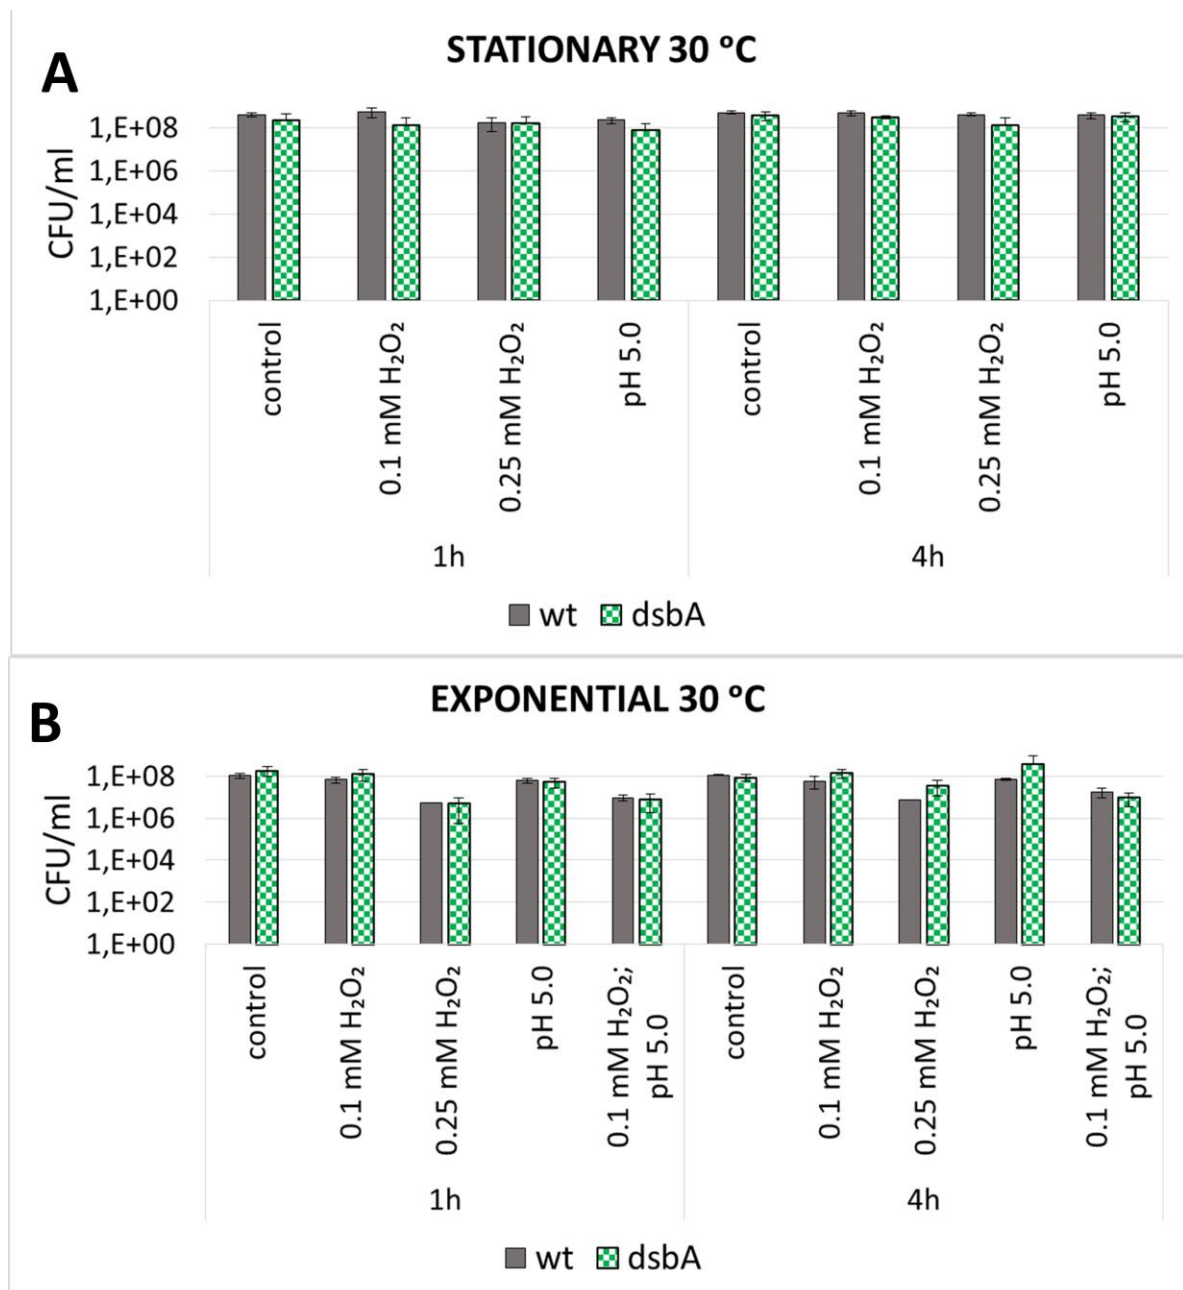

**Figure S6.** Resistance of *D. solani* IPO2222 wild type and *dsbA* mutant to oxidative or acidic stress in the exponential (A) or stationary growth phase (B) at optimal temperature. The error bars represent SD from three experimental repetitions.

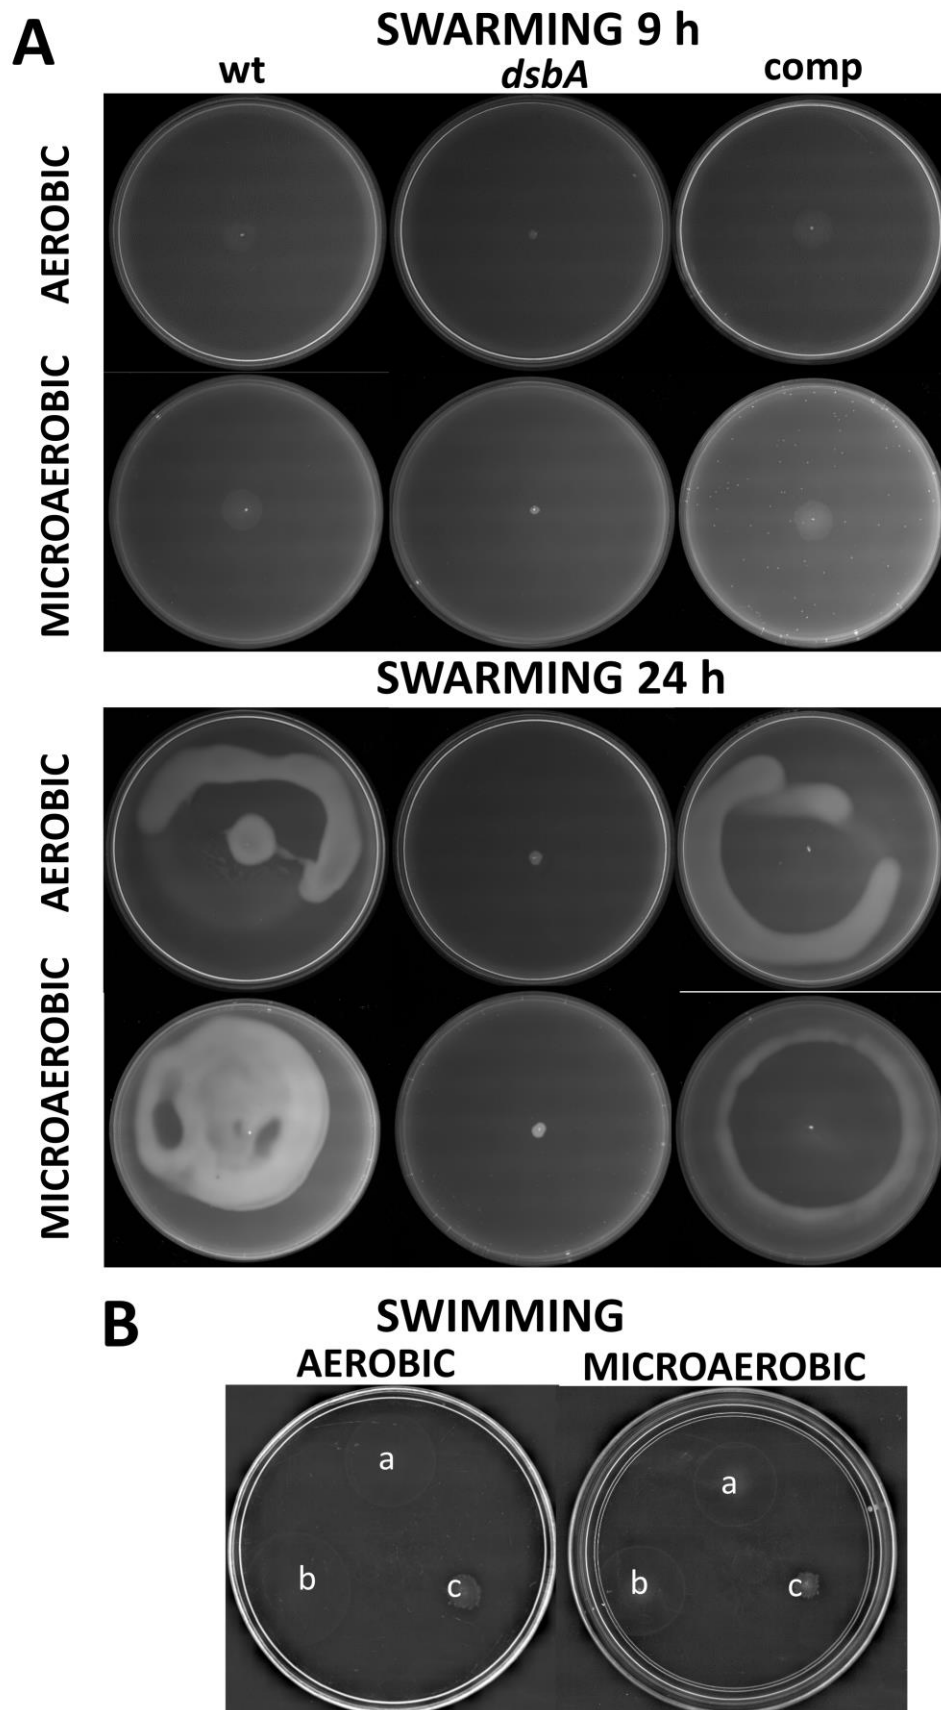

**Figure S7.** Effect of the *dsbA* knockout on the motility of *D. solani*. Representative examples of swarming (A) and swimming (B) plates; wt – wild type strain; *dsbA* – mutant strain TP02; comp –



complemented strain TP03; (a - *D. solani* wild type strain; b – complemented strain TP03; c – *dsbA* mutant TP02); wt – wild type strain; *dsbA* – mutant strain TP02; comp – complemented strain TP03.

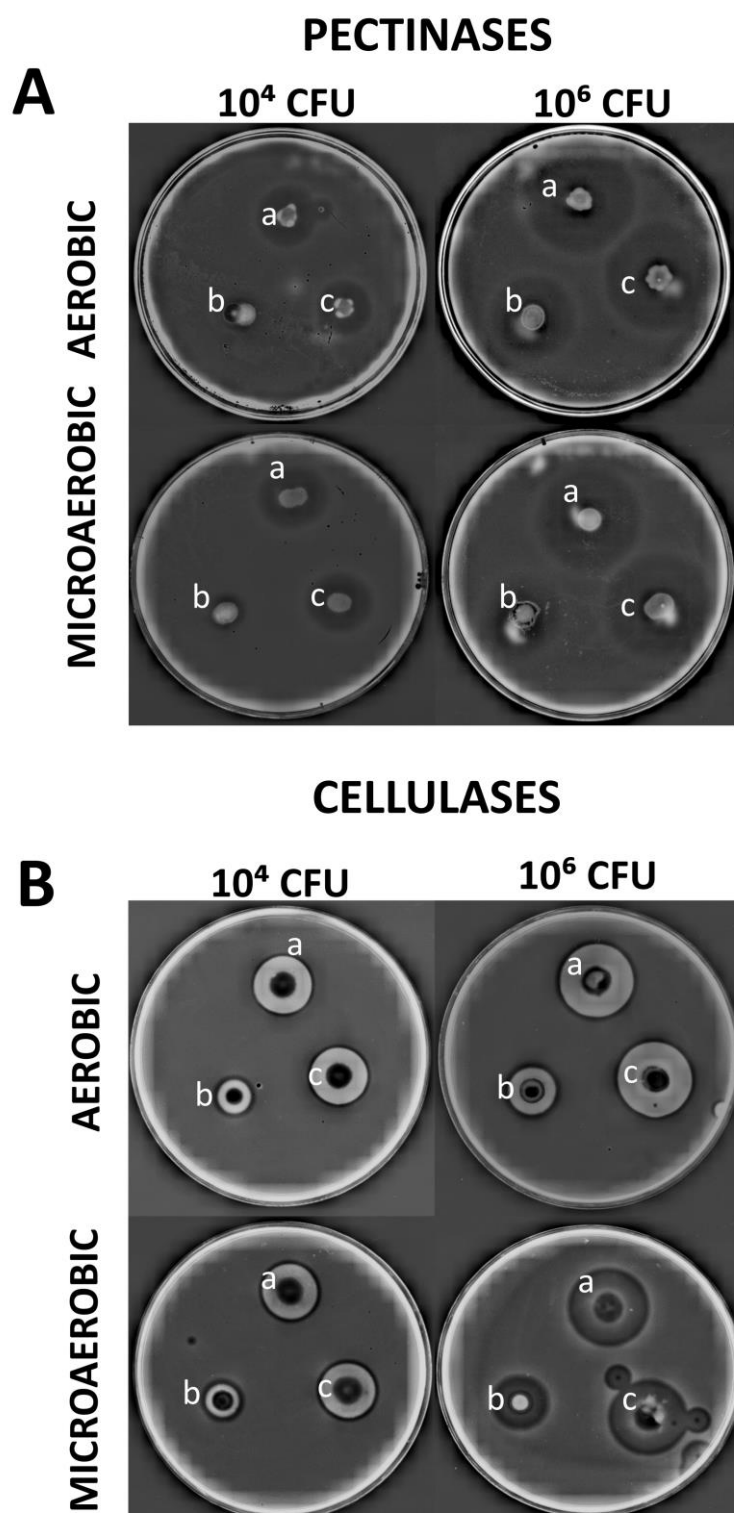

**Figure S8.** Impact of the *dsbA* knockout on the virulence factors of the *D. solani* secretome: (A) (B) Representative examples of the pectinase (A) and cellulase (B) plate assay (a - *D. solani* wild type strain; b - *dsbA* mutant TP02; c - complemented strain TP03); wt – wild type strain; *dsbA* – mutant strain TP02; comp – complemented strain TP03.



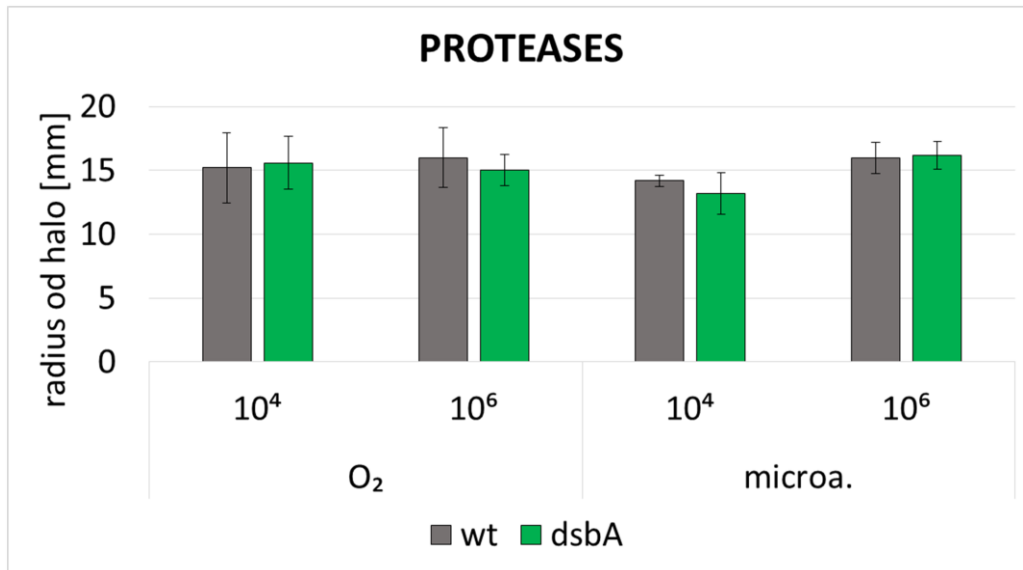

Figure S9. Secreted proteolytic activity of the *dsbA* mutant and wt *Dickeya solani* IPO2222. The error bars represent SD from five independent experimental repetitions.

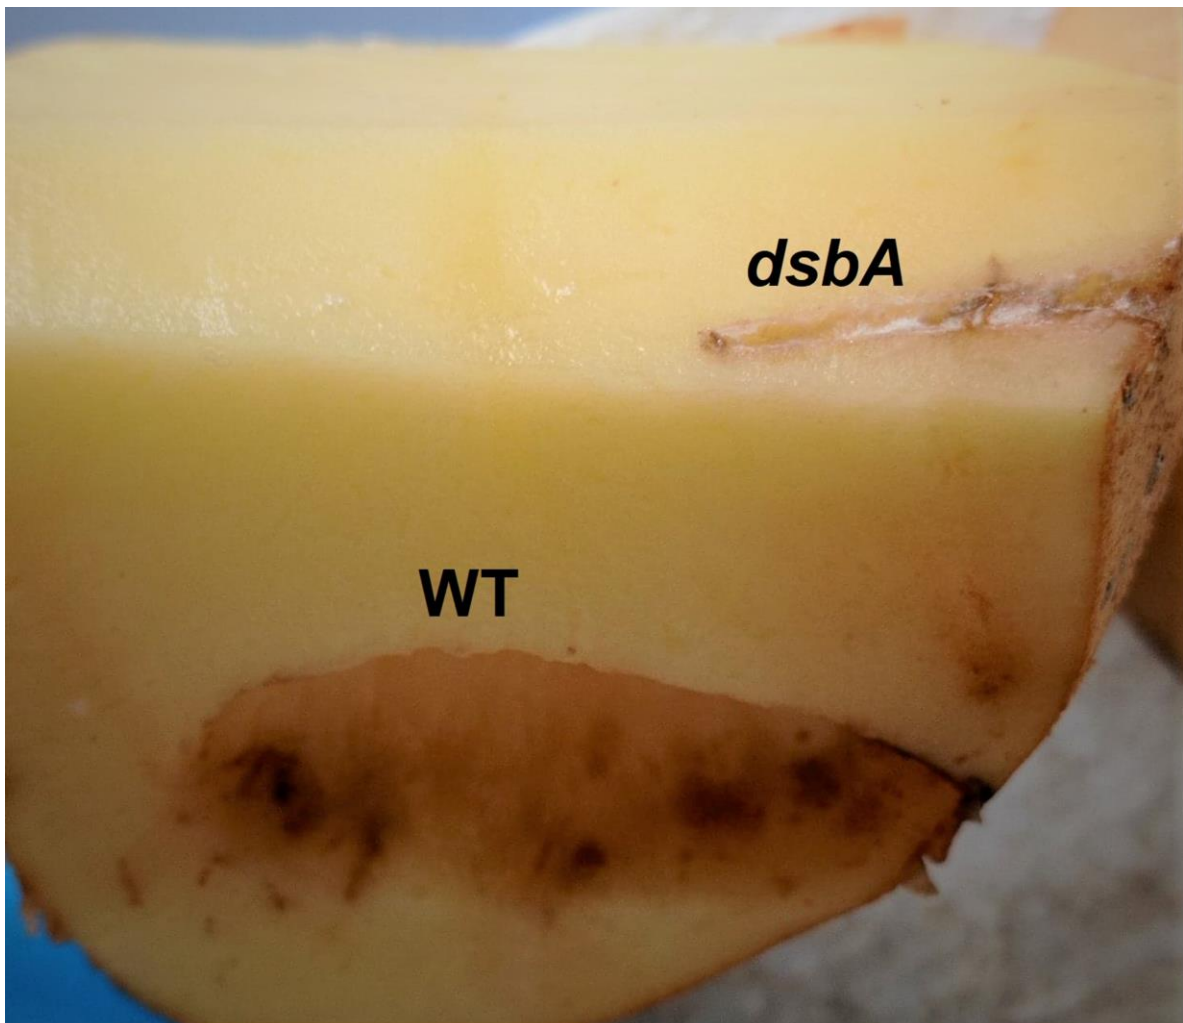

**Figure S10.** Potato tuber maceration caused by the *D. solani* IPO2222 strains (holes after removal of the macerated tissue).

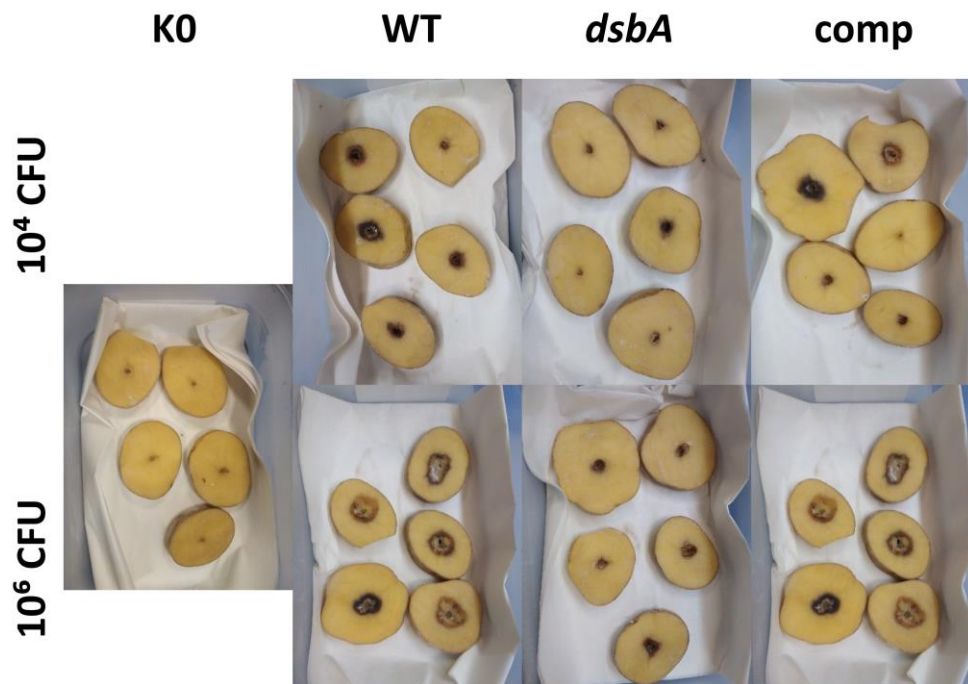

**Figure S11.** Potato tuber slices maceration by the *D. solani* IPO2222 strains (wt – wild type strain, *dsbA* – mutant strain, TP02; comp – complemented strain, TP03).

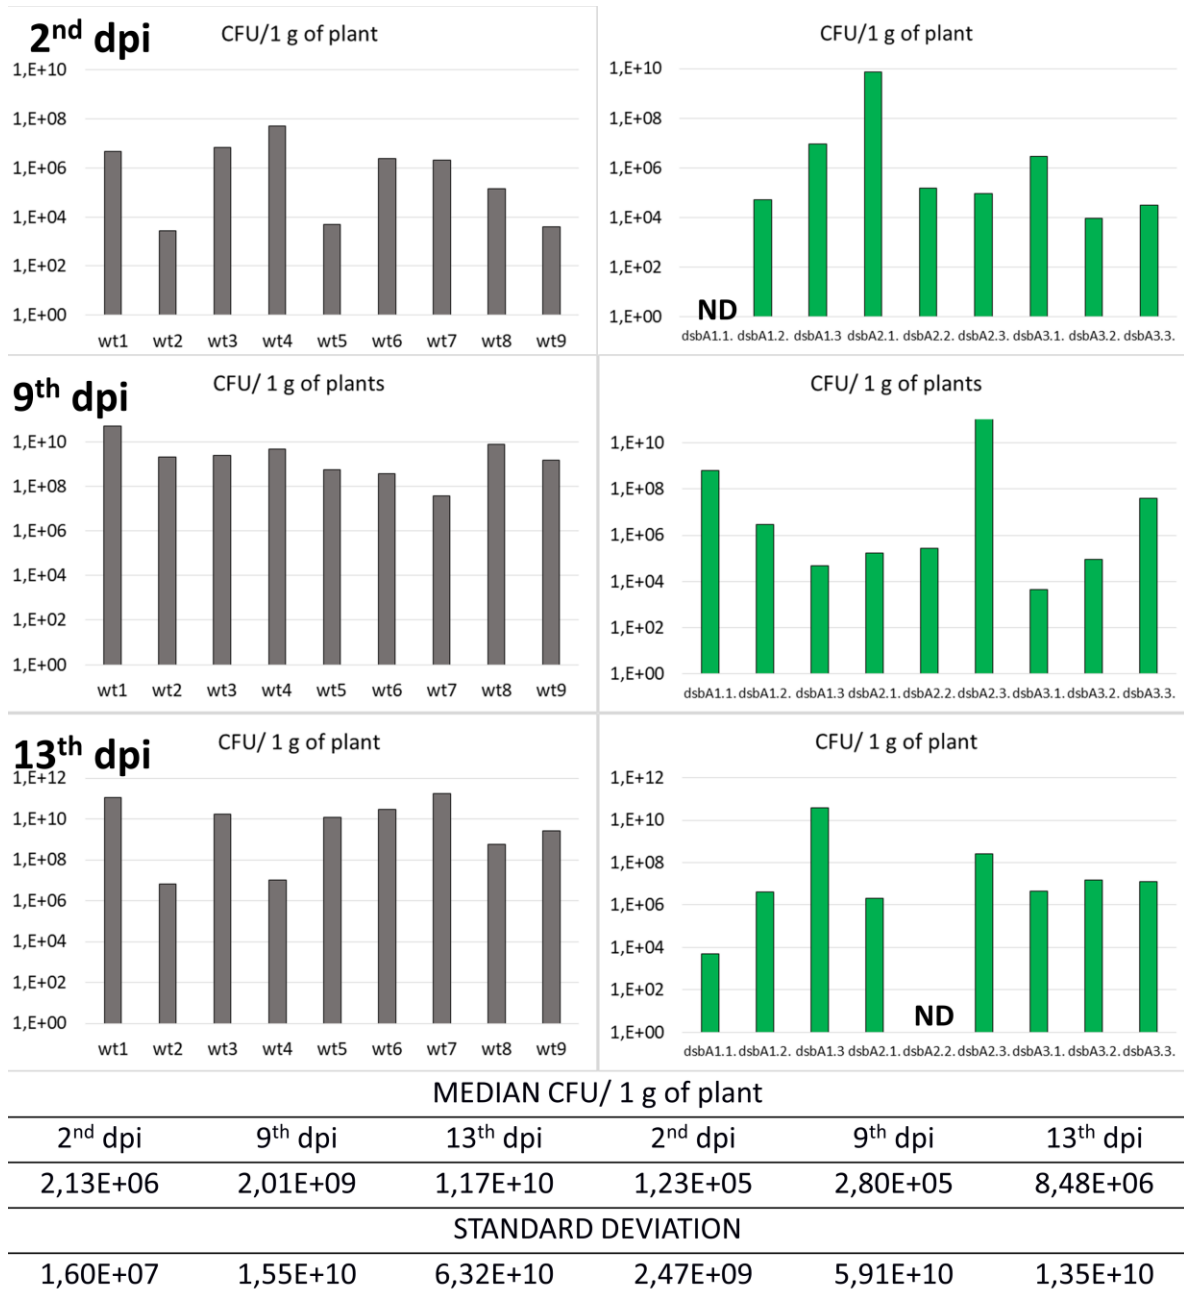

**Figure S12.** *In vitro* infection assay. CFU counts in plantlets' tissues 2, 9 or 13 days post-infection (dpi). The Dunnett test performed on the median CFU/1g values of wild type and *dsbA* mutant (TP02) after discarding the ND values did not show significant differences (2 dpi: 0.306685; 9th dpi: 0.553635; 13th dpi: 0.157768). ND, notdetected; *dsbA*1, *dsbA*2, *dsbA*3 stand for the three independently obtained *dsbA* knockout strains.
