# Supplementary material for: The Periplasmic Oxidoreductase DsbA Is Required for Virulence of the Phytopathogen Dickeya solani
Source: MDPI journal article supplement (doi:10.3390/ijms23020697), 2022-01-09
Supplement: s1 [file s1]

| Index | UniProt ID | Name/Description                                                      | NON-STRESSFUL<br>CONDITIONS:<br>dsbA/wt |             | wt strain: OXIDATIVE<br>STRESS/NON-S.<br>CONDITIONS |             | dsbA strain:<br>OXIDATIVE<br>STRESS/NON-S.<br>CONDITIONS |             |
|-------|------------|-----------------------------------------------------------------------|-----------------------------------------|-------------|-----------------------------------------------------|-------------|----------------------------------------------------------|-------------|
|       |            |                                                                       | p-value                                 | Fold Change | p-value                                             | Fold Change | p-value                                                  | Fold Change |
| 1     | A0A6N0AV44 | DNA-directed RNA polymerase subunit beta                              | 0,97540                                 | 1,00288     | 0,04044                                             | 1,16126     | 0,09010                                                  | 1,18265     |
| 2     | A0A6N0A6S9 | DNA-directed RNA polymerase subunit beta                              | 0,00540                                 | 1,22724     | 0,16907                                             | 0,95291     | 0,05006                                                  | 0,86422     |
| 3     | A0A6N0ANI6 | 60 kDa chaperonin                                                     | 0,02668                                 | 0,94556     | 0,00168                                             | 0,85170     | 0,19121                                                  | 0,93837     |
| 4     | A0A6N0ABM2 | 30S ribosomal protein S1                                              | 0,21829                                 | 0,85591     | 0,01967                                             | 0,79017     | 0,76208                                                  | 0,96468     |
| 5     | A0A6N0AVZ8 | Glycerol kinase                                                       | 0,00678                                 | 0,82840     | 0,75861                                             | 0,97472     | 0,59990                                                  | 0,96380     |
| 6     | A0A6N0ARG9 | Outer membrane protein F                                              | 0,34767                                 | 1,04808     | 0,17244                                             | 1,06588     | 0,83256                                                  | 1,01147     |
| 7     | A0A6N0BHM0 | Aerobic glycerol-3-phosphate dehydrogenase                            | 0,13188                                 | 1,04578     | 0,00286                                             | 0,87503     | 0,07641                                                  | 0,92173     |
| 8     | A0A6N0ALD5 | Glutamate synthase [NADPH] large chain                                | 0,95753                                 | 0,99126     | 0,00613                                             | 0,84043     | 0,61829                                                  | 0,89796     |
| 9     | A0A6N0ABI9 | Formate acetyltransferase 1                                           | 0,01436                                 | 0,81264     | 0,01965                                             | 0,86248     | 0,00905                                                  | 0,76363     |
| 10    | A0A6N0AJI3 | Elongation factor G                                                   | 0,01312                                 | 1,09812     | 0,22494                                             | 1,03271     | 0,05482                                                  | 1,04030     |
| 11    | A0A6N0AV51 | 5-methyltetrahydropteroyltriglutamate--homocysteine methyltransferase | 0,18654                                 | 0,86388     | 0,70150                                             | 1,02456     | 0,29024                                                  | 1,10241     |
| 12    | A0A6N0ASH5 | Aconitate hydratase 2                                                 | 0,56540                                 | 0,95404     | 0,08965                                             | 0,92351     | 0,06337                                                  | 0,80340     |
| 13    | A0A6N0B4P0 | Phosphoenolpyruvate synthase                                          | 0,00826                                 | 1,35367     | 0,90814                                             | 0,99183     | 0,97937                                                  | 0,99879     |
| 14    | A0A6N0AJ97 | Elongation factor Tu                                                  | 0,00511                                 | 3,99424     | 0,03074                                             | 2,73112     | 0,11803                                                  | 0,79810     |
| 15    | A0A6N0BKU6 | Chaperone protein DnaK                                                | 0,67410                                 | 1,05016     | 0,44913                                             | 0,96429     | 0,94320                                                  | 0,99246     |
| 16    | A0A6N0AI53 | ATP synthase subunit alpha                                            | 0,54449                                 | 0,92445     | 0,26005                                             | 1,07257     | 0,83296                                                  | 1,03045     |
| 17    | A0A6N0BFA5 | Outer membrane protein A                                              | 0,03895                                 | 1,29758     | 0,00018                                             | 0,78498     | 0,53269                                                  | 0,94113     |
| 18    | A0A6N0BE12 | Glyceraldehyde-3-phosphate dehydrogenase A                            | 0,00036                                 | 1,35572     | 0,00039                                             | 0,86487     | 0,01068                                                  | 0,81880     |
| 19    | A0A6N0AIK9 | Chaperone protein ClpB                                                | 0,67667                                 | 1,04162     | 0,62758                                             | 1,04727     | 0,43166                                                  | 0,97388     |
| 20    | A0A6N0B4R5 | Pyruvate dehydrogenase E1 component                                   | 0,02077                                 | 0,90362     | 0,01724                                             | 1,10571     | 0,12521                                                  | 1,05126     |
| 21    | A0A6N0AIL9 | Carbamoyl-phosphate synthase large chain                              | 0,03371                                 | 0,66265     | 0,31982                                             | 1,11689     | 0,16791                                                  | 1,39752     |
| 22    | A0A6N0ANU7 | Trigger factor                                                        | 0,77830                                 | 0,98702     | 0,01992                                             | 0,84653     | 0,00393                                                  | 0,86485     |
| 23    | A0A6N0AEN7 | Periplasmic oligopeptide-binding protein                              | 0,01942                                 | 0,80756     | 0,06400                                             | 1,11833     | 0,01886                                                  | 1,13637     |
| 24    | A0A6N0B9R8 | ATP synthase subunit beta                                             | 0,62531                                 | 0,96323     | 0,05463                                             | 1,14672     | 0,01692                                                  | 1,20470     |

|    |            |                                                   |         |         |         |         |         |         |
|----|------------|---------------------------------------------------|---------|---------|---------|---------|---------|---------|
| 25 | A0A6N0BI17 | Enolase                                           | 0,05407 | 0,90823 | 0,00130 | 1,14325 | 0,10192 | 1,14314 |
| 26 | A0A6N0AF73 | Isocitrate dehydrogenase [NADP]                   | 0,09894 | 0,87435 | 0,01223 | 0,77865 | 0,14624 | 0,90862 |
| 27 | A0A6N0BJS7 | Ketol-acid reductoisomerase                       | 0,23208 | 0,93701 | 0,12865 | 1,09094 | 0,08624 | 1,07157 |
| 28 | A0A6N0AUU7 | Transketolase 1                                   | 0,04046 | 1,19073 | 0,00105 | 1,27717 | 0,61562 | 1,04443 |
| 29 | A0A6N0BEV9 | Lon protease                                      | 0,00110 | 1,32679 | 0,00042 | 1,36665 | 0,09818 | 1,04195 |
| 30 | A0A6N0AAG6 | 2-oxoglutarate dehydrogenase E1 component         | 0,50479 | 0,96401 | 0,00148 | 0,65557 | 0,00837 | 0,79031 |
| 31 | A0A6N0AIR3 | Phosphoglycerate kinase                           | 0,03988 | 1,31629 | 0,85785 | 0,98762 | 0,36821 | 0,89974 |
| 32 | A0A6N0B6V8 | Outer membrane protein F                          | 0,00576 | 0,86939 | 0,00000 | 0,23332 | 0,03278 | 0,54027 |
| 33 | A0A6N0AAL1 | 6-phosphogluconate dehydrogenase, decarboxylating | 0,00496 | 1,46423 | 0,02114 | 1,33624 | 0,50815 | 1,03486 |
| 34 | A0A6N0B712 | DNA-directed RNA polymerase subunit alpha         | 0,97027 | 1,00171 | 0,02045 | 0,84084 | 0,02825 | 0,89482 |
| 35 | A0A6N0AME6 | Chaperone protein HtpG                            | 0,35814 | 0,94796 | 0,00002 | 0,75888 | 0,28798 | 0,88702 |
| 36 | A0A6N0B0F6 | Aldehyde-alcohol dehydrogenase                    | 0,00216 | 1,18886 | 0,09360 | 0,94741 | 0,60077 | 0,98873 |
| 37 | A0A6N0AMD5 | Polyribonucleotide nucleotidyltransferase         | 0,15596 | 1,09491 | 0,14010 | 1,09845 | 0,75320 | 1,00788 |
| 38 | A0A6N0AG29 | Phenylalanine--tRNA ligase beta subunit           | 0,08863 | 1,18504 | 0,07528 | 0,85110 | 0,10983 | 0,87332 |
| 39 | A0A6N0AQ96 | Ribonuclease E                                    | 0,76024 | 1,04996 | 0,23910 | 1,20162 | 0,05422 | 1,13127 |
| 40 | A0A6N0BAV5 | Periplasmic pH-dependent serine endoprotease DegQ | 0,00189 | 1,53756 | 0,03331 | 1,20218 | 0,06586 | 1,08213 |
| 41 | A0A6N0AKK0 | Glutamine synthetase                              | 0,01028 | 1,34443 | 0,75312 | 1,03011 | 0,08691 | 1,12320 |
| 42 | A0A6N0AYX3 | Malate dehydrogenase                              | 0,05079 | 0,66959 | 0,14484 | 0,88112 | 0,07877 | 1,36210 |
| 43 | A0A6N0AN74 | Phosphoserine aminotransferase                    | 0,00143 | 1,28587 | 0,00001 | 1,32105 | 0,03437 | 1,09152 |
| 44 | A0A6N0APB6 | Succinyl-CoA ligase [ADP-forming] subunit beta    | 0,81394 | 0,96802 | 0,01957 | 0,54421 | 0,00481 | 0,73196 |
| 45 | A0A6N0BHD7 | Phosphoribosylformylglycinamidine synthase        | 0,76638 | 0,95093 | 0,12809 | 1,16195 | 0,28282 | 1,17260 |
| 46 | A0A6N0AC21 | Asparagine synthetase B [glutamine-hydrolyzing]   | 0,01936 | 1,24695 | 0,00192 | 1,45123 | 0,00293 | 1,38565 |
| 47 | A0A6N0AD88 | Citrate synthase                                  | 0,12172 | 1,05496 | 0,03503 | 1,10477 | 0,00943 | 1,08017 |
| 48 | A0A6N0B1Z2 | Pyruvate kinase II                                | 0,18214 | 0,89585 | 0,01634 | 0,74021 | 0,01126 | 0,74788 |
| 49 | A0A6N0AXP2 | Transaldolase B                                   | 0,00028 | 1,28985 | 0,08865 | 1,05661 | 0,23608 | 1,01945 |
| 50 | A0A6N0BAU3 | Cysteine synthase A                               | 0,23226 | 0,96047 | 0,13146 | 0,95297 | 0,83718 | 1,01195 |
| 51 | A0A6N0BBN8 | Translation initiation factor IF-2                | 0,09853 | 1,16933 | 0,98043 | 0,99795 | 0,04957 | 0,90269 |
| 52 | A0A6N0AG83 | Flagellin 1                                       | 0,00006 | 0,00798 | 0,01857 | 1,22990 | 0,58581 | 0,81741 |
| 53 | A0A6N0AVH0 | Threonine synthase                                | 0,05298 | 1,43294 | 0,00952 | 1,30772 | 0,49949 | 1,09573 |
| 54 | A0A6N0BH82 | Alanine--tRNA ligase                              | 0,06149 | 0,90560 | 0,00074 | 0,65782 | 0,00008 | 0,82331 |
| 55 | A0A6N0API8 | 2-hydroxypropyl-CoM lyase                         | 0,40183 | 0,81821 | 0,55116 | 0,88228 | 0,16609 | 1,16203 |

|    |            |                                                           |         |         |         |         |         |         |
|----|------------|-----------------------------------------------------------|---------|---------|---------|---------|---------|---------|
| 56 | A0A6N0B2K0 | Peptidyl-prolyl cis-trans isomerase D                     | 0,03349 | 1,12083 | 0,00152 | 1,17428 | 0,15375 | 1,05169 |
| 57 | A0A6N0BIA0 | Serine hydroxymethyltransferase                           | 0,15339 | 1,19836 | 0,23434 | 1,12765 | 0,96873 | 0,99558 |
| 58 | A0A6N0AL81 | Uncharacterized protein                                   | 0,01621 | 1,24265 | 0,05486 | 1,16720 | 0,90844 | 0,99467 |
| 59 | A0A6N0ACS4 | Alcohol dehydrogenase 2                                   | 0,52742 | 1,03628 | 0,00381 | 0,69153 | 0,00062 | 0,70075 |
| 60 | A0A6N0AS49 | Phosphate acetyltransferase                               | 0,01727 | 1,17495 | 0,00020 | 1,38466 | 0,04156 | 1,10924 |
| 61 | A0A6N0BB31 | Outer membrane protein assembly factor BamA               | 0,00193 | 2,50341 | 0,15048 | 1,51768 | 0,01603 | 0,74658 |
| 62 | A0A6N0B776 | Dihydrolipoyl dehydrogenase                               | 0,01738 | 0,88683 | 0,01873 | 0,89444 | 0,86803 | 1,00473 |
| 63 | A0A6N0B8D8 | Glycerophosphoryl diester phosphodiesterase               | 0,08901 | 0,89092 | 0,00950 | 0,87175 | 0,11724 | 0,85472 |
| 64 | A0A6N0BIQ5 | 50S ribosomal protein L2                                  | 0,18908 | 0,80458 | 0,05476 | 1,25985 | 0,24992 | 1,26576 |
| 65 | A0A6N0AZ67 | Elongation factor Ts                                      | 0,57395 | 0,93856 | 0,36352 | 1,08240 | 0,91831 | 1,01024 |
| 66 | A0A6N0ASY5 | Adenylosuccinate synthetase                               | 0,02886 | 1,27531 | 0,77280 | 1,01600 | 0,10544 | 0,88120 |
| 67 | A0A6N0BBJ0 | Rod shape-determining protein MreB                        | 0,26019 | 1,08211 | 0,01803 | 0,85523 | 0,11128 | 0,82258 |
| 68 | A0A6N0B7Z8 | Bifunctional aspartokinase/homoserine dehydrogenase 1     | 0,05169 | 1,26556 | 0,13135 | 1,14842 | 0,02853 | 1,21066 |
| 69 | A0A6N0ABE3 | Uncharacterized protein                                   | 0,73345 | 1,04516 | 0,57911 | 1,07493 | 0,01485 | 1,22789 |
| 70 | A0A6N0AY02 | Succinate dehydrogenase flavoprotein subunit              | 0,00185 | 1,62433 | 0,01602 | 1,32048 | 0,19260 | 0,91829 |
| 71 | A0A6N0B8L0 | GDP-mannose 4,6-dehydratase                               | 0,04513 | 0,88186 | 0,80536 | 1,00575 | 0,14953 | 1,08397 |
| 72 | A0A6N0BEK9 | Fe(3+)-binding periplasmic protein                        | 0,01517 | 0,86268 | 0,00016 | 0,70901 | 0,00071 | 1,35190 |
| 73 | A0A6N0ARJ8 | Sulfate-binding protein                                   | 0,97943 | 0,99770 | 0,00715 | 1,48482 | 0,01447 | 1,17077 |
| 74 | A0A6N0BES5 | 2,3-bisphosphoglycerate-dependent phosphoglycerate mutase | 0,03305 | 0,59693 | 0,20416 | 0,83593 | 0,06392 | 1,29878 |
| 75 | A0A6N0BK46 | D-methionine-binding lipoprotein MetQ                     | 0,65935 | 0,97084 | 0,00528 | 1,23420 | 0,11950 | 1,17955 |
| 76 | A0A6N0B818 | Fructose-bisphosphate aldolase class 2                    | 0,07492 | 0,87794 | 0,00001 | 0,54639 | 0,04051 | 0,81284 |
| 77 | A0A6N0AVX9 | 30S ribosomal protein S3                                  | 0,07731 | 0,86400 | 0,00146 | 0,74121 | 0,12935 | 0,84738 |
| 78 | A0A6N0B031 | 50S ribosomal protein L1                                  | 0,13434 | 0,77733 | 0,02383 | 1,23028 | 0,26780 | 1,23407 |
| 79 | A0A6N0AQD6 | Glutamate/aspartate periplasmic-binding protein           | 0,00100 | 0,27062 | 0,04980 | 1,22894 | 0,04656 | 1,44403 |
| 80 | A0A6N0AW84 | ATP-dependent zinc metalloprotease FtsH                   | 0,11323 | 1,26378 | 0,30633 | 0,91142 | 0,21753 | 0,82698 |
| 81 | A0A6N0AXG5 | 30S ribosomal protein S2                                  | 0,01637 | 0,72755 | 0,00001 | 0,57659 | 0,25821 | 0,86902 |
| 82 | A0A6N0AW60 | Inosine-5'-monophosphate dehydrogenase                    | 0,32337 | 1,24490 | 0,34866 | 0,93256 | 0,36118 | 0,79461 |
| 83 | A0A6N0A960 | Protein translocase subunit SecD                          | 0,12062 | 1,11791 | 0,59279 | 1,03020 | 0,31493 | 1,04960 |
| 84 | A0A6N0ABE6 | ATP-dependent Clp protease ATP-binding subunit ClpA       | 0,02417 | 1,44457 | 0,01595 | 1,46119 | 0,37851 | 0,89943 |

|     |            |                                                                                                   |         |         |         |         |         |         |
|-----|------------|---------------------------------------------------------------------------------------------------|---------|---------|---------|---------|---------|---------|
| 85  | A0A6N0ABA8 | Dihydrolipoyllysine-residue succinyltransferase component of 2-oxoglutarate dehydrogenase complex | 0,10130 | 0,90403 | 0,10840 | 0,89535 | 0,42372 | 0,95381 |
| 86  | A0A6N0AHF5 | 50S ribosomal protein L5                                                                          | 0,34974 | 0,93466 | 0,01541 | 0,78817 | 0,05677 | 0,80154 |
| 87  | A0A6N0AVV3 | Uncharacterized protein                                                                           | 0,06609 | 1,10274 | 0,34293 | 0,94981 | 0,03539 | 0,91492 |
| 88  | A0A6N0BLC9 | Dihydrolipoyllysine-residue acetyltransferase component of pyruvate dehydrogenase complex         | 0,00286 | 0,60251 | 0,00218 | 1,43888 | 0,00110 | 1,97245 |
| 89  | A0A6N0ADN0 | Glutamine-binding periplasmic protein                                                             | 0,31959 | 1,17636 | 0,06344 | 1,40607 | 0,03750 | 1,07269 |
| 90  | A0A6N0AUY9 | Putative amino-acid-binding protein YxeM                                                          | 0,39363 | 0,81852 | 0,03462 | 1,23719 | 0,37091 | 1,26423 |
| 91  | A0A6N0B831 | 50S ribosomal protein L4                                                                          | 0,00300 | 0,89739 | 0,01068 | 0,88450 | 0,00242 | 0,83553 |
| 92  | A0A6N0BAJ7 | Oligopeptidase A                                                                                  | 0,33912 | 1,13932 | 0,17178 | 1,14499 | 0,95942 | 1,00506 |
| 93  | A0A6N0BBY6 | Putrescine-binding periplasmic protein                                                            | 0,96143 | 0,99548 | 0,00675 | 1,53891 | 0,24355 | 1,09353 |
| 94  | A0A6N0BB30 | Outer membrane protein TolC                                                                       | 0,16787 | 1,04551 | 0,15847 | 1,05698 | 0,55416 | 1,03786 |
| 95  | A0A6N0AGR8 | 30S ribosomal protein S4                                                                          | 0,08112 | 0,82698 | 0,19170 | 1,05532 | 0,48342 | 1,07566 |
| 96  | A0A6N0B591 | 3-oxoacyl-[acyl-carrier-protein] synthase 1                                                       | 0,02950 | 1,22621 | 0,01032 | 1,54975 | 0,00028 | 1,25368 |
| 97  | A0A6N0AKS4 | Putative peroxiredoxin                                                                            | 0,30275 | 0,74345 | 0,52678 | 0,95516 | 0,70985 | 1,13137 |
| 98  | A0A6N0AAK8 | Chemotaxis protein CheV                                                                           | 0,00619 | 2,11673 | 0,03297 | 1,81756 | 0,00032 | 0,83983 |
| 99  | A0A6N0AXW9 | 50S ribosomal protein L10                                                                         | 0,04600 | 0,90027 | 0,00032 | 0,64283 | 0,00695 | 0,86759 |
| 100 | A0A6N0AJK1 | Aspartate ammonia-lyase                                                                           | 0,03169 | 1,07893 | 0,62309 | 1,01082 | 0,00404 | 0,79247 |
| 101 | A0A6N0A824 | Argininosuccinate synthase                                                                        | 0,21668 | 1,12189 | 0,12145 | 1,16231 | 0,58139 | 0,97251 |
| 102 | A0A6N0AIL4 | Putative amino-acid ABC transporter-binding protein                                               | 0,00039 | 1,47094 | 0,00577 | 1,62501 | 0,00118 | 1,15741 |
| 103 | A0A6N0BNN1 | Leu/Ile/Val-binding protein                                                                       | 0,13489 | 0,57630 | 0,88694 | 1,03019 | 0,19001 | 1,34965 |
| 104 | A0A6N0BBA1 | 5-methyltetrahydropteroyltriglutamate--homocysteine methyltransferase                             | 0,06529 | 0,93214 | 0,41207 | 0,98323 | 0,44093 | 0,97152 |
| 105 | A0A6N0BCF9 | D-galactose-binding periplasmic protein                                                           | 0,00443 | 1,27894 | 0,03917 | 1,17555 | 0,00495 | 1,25458 |
| 106 | A0A6N0ATR5 | Sulfite reductase [NADPH] hemoprotein beta-component                                              | 0,89372 | 0,98661 | 0,45287 | 1,07636 | 0,64531 | 0,96342 |
| 107 | A0A6N0BMR8 | Phosphoenolpyruvate carboxykinase [ATP]                                                           | 0,12862 | 1,31476 | 0,02635 | 1,36762 | 0,44558 | 1,08869 |
| 108 | A0A6N0BDZ0 | Pyruvate kinase I                                                                                 | 0,13423 | 0,85900 | 0,00492 | 0,54801 | 0,00459 | 0,72216 |
| 109 | A0A6N0A9V6 | Glutathione-binding protein GsiB                                                                  | 0,69885 | 1,02406 | 0,00758 | 1,21432 | 0,33070 | 0,94482 |
| 110 | A0A6N0AFA2 | Uncharacterized protein                                                                           | 0,00010 | 0,32048 | 0,00059 | 1,42244 | 0,00023 | 1,61947 |
| 111 | A0A6N0BMC3 | S-adenosylmethionine synthase                                                                     | 0,67344 | 0,94848 | 0,00049 | 2,28498 | 0,01501 | 1,60500 |
| 112 | A0A6N0B8G8 | D-ribose-binding periplasmic protein                                                              | 0,16748 | 1,06062 | 0,02773 | 1,11440 | 0,00240 | 1,14397 |

|     |            |                                                                |         |         |         |         |         |         |
|-----|------------|----------------------------------------------------------------|---------|---------|---------|---------|---------|---------|
| 113 | A0A6N0BKQ0 | 3-isopropylmalate dehydratase large subunit 1                  | 0,00687 | 1,38201 | 0,00393 | 0,70050 | 0,00029 | 0,47409 |
| 114 | A0A6N0AT44 | Chemotaxis protein CheA                                        | 0,00233 | 0,42265 | 0,01132 | 0,70904 | 0,32893 | 0,78578 |
| 115 | A0A6N0AJK7 | Aspartate-semialdehyde dehydrogenase                           | 0,62515 | 1,03737 | 0,60846 | 1,03747 | 0,55667 | 1,04295 |
| 116 | A0A6N0BI02 | 50S ribosomal protein L9                                       | 0,01030 | 0,75023 | 0,00001 | 0,66949 | 0,33152 | 0,91933 |
| 117 | A0A6N0ACI6 | Ribose-phosphate pyrophosphokinase                             | 0,02914 | 1,23361 | 0,44651 | 1,06454 | 0,68362 | 1,01936 |
| 118 | A0A6N0AVE9 | 50S ribosomal protein L6                                       | 0,18458 | 1,07789 | 0,98320 | 0,99897 | 0,68120 | 0,98855 |
| 119 | A0A6N0AIX9 | ATP synthase gamma chain                                       | 0,18175 | 1,15152 | 0,79846 | 1,02537 | 0,28453 | 0,97072 |
| 120 | A0A6N0AUZ6 | Putative ABC transporter ATP-binding protein YjjK              | 0,14878 | 0,75301 | 0,11529 | 1,13726 | 0,59354 | 1,14336 |
| 121 | A0A6N0BJ85 | 50S ribosomal protein L3                                       | 0,16066 | 0,78129 | 0,07413 | 1,14182 | 0,22334 | 1,24230 |
| 122 | A0A6N0BAD7 | Glutamine--fructose-6-phosphate aminotransferase [isomerizing] | 0,00155 | 1,80829 | 0,09976 | 1,23133 | 0,00848 | 0,82714 |
| 123 | A0A6N0BHV4 | CTP synthase                                                   | 0,10508 | 1,15140 | 0,38465 | 0,94040 | 0,17456 | 0,92974 |
| 124 | A0A6N0AP75 | NAD-dependent malic enzyme                                     | 0,02024 | 3,09957 | 0,03788 | 2,45248 | 0,61164 | 0,88963 |
| 125 | A0A6N0AGK2 | NADH-quinone oxidoreductase subunit G                          | 0,30360 | 0,84142 | 0,77368 | 1,04990 | 0,68726 | 1,04640 |
| 126 | A0A6N0AIZ0 | 50S ribosomal protein L7/L12                                   | 0,00158 | 0,55146 | 0,01018 | 0,76084 | 0,00001 | 2,71550 |
| 127 | A0A6N0A8Q4 | Glutamate synthase [NADPH] small chain                         | 0,04673 | 1,36496 | 0,11049 | 1,49253 | 0,00136 | 1,29921 |
| 128 | A0A6N0AH41 | NADH-quinone oxidoreductase subunit F                          | 0,30614 | 1,11281 | 0,00506 | 1,27143 | 0,85351 | 0,97419 |
| 129 | A0A6N0BC61 | Phosphoenolpyruvate-protein phosphotransferase                 | 0,11056 | 1,37899 | 0,86935 | 0,96669 | 0,63219 | 0,96347 |
| 130 | A0A6N0AVI0 | Cytosol aminopeptidase                                         | 0,00016 | 1,77607 | 0,00025 | 1,41170 | 0,25674 | 0,91272 |
| 131 | A0A6N0A780 | Glycine--tRNA ligase beta subunit                              | 0,87899 | 1,01323 | 0,05134 | 0,77444 | 0,06769 | 0,87104 |
| 132 | A0A6N0ADU3 | Aspartate aminotransferase                                     | 0,04569 | 0,75356 | 0,19717 | 0,89211 | 0,12826 | 1,21026 |
| 133 | A0A6N0ARF6 | DNA-binding protein H-NS                                       | 0,89105 | 1,02341 | 0,00443 | 1,93670 | 0,15101 | 1,28151 |
| 134 | A0A6N0BHK2 | NADH-quinone oxidoreductase subunit C/D                        | 0,38339 | 0,92753 | 0,14156 | 0,87943 | 0,75200 | 0,97441 |
| 135 | A0A6N0AQQ9 | Aspartate--tRNA ligase                                         | 0,00176 | 1,54960 | 0,02138 | 1,26185 | 0,01144 | 0,78918 |
| 136 | A0A6N0AGF3 | Isoleucine--tRNA ligase                                        | 0,42774 | 1,20844 | 0,44557 | 1,11031 | 0,83767 | 0,95070 |
| 137 | A0A6N0B6R0 | Acetolactate synthase isozyme 3 large subunit                  | 0,93246 | 0,98853 | 0,02686 | 1,44282 | 0,00937 | 1,38723 |
| 138 | A0A6N0AQ3  | Outer membrane protein assembly factor BamC                    | 0,54176 | 1,17687 | 0,69386 | 1,08122 | 0,60001 | 1,09683 |
| 139 | A0A6N0BBD8 | ATP-dependent Clp protease ATP-binding subunit ClpX            | 0,00909 | 1,23894 | 0,22122 | 0,92420 | 0,55723 | 0,96277 |
| 140 | A0A6N0ADG0 | Glucans biosynthesis protein G                                 | 0,38281 | 1,06553 | 0,69328 | 1,05221 | 0,59190 | 1,07151 |
| 141 | A0A6N0BJY9 | 50S ribosomal protein L24                                      | 0,00165 | 0,84972 | 0,00001 | 0,49672 | 0,00499 | 0,81580 |
| 142 | A0A6N0AGF6 | Vitamin B12-binding protein                                    | 0,08251 | 1,42476 | 0,09938 | 1,28647 | 0,36267 | 1,14031 |

|     |            |                                                          |         |         |         |         |         |         |
|-----|------------|----------------------------------------------------------|---------|---------|---------|---------|---------|---------|
| 143 | A0A6N0APT0 | Thiol peroxidase                                         | 0,00220 | 1,21523 | 0,00517 | 1,14702 | 0,00316 | 1,15501 |
| 144 | A0A6N0AVX4 | Dihydroxy-acid dehydratase                               | 0,08605 | 1,24088 | 0,17541 | 0,82256 | 0,23017 | 1,06208 |
| 145 | A0A6N0AUB8 | Enoyl-[acyl-carrier-protein] reductase [NADH] FabI       | 0,95038 | 0,98701 | 0,89647 | 1,02722 | 0,79567 | 1,02202 |
| 146 | A0A6N0A9G1 | Ribonucleoside-diphosphate reductase 1 subunit alpha     | 0,28324 | 1,26337 | 0,09176 | 1,30759 | 0,27679 | 1,16384 |
| 147 | A0A6N0AJ33 | Proline--tRNA ligase                                     | 0,05086 | 1,68743 | 0,08670 | 1,55980 | 0,99784 | 1,00019 |
| 148 | A0A6N0ADF0 | Uncharacterized protein                                  | 0,07308 | 1,38604 | 0,03804 | 1,35517 | 0,22906 | 1,14525 |
| 149 | A0A6N0AHU9 | Periplasmic dipeptide transport protein                  | 0,04627 | 0,62017 | 0,01243 | 0,78548 | 0,34358 | 0,72973 |
| 150 | A0A6N0AKM9 | ATP synthase subunit b                                   | 0,93056 | 1,00765 | 0,00914 | 1,22597 | 0,44548 | 1,08703 |
| 151 | A0A6N0AAE7 | Phosphoglucomutase                                       | 0,00893 | 6,82999 | 0,02750 | 2,50826 | 0,52022 | 0,83779 |
| 152 | A0A6N0B8V3 | Acetyl-coenzyme A synthetase                             | 0,20880 | 0,81456 | 0,51612 | 1,08114 | 0,36529 | 1,15407 |
| 153 | A0A6N0BHM4 | Lysine-arginine-ornithine-binding periplasmic protein    | 0,78280 | 0,98614 | 0,00590 | 1,23065 | 0,12754 | 1,10584 |
| 154 | A0A6N0B8P1 | Triosephosphate isomerase                                | 0,02054 | 0,85403 | 0,00143 | 0,72176 | 0,35434 | 0,95590 |
| 155 | A0A6N0AA80 | DNA-binding protein HU-alpha                             | 0,03730 | 1,28692 | 0,00002 | 1,72754 | 0,03567 | 1,25249 |
| 156 | A0A6N0AK18 | Modulator of FtsH protease HflK                          | 0,45499 | 1,17333 | 0,27400 | 1,13046 | 0,90075 | 1,03018 |
| 157 | A0A6N0AIH5 | Cell division protein FtsZ                               | 0,18802 | 1,15331 | 0,82343 | 0,97702 | 0,00622 | 0,85238 |
| 158 | A0A6N0BIG4 | 30S ribosomal protein S7                                 | 0,53565 | 0,89854 | 0,08952 | 0,86867 | 0,34370 | 0,83280 |
| 159 | A0A6N0A9K2 | Succinyl-CoA ligase [ADP-forming] subunit alpha          | 0,87262 | 1,01425 | 0,00006 | 1,61908 | 0,19235 | 1,28157 |
| 160 | A0A6N0BJT9 | Bifunctional polymyxin resistance protein ArnA           | 0,49026 | 1,35171 | 0,08111 | 1,64055 | 0,01286 | 2,43347 |
| 161 | A0A6N0ABF6 | Serine--tRNA ligase                                      | 0,21140 | 1,17374 | 0,01173 | 1,51432 | 0,01302 | 1,22363 |
| 162 | A0A6N0ANX1 | Phosphoribosylaminoimidazole-succinocarboxamide synthase | 0,17513 | 1,15684 | 0,01592 | 1,34686 | 0,03403 | 1,18103 |
| 163 | A0A6N0BC06 | Succinate dehydrogenase iron-sulfur subunit              | 0,14507 | 1,05848 | 0,44514 | 0,97004 | 0,03558 | 1,07430 |
| 164 | A0A6N0AWV6 | GTP-binding protein TypA/BipA                            | 0,00122 | 0,49289 | 0,00422 | 0,63224 | 0,61466 | 1,11191 |
| 165 | A0A6N0AGQ9 | FKBP-type peptidyl-prolyl cis-trans isomerase FkpA       | 0,00726 | 1,59034 | 0,05061 | 1,79650 | 0,02855 | 1,33710 |
| 166 | A0A6N0ARS9 | Protein RecA                                             | 0,00007 | 2,58795 | 0,20971 | 0,92234 | 0,84179 | 0,98839 |
| 167 | A0A6N0BE90 | NH(3)-dependent NAD(+) synthetase                        | 0,14498 | 0,93096 | 0,01018 | 1,15752 | 0,00124 | 1,21282 |
| 168 | A0A6N0BFR0 | 3-oxoacyl-[acyl-carrier-protein] reductase FabG          | 0,81181 | 0,96513 | 0,28644 | 1,18134 | 0,17850 | 1,07167 |
| 169 | A0A6N0BBS5 | Outer membrane protein X                                 | 0,00011 | 2,05299 | 0,00107 | 0,85199 | 0,33524 | 0,85741 |
| 170 | A0A6N0BGF8 | Methyl-accepting chemotaxis protein III                  | 0,01701 | 0,55486 | 0,00780 | 1,50002 | 0,10479 | 1,29222 |
| 171 | A0A6N0ATH2 | Acetylornithine/succinyldiaminopimelate aminotransferase | 0,94215 | 1,01278 | 0,00583 | 1,86909 | 0,02357 | 1,68765 |
| 172 | A0A6N0A987 | Phosphoenolpyruvate carboxylase                          | 0,82345 | 0,93442 | 0,13961 | 0,64939 | 0,35563 | 0,76075 |



|     |            |                                                                  |         |         |         |         |         |         |
|-----|------------|------------------------------------------------------------------|---------|---------|---------|---------|---------|---------|
| 173 | A0A6N0A9K7 | Protein TolB                                                     | 0,00195 | 1,36654 | 0,43587 | 1,04109 | 0,95664 | 0,99148 |
| 174 | A0A6N0AL00 | 3-carboxy-cis,cis-muconate cycloisomerase                        | 0,00023 | 2,10515 | 0,00085 | 1,70898 | 0,98693 | 1,00068 |
| 175 | A0A6N0AD51 | Leucine--tRNA ligase                                             | 0,12871 | 1,26771 | 0,00101 | 1,70612 | 0,08611 | 1,24753 |
| 176 | A0A6N0B112 | Septum site-determining protein MinD                             | 0,04466 | 1,20527 | 0,01126 | 1,26430 | 0,23157 | 1,07170 |
| 177 | A0A6N0B8N1 | ATP-dependent protease ATPase subunit HslU                       | 0,48363 | 1,11211 | 0,11927 | 1,22395 | 0,83118 | 1,02268 |
| 178 | A0A6N0ACH9 | Iron uptake system component EfeO                                | 0,29980 | 1,13324 | 0,07466 | 1,26479 | 0,00003 | 1,66653 |
| 179 | A0A6N0BJB5 | GMP synthase [glutamine-hydrolyzing]                             | 0,02991 | 1,46498 | 0,11597 | 0,74718 | 0,02580 | 0,65935 |
| 180 | A0A6N0AN25 | Valine--tRNA ligase                                              | 0,00070 | 1,54511 | 0,25969 | 0,80381 | 0,51181 | 0,96807 |
| 181 | A0A6N0BHD6 | 50S ribosomal protein L22                                        | 0,19692 | 0,41727 | 0,49453 | 0,67285 | 0,54923 | 1,42038 |
| 182 | A0A6N0AE52 | Adenylosuccinate lyase                                           | 0,21954 | 1,13356 | 0,21734 | 1,14759 | 0,55907 | 0,94563 |
| 183 | A0A6N0B0A8 | Methionine--tRNA ligase                                          | 0,00542 | 1,16542 | 0,00581 | 1,28763 | 0,15048 | 1,08505 |
| 184 | A0A6N0BHX4 | Bifunctional protein HldE                                        | 0,49347 | 1,11489 | 0,34528 | 0,87015 | 0,43545 | 0,90602 |
| 185 | A0A6N0ATA7 | 30S ribosomal protein S8                                         | 0,00449 | 0,77782 | 0,05416 | 0,89833 | 0,06656 | 0,91678 |
| 186 | A0A6N0ATJ6 | PTS system mannose-specific EIIB component                       | 0,14019 | 0,81149 | 0,02986 | 1,27265 | 0,50569 | 1,06041 |
| 187 | A0A6N0AGH9 | Aminopeptidase N                                                 | 0,00577 | 1,51532 | 0,00004 | 1,50452 | 0,16910 | 1,11893 |
| 188 | A0A6N0AYC1 | Peptidoglycan-associated lipoprotein                             | 0,72460 | 0,94364 | 0,43694 | 1,07333 | 0,54125 | 1,13962 |
| 189 | A0A6N0BGD8 | Oligogalacturonate-specific porin KdGM                           | 0,05859 | 0,84589 | 0,52674 | 0,96292 | 0,52290 | 0,95716 |
| 190 | A0A6N0AMP5 | Phosphoribosylamine--glycine ligase                              | 0,34794 | 0,91416 | 0,53559 | 1,09379 | 0,08163 | 1,24969 |
| 191 | A0A6N0ASG4 | Acetate kinase                                                   | 0,13011 | 1,22230 | 0,01469 | 0,83069 | 0,11799 | 0,79491 |
| 192 | A0A6N0BKC3 | 30S ribosomal protein S6                                         | 0,95554 | 0,98659 | 0,00868 | 1,93944 | 0,02357 | 1,92193 |
| 193 | A0A6N0ALR6 | UTP--glucose-1-phosphate uridylyltransferase                     | 0,00280 | 1,78642 | 0,04903 | 1,30902 | 0,19791 | 0,93296 |
| 194 | A0A6N0ANC0 | L-glyceraldehyde 3-phosphate reductase                           | 0,87908 | 0,96875 | 0,97844 | 0,99430 | 0,00816 | 1,12839 |
| 195 | A0A6N0AXG4 | Acetyl-coenzyme A carboxylase carboxyl transferase subunit alpha | 0,00049 | 2,25602 | 0,00111 | 2,10096 | 0,64222 | 0,96979 |
| 196 | A0A6N0A9J2 | Uracil phosphoribosyltransferase                                 | 0,00053 | 0,73527 | 0,00009 | 0,71031 | 0,03994 | 0,88703 |
| 197 | A0A6N0BMC4 | 50S ribosomal protein L16                                        | 0,09190 | 0,92422 | 0,33150 | 0,97142 | 0,56482 | 0,94685 |
| 198 | A0A6N0BJ16 | Fumarate reductase flavoprotein subunit                          | 0,07855 | 0,86684 | 0,01000 | 1,13649 | 0,09468 | 0,81652 |
| 199 | A0A6N0AIJ2 | 3-isopropylmalate dehydrogenase                                  | 0,00522 | 1,47449 | 0,24436 | 1,12508 | 0,15700 | 0,89960 |
| 200 | A0A6N0B8Q9 | Bifunctional purine biosynthesis protein PurH                    | 0,04973 | 0,73462 | 0,00657 | 1,25545 | 0,27046 | 1,22485 |
| 201 | A0A6N0AFU0 | 2-dehydro-3-deoxyphosphooctonate aldolase                        | 0,02414 | 1,14145 | 0,00184 | 0,73617 | 0,00295 | 0,81921 |
| 202 | A0A6N0AXT5 | Modulator of FtsH protease HflC                                  | 0,00014 | 1,81509 | 0,00012 | 1,69184 | 0,57805 | 1,04170 |

|     |            |                                                          |         |         |         |         |         |         |
|-----|------------|----------------------------------------------------------|---------|---------|---------|---------|---------|---------|
| 203 | A0A6N0ART2 | Asparagine--tRNA ligase                                  | 0,29926 | 0,89496 | 0,01624 | 0,62811 | 0,07505 | 0,64304 |
| 204 | A0A6N0AJL8 | Tryptophan--tRNA ligase                                  | 0,00241 | 2,11444 | 0,00026 | 2,28868 | 0,86050 | 1,02191 |
| 205 | A0A6N0AV63 | Argininosuccinate lyase                                  | 0,42595 | 1,13707 | 0,11193 | 1,27076 | 0,13275 | 1,15473 |
| 206 | A0A6N0B620 | Sulfite reductase [NADPH] flavoprotein alpha-component   | 0,48103 | 1,14628 | 0,03766 | 2,05943 | 0,66869 | 1,04095 |
| 207 | A0A6N0AIU7 | Carbamoyl-phosphate synthase small chain                 | 0,94534 | 0,99339 | 0,01299 | 1,37793 | 0,00457 | 1,19584 |
| 208 | A0A6N0AZR2 | Glucose-specific phosphotransferase enzyme IIA component | 0,13567 | 1,07311 | 0,00039 | 1,37087 | 0,10077 | 1,17610 |
| 209 | A0A6N0BDS3 | ATP phosphoribosyltransferase                            | 0,47438 | 1,12213 | 0,76256 | 0,95915 | 0,35438 | 0,89686 |
| 210 | A0A6N0BBU3 | 4-hydroxy-tetrahydrodipicolinate synthase                | 0,42084 | 1,09454 | 0,81022 | 1,02318 | 0,19514 | 1,10590 |
| 211 | A0A6N0BH32 | Glutathione synthetase                                   | 0,00425 | 2,72790 | 0,00124 | 3,09581 | 0,11849 | 1,23026 |
| 212 | A0A6N0AD36 | UDP-glucose 6-dehydrogenase                              | 0,03981 | 1,19972 | 0,01598 | 0,87347 | 0,06114 | 0,82502 |
| 213 | A0A6N0ASJ1 | Thioredoxin reductase                                    | 0,92612 | 0,98832 | 0,17289 | 1,16114 | 0,04865 | 1,26851 |
| 214 | A0A2K8VY47 | Chaperone SurA                                           | 0,09174 | 1,62416 | 0,00981 | 2,08602 | 0,16463 | 1,20056 |
| 215 | A0A6N0BMB3 | 30S ribosomal protein S5                                 | 0,00381 | 0,84773 | 0,00005 | 0,61691 | 0,03784 | 0,88806 |
| 216 | A0A6N0AZK5 | Adenylate kinase                                         | 0,22315 | 0,81546 | 0,23345 | 1,10635 | 0,39516 | 1,15842 |
| 217 | A0A6N0B7M5 | ATP synthase subunit delta                               | 0,08974 | 0,66323 | 0,24625 | 0,81989 | 0,19453 | 1,24509 |
| 218 | A0A6N0B632 | General stress protein 69                                | 0,05642 | 2,00076 | 0,00095 | 3,62952 | 0,39277 | 1,12280 |
| 219 | A0A6N0AIR2 | 2-isopropylmalate synthase                               | 0,03569 | 0,40261 | 0,25693 | 0,70109 | 0,16289 | 1,34601 |
| 220 | A0A6N0B2W0 | Uncharacterized protein                                  | 0,01626 | 0,65854 | 0,00237 | 1,53704 | 0,60770 | 1,04742 |
| 221 | A0A6N0AYR4 | Catalase-peroxidase                                      | 0,81085 | 1,05364 | 0,00173 | 2,08803 | 0,00139 | 2,36121 |
| 222 | A0A6N0ARE9 | NAD(P)H nitroreductase YdjA                              | 0,79186 | 1,04220 | 0,71542 | 0,95247 | 0,21593 | 1,18799 |
| 223 | A0A6N0ACQ0 | Peroxiredoxin bcp                                        | 0,00268 | 1,21773 | 0,00019 | 0,74491 | 0,00255 | 0,79051 |
| 224 | A0A6N0AF95 | Periplasmic serine endoprotease DegP                     | 0,01620 | 2,99824 | 0,40622 | 1,35366 | 0,33500 | 1,20336 |
| 225 | A0A6N0B5N4 | 30S ribosomal protein S10                                | 0,00221 | 0,59315 | 0,00048 | 0,44698 | 0,15513 | 0,90541 |
| 226 | A0A6N0ADU6 | Formate dehydrogenase-O major subunit                    | 0,55537 | 1,11916 | 0,67061 | 0,96738 | 0,24921 | 0,78161 |
| 227 | A0A6N0AUS8 | Aerobic respiration control protein ArcA                 | 0,41700 | 1,12448 | 0,11442 | 1,21446 | 0,79673 | 1,04022 |
| 228 | A0A6N0B672 | Outer membrane protein assembly factor BamB              | 0,32982 | 1,22159 | 0,06602 | 1,39820 | 0,79626 | 1,04687 |
| 229 | A0A6N0AT12 | Peptidase B                                              | 0,29493 | 1,09851 | 0,44429 | 0,94080 | 0,69280 | 1,02247 |
| 230 | A0A6N0AI34 | Inorganic pyrophosphatase                                | 0,03444 | 0,85660 | 0,00011 | 0,29872 | 0,00014 | 0,57573 |
| 231 | A0A6N0AMS6 | Cytochrome bd-I ubiquinol oxidase subunit 1              | 0,05609 | 0,77266 | 0,04471 | 0,76401 | 0,00230 | 0,64370 |
| 232 | A0A6N0B8W4 | PTS system mannitol-specific EIICBA component            | 0,70740 | 0,92412 | 0,93537 | 0,98779 | 0,10172 | 1,36425 |



|     |            |                                                                    |         |         |         |         |         |         |
|-----|------------|--------------------------------------------------------------------|---------|---------|---------|---------|---------|---------|
| 233 | A0A6N0B1Z5 | Major phosphate-irrepressible acid phosphatase                     | 0,00592 | 0,38262 | 0,31226 | 1,13501 | 0,05373 | 0,85841 |
| 234 | A0A6N0BBV4 | Cold shock-like protein CspE                                       | 0,00547 | 1,28486 | 0,00514 | 0,43848 | 0,01803 | 0,68921 |
| 235 | A0A6N0ASX1 | Biosynthetic arginine decarboxylase                                | 0,00101 | 3,15235 | 0,01024 | 2,57119 | 0,34586 | 1,12798 |
| 236 | A0A6N0B974 | 6-phosphofructokinase isozyme 1                                    | 0,86768 | 0,97300 | 0,68738 | 1,05954 | 0,69011 | 1,04826 |
| 237 | A0A6N0AFS3 | Protein translocase subunit SecA                                   | 0,03114 | 1,64354 | 0,49198 | 1,24558 | 0,12037 | 0,59716 |
| 238 | A0A6N0AL83 | DNA gyrase subunit A                                               | 0,87042 | 1,01848 | 0,00052 | 1,31615 | 0,18580 | 1,18107 |
| 239 | A0A6N0BD39 | Thioredoxin                                                        | 0,33217 | 1,27276 | 0,00665 | 2,15078 | 0,18546 | 1,42257 |
| 240 | A0A6N0B2Y4 | Ferrichrome-iron receptor                                          | 0,79197 | 0,81545 | 0,59793 | 1,29402 | 0,57809 | 0,66083 |
| 241 | A0A6N0AT47 | Glucose-6-phosphate isomerase                                      | 0,50373 | 1,18239 | 0,55603 | 1,16898 | 0,65603 | 1,02669 |
| 242 | A0A6N0AFN3 | Phage shock protein A                                              | 0,39875 | 0,88745 | 0,00122 | 1,28996 | 0,19296 | 0,79299 |
| 243 | A0A6N0AW53 | Uncharacterized protein                                            | 0,02273 | 0,75267 | 0,04224 | 0,86806 | 0,83497 | 0,97366 |
| 244 | A0A6N0ACU7 | Mannose-6-phosphate isomerase                                      | 0,00525 | 1,38851 | 0,33684 | 0,85623 | 0,07591 | 0,79836 |
| 245 | A0A6N0BDC0 | 50S ribosomal protein L25                                          | 0,47301 | 0,85924 | 0,15213 | 0,69211 | 0,14539 | 0,72862 |
| 246 | A0A6N0BM05 | Vitamin B12 transporter BtuB                                       | 0,14167 | 1,37450 | 0,02208 | 1,66146 | 0,90763 | 1,01195 |
| 247 | A0A6N0A805 | Purine nucleoside phosphorylase DeoD-type                          | 0,05193 | 1,50957 | 0,47988 | 1,10806 | 0,17724 | 0,84939 |
| 248 | A0A6N0ANT6 | Uncharacterized protein                                            | 0,18955 | 0,83425 | 0,01224 | 1,30696 | 0,48306 | 1,09427 |
| 249 | A0A6N0AKT8 | 2,3,4,5-tetrahydropyridine-2,6-dicarboxylate N-succinyltransferase | 0,90502 | 1,00663 | 0,00042 | 0,66875 | 0,03371 | 0,84047 |
| 250 | A0A6N0B7X5 | 5,10-methylenetetrahydrofolate reductase                           | 0,01395 | 0,77516 | 0,34063 | 0,93957 | 0,46749 | 1,06398 |
| 251 | A0A6N0AY12 | 10 kDa chaperonin                                                  | 0,00037 | 0,29591 | 0,17639 | 0,63569 | 0,67357 | 0,90979 |
| 252 | A0A6N0BJ22 | 50S ribosomal protein L15                                          | 0,01670 | 0,66411 | 0,03250 | 0,72944 | 0,53719 | 0,92992 |
| 253 | A0A6N0B9G6 | Alcohol dehydrogenase YqhD                                         | 0,74984 | 1,05683 | 0,18268 | 0,73416 | 0,07246 | 0,85609 |
| 254 | A0A6N0ANV8 | Phosphoribosylformylglycinamidine cyclo-ligase                     | 0,53027 | 1,07468 | 0,66182 | 1,05702 | 0,93620 | 1,01848 |
| 255 | A0A6N0BHK3 | Sulfate adenylyltransferase subunit 1                              | 0,01356 | 0,71651 | 0,06411 | 1,14082 | 0,05415 | 1,32979 |
| 256 | A0A6N0AXL0 | Multidrug efflux pump subunit AcrA                                 | 0,85192 | 1,03523 | 0,41112 | 1,09646 | 0,47490 | 1,11640 |
| 257 | A0A6N0BIX2 | Branched-chain-amino-acid aminotransferase                         | 0,37441 | 1,29858 | 0,55869 | 1,14557 | 0,22370 | 1,23064 |
| 258 | A0A6N0AGS8 | S-ribosylhomocysteine lyase                                        | 0,10636 | 0,81471 | 0,05666 | 0,78869 | 0,29340 | 0,90991 |
| 259 | A0A6N0AUW7 | Acetylglutamate kinase                                             | 0,00165 | 1,30130 | 0,01483 | 1,24583 | 0,15106 | 1,12632 |
| 260 | A0A6N0BK33 | cAMP-activated global transcriptional regulator CRP                | 0,87223 | 0,96544 | 0,00687 | 1,92157 | 0,79252 | 1,06351 |
| 261 | A0A6N0AM80 | 50S ribosomal protein L21                                          | 0,08443 | 0,65579 | 0,03294 | 1,46144 | 0,14862 | 1,50726 |
| 262 | A0A6N0AHP1 | Nucleoside diphosphate kinase                                      | 0,63086 | 0,98861 | 0,01155 | 0,86966 | 0,87861 | 0,99633 |

|     |            |                                                   |         |         |         |         |         |         |
|-----|------------|---------------------------------------------------|---------|---------|---------|---------|---------|---------|
| 263 | A0A6N0AVN6 | Transcriptional regulatory protein OmpR           | 0,35850 | 1,35801 | 0,09040 | 1,74402 | 0,83084 | 1,05734 |
| 264 | A0A6N0AIR5 | Osmotically-inducible protein Y                   | 0,97942 | 1,00530 | 0,01130 | 1,53776 | 0,33962 | 1,27210 |
| 265 | A0A6N0BBU2 | Periplasmic dipeptide transport protein           | 0,25167 | 0,75194 | 0,84125 | 0,97160 | 0,90259 | 1,04662 |
| 266 | A0A6N0BIQ6 | Phosphomannomutase/phosphoglucomutase             | 0,95992 | 1,01884 | 0,85070 | 0,93325 | 0,22309 | 0,76420 |
| 267 | A0A2K8VTD8 | Arginine--tRNA ligase                             | 0,43171 | 0,82034 | 0,54612 | 0,86788 | 0,66819 | 1,04625 |
| 268 | A0A6N0A915 | N-acetyl-gamma-glutamyl-phosphate reductase       | 0,35035 | 1,09517 | 0,01305 | 0,66365 | 0,03021 | 0,83117 |
| 269 | A0A6N0ABD6 | ABC transporter arginine-binding protein 2        | 0,02738 | 1,75284 | 0,01916 | 1,78976 | 0,78198 | 0,93334 |
| 270 | A0A6N0BCX3 | DNA-binding protein HU-beta                       | 0,00261 | 0,77552 | 0,93319 | 0,99702 | 0,00208 | 1,20346 |
| 271 | A0A6N0B633 | Aromatic-amino-acid aminotransferase              | 0,74768 | 0,89054 | 0,47584 | 0,77675 | 0,85661 | 0,95324 |
| 272 | A0A6N0B8P5 | Aldehyde dehydrogenase B                          | 0,39990 | 0,78288 | 0,04417 | 1,47417 | 0,16280 | 1,36328 |
| 273 | A0A6N0A8I6 | NADP-dependent malic enzyme                       | 0,00647 | 1,71556 | 0,00531 | 1,86478 | 0,10140 | 1,24973 |
| 274 | A0A6N0ABY0 | Tryptophan synthase beta chain                    | 0,80885 | 0,95175 | 0,00069 | 1,63933 | 0,01825 | 1,73193 |
| 275 | A0A6N0AXE2 | Uncharacterized protein                           | 0,37238 | 1,12933 | 0,02771 | 1,40840 | 0,19016 | 1,14424 |
| 276 | A0A6N0AXS3 | Uncharacterized protein                           | 0,00257 | 1,54018 | 0,04429 | 1,13839 | 0,03318 | 0,80229 |
| 277 | A0A6N0B7Y6 | Lysine-sensitive aspartokinase 3                  | 0,11165 | 0,54689 | 0,14430 | 0,67542 | 0,51312 | 1,20671 |
| 278 | A0A6N0BI12 | Ribonuclease R                                    | 0,00305 | 1,41558 | 0,07805 | 1,16275 | 0,29617 | 0,86668 |
| 279 | A0A6N0A802 | UDP-N-acetylglucosamine 1-carboxyvinyltransferase | 0,13211 | 0,77512 | 0,05875 | 0,73883 | 0,29917 | 1,11498 |
| 280 | A0A6N0A6E0 | Superoxide dismutase [Mn]                         | 0,60241 | 1,10087 | 0,00003 | 3,08577 | 0,00341 | 2,03166 |
| 281 | A0A6N0B030 | Ribosome-recycling factor                         | 0,46159 | 0,88050 | 0,51066 | 0,85542 | 0,47639 | 0,79630 |
| 282 | A0A6N0AIT6 | Thioredoxin-1                                     | 0,01872 | 1,17953 | 0,06009 | 0,86866 | 0,03492 | 0,93058 |
| 283 | A0A6N0AKI9 | DNA-directed RNA polymerase subunit omega         | 0,33462 | 0,92559 | 0,01100 | 0,73816 | 0,37625 | 0,94934 |
| 284 | A0A6N0B8S8 | Biotin carboxylase                                | 0,05624 | 1,10176 | 0,92467 | 1,00342 | 0,21748 | 0,90472 |
| 285 | A0A6N0AF74 | Chemotaxis protein CheY                           | 0,02714 | 0,58608 | 0,47452 | 1,12170 | 0,14316 | 1,14242 |
| 286 | A0A6N0B0S2 | Tryptophan synthase alpha chain                   | 0,14027 | 0,80617 | 0,00393 | 1,26934 | 0,01725 | 1,55037 |
| 287 | A0A6N0AN16 | DNA protection during starvation protein          | 0,71186 | 1,14148 | 0,00098 | 6,55255 | 0,00009 | 5,62736 |
| 288 | A0A6N0AG39 | 3-oxoacyl-[acyl-carrier-protein] synthase 3       | 0,00144 | 1,63160 | 0,29006 | 1,03877 | 0,85496 | 0,97814 |
| 289 | A0A6N0AWS8 | Universal stress protein A                        | 0,12041 | 1,35839 | 0,00927 | 1,53533 | 0,64069 | 0,91072 |
| 290 | A0A6N0AWP5 | Cystathionine gamma-synthase                      | 0,44825 | 0,96244 | 0,04351 | 0,83609 | 0,17934 | 1,03915 |
| 291 | A0A6N0BAH9 | Ribonuclease PH                                   | 0,91185 | 1,02173 | 0,04343 | 1,40748 | 0,08217 | 1,40464 |
| 292 | A0A6N0AL50 | 6,7-dimethyl-8-ribityllumazine synthase           | 0,54941 | 0,84695 | 0,14899 | 0,57854 | 0,41282 | 1,06019 |
| 293 | A0A6N0AB00 | Adenine phosphoribosyltransferase                 | 0,18675 | 0,80964 | 0,02080 | 0,44201 | 0,34452 | 1,08326 |

|     |            |                                                            |         |         |         |         |         |         |
|-----|------------|------------------------------------------------------------|---------|---------|---------|---------|---------|---------|
| 294 | A0A6N0A9Y2 | Alkyl hydroperoxide reductase subunit C                    | 0,15091 | 0,66837 | 0,00003 | 4,76460 | 0,00004 | 6,35725 |
| 295 | A0A6N0BG99 | Nucleoid-associated protein YejK                           | 0,79867 | 0,88525 | 0,37643 | 0,61160 | 0,63207 | 0,83854 |
| 296 | A0A6N0BAC9 | Ornithine carbamoyltransferase chain I                     | 0,91080 | 0,98556 | 0,03206 | 1,38560 | 0,27464 | 1,18672 |
| 297 | A0A6N0B602 | Peptidyl-prolyl cis-trans isomerase B                      | 0,14730 | 0,74047 | 0,80296 | 1,04514 | 0,00419 | 1,84478 |
| 298 | A0A6N0B689 | 30S ribosomal protein S16                                  | 0,00006 | 0,87281 | 0,00000 | 0,66704 | 0,00011 | 0,84841 |
| 299 | A0A6N0AVB9 | 30S ribosomal protein S13                                  | 0,31258 | 0,76941 | 0,00399 | 1,49486 | 0,50469 | 1,23091 |
| 300 | A0A2K8VYT1 | 30S ribosomal protein S11                                  | 0,78816 | 0,97621 | 0,00039 | 1,66363 | 0,00658 | 1,52169 |
| 301 | A0A6N0A7R6 | 50S ribosomal protein L11                                  | 0,27417 | 1,31732 | 0,78728 | 1,07185 | 0,02421 | 0,88459 |
| 302 | A0A6N0AWC1 | Autonomous glycyl radical cofactor                         | 0,51906 | 0,86012 | 0,23906 | 0,75361 | 0,17838 | 0,74546 |
| 303 | A0A6N0ATK8 | Cysteine desulfurase                                       | 0,35327 | 0,92018 | 0,08733 | 1,15573 | 0,83314 | 1,02813 |
| 304 | A0A6N0BKH3 | Phospho-2-dehydro-3-deoxyheptonate aldolase, Tyr-sensitive | 0,50823 | 1,06410 | 0,57043 | 1,06282 | 0,81632 | 0,97736 |
| 305 | A0A6N0BFC9 | ABC transporter substrate-binding protein YesO             | 0,81287 | 1,05089 | 0,00571 | 1,82098 | 0,45034 | 0,83952 |
| 306 | A0A6N0AS38 | NADH-quinone oxidoreductase subunit B                      | 0,07001 | 0,84364 | 0,26359 | 1,10733 | 0,19285 | 1,10974 |
| 307 | A0A6N0BHZ7 | D-3-phosphoglycerate dehydrogenase                         | 0,17212 | 1,47488 | 0,33112 | 1,25421 | 0,49995 | 1,12719 |
| 308 | A0A6N0BFC7 | Vitamin B12-binding protein                                | 0,87745 | 1,11560 | 0,43346 | 0,65024 | 0,32300 | 1,87950 |
| 309 | A0A6N0AR21 | Leucine-responsive regulatory protein                      | 0,01911 | 0,82032 | 0,00096 | 1,44068 | 0,04963 | 1,16110 |
| 310 | A0A6N0AMQ6 | D-alanyl-D-alanine carboxypeptidase DacA                   | 0,97315 | 0,99390 | 0,01772 | 0,67484 | 0,58737 | 0,89097 |
| 311 | A0A6N0AK79 | Uncharacterized protein                                    | 0,01255 | 2,34919 | 0,00199 | 3,00759 | 0,00291 | 1,42318 |
| 312 | A0A6N0BAA2 | Lysine--tRNA ligase                                        | 0,20847 | 0,70422 | 0,09128 | 1,25641 | 0,11165 | 1,53736 |
| 313 | A0A6N0APD8 | Fumarate hydratase class I, aerobic                        | 0,21047 | 0,90527 | 0,25661 | 1,21818 | 0,33170 | 0,79381 |
| 314 | A0A6N0BA28 | Membrane protein insertase YidC                            | 0,02257 | 1,30162 | 0,00396 | 1,21932 | 0,36701 | 1,06496 |
| 315 | A0A6N0AU66 | Glutamate--tRNA ligase                                     | 0,99956 | 0,99984 | 0,38288 | 1,12188 | 0,53248 | 1,16356 |
| 316 | A0A6N0B047 | Multidrug efflux pump subunit AcrB                         | 0,91311 | 0,98421 | 0,62177 | 0,95695 | 0,39293 | 1,12737 |
| 317 | A0A6N0AZU4 | D-methionine-binding lipoprotein MetQ                      | 0,59882 | 1,14580 | 0,05637 | 1,63864 | 0,19400 | 1,15693 |
| 318 | A0A6N0AGA6 | Uncharacterized protein                                    | 0,04511 | 0,84156 | 0,15099 | 0,88621 | 0,31275 | 0,96300 |
| 319 | A0A6N0AI45 | Putative hydrolase YxeP                                    | 0,00133 | 3,36004 | 0,00100 | 3,30366 | 0,89179 | 0,97234 |
| 320 | A0A6N0ARC4 | Carbohydrate acetyl esterase/feruloyl esterase             | 0,62476 | 1,16962 | 0,00764 | 2,40469 | 0,73487 | 1,09410 |
| 321 | A0A6N0BEP3 | Hydrogen peroxide-inducible genes activator                | 0,08469 | 1,32940 | 0,34084 | 1,17081 | 0,28734 | 1,10583 |
| 322 | A0A6N0BEI8 | Chaperone protein Skp                                      | 0,56132 | 1,08634 | 0,41285 | 1,12048 | 0,01264 | 1,19153 |
| 323 | A0A6N0AFG9 | 30S ribosomal protein S18                                  | 0,02131 | 0,79457 | 0,01235 | 0,80197 | 0,98759 | 0,99871 |

|     |            |                                                      |         |         |         |         |         |         |
|-----|------------|------------------------------------------------------|---------|---------|---------|---------|---------|---------|
| 324 | A0A6N0BK11 | USG-1 protein                                        | 0,14420 | 1,93566 | 0,17818 | 1,29821 | 0,15886 | 0,51150 |
| 325 | A0A6N0B6G0 | Cytosol non-specific dipeptidase                     | 0,01472 | 1,91633 | 0,08910 | 1,35383 | 0,62525 | 1,13157 |
| 326 | A0A6N0B675 | FKBP-type 22 kDa peptidyl-prolyl cis-trans isomerase | 0,97712 | 1,00595 | 0,00448 | 1,30077 | 0,13750 | 1,38382 |
| 327 | A0A6N0A9L8 | Cation efflux system protein CusB                    | 0,18276 | 1,14122 | 0,71205 | 1,05367 | 0,01514 | 0,85456 |
| 328 | A0A6N0B1Z6 | Dihydroorotate dehydrogenase (Quinone)               | 0,40745 | 0,76547 | 0,98304 | 1,00456 | 0,35401 | 1,29040 |
| 329 | A0A6N0AH46 | Chemotaxis protein CheW                              | 0,02691 | 0,44510 | 0,92289 | 1,00914 | 0,40672 | 1,28596 |
| 330 | A0A6N0AVD9 | 50S ribosomal protein L23                            | 0,02001 | 0,87243 | 0,00031 | 0,66029 | 0,02169 | 0,81983 |
| 331 | A0A6N0ADA5 | Threonine--tRNA ligase                               | 0,75877 | 0,92254 | 0,03685 | 1,40713 | 0,82398 | 1,06373 |
| 332 | A0A6N0BI00 | Transcriptional regulatory protein YycF              | 0,03727 | 1,12150 | 0,00010 | 0,63911 | 0,00103 | 0,71601 |
| 333 | A0A6N0B2Q9 | Ribosome-binding ATPase YchF                         | 0,72997 | 1,06465 | 0,01242 | 1,56206 | 0,06797 | 1,37402 |
| 334 | A0A6N0ARF4 | UTP--glucose-1-phosphate uridylyltransferase         | 0,16965 | 1,14980 | 0,06764 | 0,94609 | 0,19876 | 0,83164 |
| 335 | A0A6N0ADU5 | Universal stress protein E                           | 0,29578 | 0,76989 | 0,03203 | 0,41925 | 0,62262 | 0,92356 |
| 336 | A0A6N0ADF1 | Dihydroorotase                                       | 0,80795 | 1,13771 | 0,08242 | 2,20790 | 0,05514 | 1,57906 |
| 337 | A0A6N0B1S2 | S-(Hydroxymethyl)glutathione dehydrogenase           | 0,87075 | 0,94516 | 0,61583 | 0,83357 | 0,58528 | 1,10143 |
| 338 | A0A6N0BHM5 | Ribosome-associated inhibitor A                      | 0,00030 | 1,72749 | 0,00006 | 2,05232 | 0,00258 | 1,21412 |
| 339 | A0A6N0B1V3 | NADPH dehydrogenase                                  | 0,13922 | 1,36783 | 0,03122 | 0,41770 | 0,03482 | 0,67762 |
| 340 | A0A6N0AYU5 | Regulator of ribonuclease activity A                 | 0,41564 | 1,62280 | 0,81953 | 0,88822 | 0,93473 | 1,03075 |
| 341 | A0A6N0AJ31 | DNA gyrase subunit B                                 | 0,34967 | 1,49905 | 0,25479 | 1,82079 | 0,19085 | 1,37894 |
| 342 | A0A6N0B6D3 | L-aspartate oxidase                                  | 0,39059 | 0,92389 | 0,00914 | 0,65515 | 0,28697 | 0,87750 |
| 343 | A0A6N0BBM6 | 50S ribosomal protein L13                            | 0,15042 | 0,75988 | 0,12733 | 1,06745 | 0,22522 | 1,27016 |
| 344 | A0A6N0AIP1 | Chaperone protein DnaJ                               | 0,04031 | 1,35819 | 0,00483 | 1,69001 | 0,00329 | 1,22802 |
| 345 | A0A6N0ATU8 | ATP-dependent RNA helicase RhlB                      | 0,05389 | 1,42659 | 0,00217 | 1,99842 | 0,03240 | 1,30052 |
| 346 | A0A6N0A9T3 | Glyoxylate/hydroxypyruvate reductase B               | 0,91290 | 0,94919 | 0,05213 | 1,84229 | 0,32774 | 1,67296 |
| 347 | A0A6N0A6N3 | Protein-export protein SecB                          | 0,74080 | 1,14609 | 0,02348 | 1,83527 | 0,01388 | 2,28091 |
| 348 | A0A6N0B819 | Fructose-1,6-bisphosphatase class 1                  | 0,01228 | 1,41882 | 0,61096 | 0,93789 | 0,72409 | 0,95829 |
| 349 | A0A6N0ASW1 | Ribose-5-phosphate isomerase A                       | 0,66075 | 1,12546 | 0,12612 | 1,29415 | 0,75598 | 0,85831 |
| 350 | A0A6N0AH49 | Uncharacterized protein                              | 0,82852 | 1,06894 | 0,00320 | 2,65606 | 0,77669 | 1,10074 |
| 351 | A0A6N0AF66 | Phenylalanine--tRNA ligase alpha subunit             | 0,80580 | 0,77742 | 0,14286 | 2,16127 | 0,38854 | 2,25381 |
| 352 | A0A6N0AY01 | Mandelate racemase                                   | 0,68371 | 0,95375 | 0,00299 | 0,85355 | 0,60902 | 0,92849 |
| 353 | A0A6N0AYD1 | Uncharacterized protein                              | 0,32312 | 1,29511 | 0,36599 | 1,19790 | 0,84087 | 1,03107 |
| 354 | A0A6N0BHB7 | 50S ribosomal protein L17                            | 0,00037 | 0,88528 | 0,00107 | 0,70766 | 0,00006 | 0,83591 |

|     |            |                                                                                                    |         |         |         |         |         |         |
|-----|------------|----------------------------------------------------------------------------------------------------|---------|---------|---------|---------|---------|---------|
| 355 | A0A6N0ADJ5 | 3-oxoacyl-[acyl-carrier-protein] synthase 2                                                        | 0,25138 | 0,90686 | 0,00492 | 1,32536 | 0,00657 | 1,44036 |
| 356 | A0A6N0ADH1 | Hydroperoxy fatty acid reductase gpx1                                                              | 0,63042 | 1,04936 | 0,29357 | 0,89484 | 0,17740 | 0,87409 |
| 357 | A0A6N0BEQ9 | Acetyl-coenzyme A carboxylase carboxyl transferase subunit beta                                    | 0,15456 | 0,68085 | 0,01367 | 0,60784 | 0,78951 | 0,91222 |
| 358 | A0A6N0AIG5 | 5'-methylthioadenosine/S-adenosylhomocysteine nucleosidase                                         | 0,10040 | 1,25287 | 0,00964 | 1,45341 | 0,04459 | 1,25800 |
| 359 | A0A6N0BA21 | Glutamine--tRNA ligase                                                                             | 0,98083 | 1,00443 | 0,01866 | 1,42486 | 0,56405 | 1,11228 |
| 360 | A0A6N0AQ52 | 50S ribosomal protein L32                                                                          | 0,02939 | 0,46988 | 0,04731 | 0,56738 | 0,42621 | 1,37839 |
| 361 | A0A6N0ABU4 | Glucose-6-phosphate 1-epimerase                                                                    | 0,14066 | 1,46370 | 0,04757 | 1,62574 | 0,31858 | 1,19355 |
| 362 | A0A6N0BIF9 | 30S ribosomal protein S19                                                                          | 0,40715 | 1,18166 | 0,46672 | 0,82974 | 0,72534 | 1,05070 |
| 363 | A0A6N0BFA8 | Cytoskeleton protein RodZ                                                                          | 0,79101 | 0,93160 | 0,34487 | 0,81555 | 0,83943 | 1,05655 |
| 364 | A0A6N0B7R8 | Uroporphyrinogen-III C-methyltransferase                                                           | 0,00720 | 1,57176 | 0,03246 | 1,32131 | 0,25457 | 0,93686 |
| 365 | A0A6N0AIQ3 | UDP-N-acetylmuramoyl-L-alanyl-D-glutamate--2, 6-diaminopimelate ligase                             | 0,41966 | 0,67305 | 0,66795 | 0,83926 | 0,22633 | 1,24588 |
| 366 | A0A6N0BE41 | Uncharacterized protein                                                                            | 0,21779 | 1,21775 | 0,66065 | 1,07522 | 0,10172 | 0,84411 |
| 367 | A0A6N0B3P2 | Ureidoglycolate lyase                                                                              | 0,35003 | 0,84727 | 0,12329 | 0,73039 | 0,65995 | 0,95956 |
| 368 | A0A6N0BKZ5 | Uncharacterized protein                                                                            | 0,72246 | 1,04954 | 0,13224 | 1,24089 | 0,26011 | 0,91010 |
| 369 | A0A6N0A900 | ADP-L-glycero-D-manno-heptose-6-epimerase                                                          | 0,00643 | 1,27977 | 0,00597 | 1,33653 | 0,07261 | 1,07213 |
| 370 | A0A6N0BH40 | RNA-binding protein Hfq                                                                            | 0,53402 | 0,87615 | 0,13801 | 0,74459 | 0,86303 | 1,03400 |
| 371 | A0A6N0AXS8 | Cytochrome bo(3) ubiquinol oxidase subunit 2                                                       | 0,65117 | 0,84833 | 0,48385 | 1,21110 | 0,35265 | 1,33936 |
| 372 | A0A6N0AJ43 | Enamine/imine deaminase                                                                            | 0,83796 | 1,08177 | 0,65993 | 1,22671 | 0,39270 | 1,28965 |
| 373 | A0A6N0BDZ1 | NAD(P) transhydrogenase subunit alpha                                                              | 0,96766 | 0,98341 | 0,01803 | 0,55989 | 0,41855 | 1,61590 |
| 374 | A0A6N0B5Q4 | 3-isopropylmalate dehydratase small subunit 1                                                      | 0,62497 | 1,04477 | 0,08668 | 0,58843 | 0,00125 | 0,48681 |
| 375 | A0A6N0AF63 | 1-(5-phosphoribosyl)-5-[(5-phosphoribosylamino)methylideneamino] imidazole-4-carboxamide isomerase | 0,65646 | 1,10665 | 0,04000 | 1,51585 | 0,01122 | 1,63180 |
| 376 | A0A6N0B491 | Aerotaxis receptor                                                                                 | 0,43281 | 1,38242 | 0,90689 | 1,05439 | 0,88038 | 0,96975 |
| 377 | A0A6N0AT52 | Soluble cytochrome b562                                                                            | 0,08392 | 1,19495 | 0,00274 | 0,77545 | 0,27810 | 1,14425 |
| 378 | A0A6N0AT35 | DNA topoisomerase 1                                                                                | 0,07408 | 1,77409 | 0,02448 | 1,89071 | 0,72562 | 0,95037 |
| 379 | A0A6N0AG11 | Tail-specific protease                                                                             | 0,82696 | 0,94532 | 0,01174 | 1,31214 | 0,17397 | 1,39812 |
| 380 | A0A6N0B091 | 1,4-Dihydroxy-2-naphthoyl-CoA synthase                                                             | 0,01859 | 1,40543 | 0,00017 | 2,05315 | 0,30975 | 1,12996 |

|     |            |                                                        |         |         |         |         |         |         |
|-----|------------|--------------------------------------------------------|---------|---------|---------|---------|---------|---------|
| 381 | A0A6N0B404 | Enolase-phosphatase E1                                 | 0,34736 | 1,35522 | 0,64489 | 1,14188 | 0,72770 | 1,06306 |
| 382 | A0A6N0B1Y5 | Imidazole glycerol phosphate synthase subunit HisF     | 0,04466 | 1,10620 | 0,00251 | 0,72396 | 0,04315 | 0,83279 |
| 383 | A0A6N0AMJ7 | Phosphopentomutase                                     | 0,06539 | 1,50755 | 0,89339 | 0,98174 | 0,24806 | 0,63957 |
| 384 | A0A6N0AJ09 | Cystine-binding periplasmic protein                    | 0,84782 | 1,07388 | 0,81914 | 1,06621 | 0,35725 | 1,27744 |
| 385 | A0A6N0AKD8 | Thiol:disulfide interchange protein DsbA               | 0,00366 | 0,03661 | 0,11067 | 1,34972 | 0,15995 | 1,75839 |
| 386 | A0A6N0B884 | Small heat shock protein IbpB                          | 0,00386 | 0,75308 | 0,00000 | 0,38764 | 0,00082 | 0,51344 |
| 387 | A0A6N0BHM3 | Exoribonuclease 2                                      | 0,39907 | 1,31137 | 0,02316 | 2,04531 | 0,29459 | 1,19377 |
| 388 | A0A6N0BD16 | Methyl-accepting chemotaxis protein II                 | 0,32752 | 1,51733 | 0,28056 | 1,59300 | 0,12927 | 0,75295 |
| 389 | A0A6N0B252 | HIT-like protein                                       | 0,60464 | 1,07466 | 0,03003 | 0,85801 | 0,78497 | 0,94680 |
| 390 | A0A6N0AZT3 | Modulator of FtsH protease HflK                        | 0,43054 | 1,35703 | 0,08657 | 1,98096 | 0,52638 | 1,05390 |
| 391 | A0A6N0BIP4 | 30S ribosomal protein S20                              | 0,02823 | 0,50102 | 0,00483 | 0,40726 | 0,52353 | 0,84945 |
| 392 | A0A6N0AFS9 | 50S ribosomal protein L20                              | 0,29528 | 0,89281 | 0,01614 | 0,77607 | 0,07182 | 1,20613 |
| 393 | A0A6N0AJ59 | 30S ribosomal protein S9                               | 0,25031 | 0,86455 | 0,10461 | 1,11247 | 0,58685 | 1,08304 |
| 394 | A0A6N0AEN6 | Histidine--tRNA ligase                                 | 0,41102 | 0,94204 | 0,61370 | 1,06067 | 0,45529 | 1,07303 |
| 395 | A0A6N0AJY7 | 50S ribosomal protein L27                              | 0,80876 | 1,00705 | 0,00034 | 0,79024 | 0,48807 | 1,02011 |
| 396 | A0A6N0AJX9 | RNA polymerase sigma factor RpoD                       | 0,27638 | 0,63575 | 0,12026 | 1,18116 | 0,20289 | 1,68692 |
| 397 | A0A6N0BGU0 | 50S ribosomal protein L19                              | 0,02011 | 0,77748 | 0,00212 | 0,65708 | 0,04845 | 0,84837 |
| 398 | A0A6N0AUY7 | Homoserine kinase                                      | 0,00101 | 1,27401 | 0,00029 | 0,52724 | 0,00908 | 0,68724 |
| 399 | A0A6N0B7U0 | Catabolite repressor/activator                         | 0,46905 | 1,13625 | 0,94319 | 1,00343 | 0,14982 | 0,69827 |
| 400 | A0A2K8VYS8 | 50S ribosomal protein L18                              | 0,21390 | 0,56154 | 0,60237 | 0,80263 | 0,40550 | 0,85171 |
| 401 | A0A6N0AHE2 | Quinone oxidoreductase 1                               | 0,00704 | 1,70640 | 0,04056 | 1,44747 | 0,69726 | 0,96983 |
| 402 | A0A2K8VTM2 | Multifunctional fusion protein                         | 0,33441 | 1,46022 | 0,31766 | 1,51594 | 0,27461 | 1,44392 |
| 403 | A0A6N0AC03 | Glutathione S-transferase GstB                         | 0,67836 | 0,96907 | 0,00736 | 0,78296 | 0,09703 | 0,84943 |
| 404 | A0A6N0AH02 | Anaerobic glycerol-3-phosphate dehydrogenase subunit B | 0,44555 | 1,08236 | 0,02932 | 1,34314 | 0,23680 | 0,85053 |
| 405 | A0A6N0B307 | Glucose-6-phosphate 1-dehydrogenase                    | 0,30543 | 1,36500 | 0,15820 | 1,49221 | 0,67221 | 0,89664 |
| 406 | A0A6N0B2P8 | Uncharacterized protein                                | 0,76503 | 1,20465 | 0,33829 | 1,41584 | 0,36582 | 1,47314 |
| 407 | A0A6N0B7I1 | Uncharacterized protein                                | 0,08030 | 1,20407 | 0,11817 | 0,81827 | 0,09984 | 0,85917 |
| 408 | A0A6N0AJG4 | Single-stranded DNA-binding protein                    | 0,63195 | 0,97796 | 0,00001 | 0,68782 | 0,10736 | 0,87716 |
| 409 | A0A6N0AT13 | Carboxylesterase NlhH                                  | 0,90764 | 0,97512 | 0,00001 | 7,02314 | 0,00421 | 7,57025 |
| 410 | A0A6N0A8R2 | Penicillin-binding protein activator LpoA              | 0,24613 | 1,47365 | 0,00197 | 1,82825 | 0,28047 | 1,29253 |
| 411 | A0A6N0B3Z1 | Galactose-6-phosphate isomerase subunit LacB           | 0,11781 | 0,89758 | 0,00024 | 0,53754 | 0,00113 | 0,63563 |



|     |            |                                                           |         |         |         |         |         |         |
|-----|------------|-----------------------------------------------------------|---------|---------|---------|---------|---------|---------|
| 412 | A0A6N0AFC6 | TrmH family tRNA/rRNA methyltransferase                   | 0,64617 | 1,07753 | 0,39854 | 0,86869 | 0,09104 | 0,77257 |
| 413 | A0A6N0AGM0 | Organic hydroperoxide resistance protein OhrB             | 0,09839 | 3,16750 | 0,00389 | 6,85696 | 0,10624 | 1,80503 |
| 414 | A0A6N0AG15 | Cold shock-like protein CspC                              | 0,26046 | 1,01874 | 0,87155 | 0,99738 | 0,06033 | 0,93775 |
| 415 | A0A6N0A8K8 | Biotin carboxyl carrier protein of acetyl-CoA carboxylase | 0,03245 | 0,62300 | 0,15261 | 0,83737 | 0,90003 | 1,02591 |
| 416 | A0A6N0BHN6 | Signal recognition particle protein                       | 0,36176 | 0,68360 | 0,24091 | 0,71818 | 0,78105 | 0,86336 |
| 417 | A0A6N0AMQ7 | DNA-binding protein H-NS                                  | 0,25118 | 2,05519 | 0,01139 | 2,09078 | 0,77500 | 0,88215 |
| 418 | A0A6N0ACS3 | Pectin degradation repressor protein KdgR                 | 0,48284 | 0,98172 | 0,00309 | 1,22199 | 0,07347 | 1,12430 |
| 419 | A0A6N0BHG2 | Histidine biosynthesis bifunctional protein HisB          | 0,10659 | 1,99609 | 0,00234 | 2,52438 | 0,14404 | 1,41007 |
| 420 | A0A6N0AL19 | NAD(P)H-flavin reductase                                  | 0,01077 | 2,13966 | 0,91848 | 1,02944 | 0,10235 | 0,56386 |
| 421 | A0A6N0ACI7 | Translation initiation factor IF-3                        | 0,69123 | 1,06852 | 0,08804 | 1,21423 | 0,24601 | 1,16913 |
| 422 | A0A6N0B8Z5 | 50S ribosomal protein L30                                 | 0,06517 | 0,77994 | 0,81735 | 0,98022 | 0,10989 | 1,15046 |
| 423 | A0A6N0AH68 | Universal stress protein G                                | 0,38647 | 0,90937 | 0,13506 | 0,82704 | 0,04367 | 0,79126 |
| 424 | A0A6N0B5T5 | Peptidyl-prolyl cis-trans isomerase A                     | 0,24346 | 1,42609 | 0,92245 | 0,97142 | 0,62549 | 0,92956 |
| 425 | A0A6N0A9R0 | Molybdate-binding periplasmic protein                     | 0,25765 | 0,89181 | 0,98752 | 1,00114 | 0,03140 | 0,79899 |
| 426 | A0A6N0B2V1 | Flagellar hook protein FlgE                               | 0,00849 | 0,30426 | 0,36161 | 0,84854 | 0,26889 | 0,50927 |
| 427 | A0A6N0BLV3 | Uncharacterized protein                                   | 0,58655 | 0,82298 | 0,00217 | 1,92807 | 0,22693 | 1,56320 |
| 428 | A0A6N0BJ75 | 50S ribosomal protein L14                                 | 0,00847 | 0,83116 | 0,00004 | 0,70711 | 0,01974 | 0,83056 |
| 429 | A0A6N0AQX1 | Integration host factor subunit alpha                     | 0,34707 | 1,36404 | 0,01717 | 2,08931 | 0,76852 | 1,05921 |
| 430 | A0A6N0AFW1 | p-protein                                                 | 0,05280 | 2,77294 | 0,22156 | 1,95189 | 0,04599 | 0,87874 |
| 431 | A0A6N0BHE7 | 2-oxoglutarate amidase                                    | 0,94801 | 1,02134 | 0,75409 | 1,07814 | 0,95859 | 0,97913 |
| 432 | A0A6N0BLK7 | 2-hydroxy-3-oxopropionate reductase                       | 0,37697 | 1,11631 | 0,04464 | 1,23892 | 0,69774 | 1,03397 |
| 433 | A0A6N0ABX5 | Methyl-accepting chemotaxis protein III                   | 0,00426 | 0,56627 | 0,03495 | 0,60083 | 0,02724 | 0,33208 |
| 434 | A0A6N0AL97 | N-carbamoyl-D-amino acid hydrolase                        | 0,34431 | 1,05749 | 0,03779 | 1,08036 | 0,18625 | 1,12638 |
| 435 | A0A6N0AK76 | Putative acrylyl-CoA reductase AcuI                       | 0,64495 | 0,87693 | 0,00428 | 1,61795 | 0,22907 | 1,40990 |
| 436 | A0A2K8W2M6 | Protein GrpE                                              | 0,21424 | 1,14375 | 0,03684 | 0,73491 | 0,07136 | 0,84640 |
| 437 | A0A6N0BI05 | Phosphoadenosine phosphosulfate reductase                 | 0,41337 | 1,30675 | 0,79505 | 1,09491 | 0,07570 | 0,92510 |
| 438 | A0A6N0AZ21 | Transcription elongation factor GreA                      | 0,54393 | 0,95499 | 0,15058 | 1,12501 | 0,03989 | 1,17358 |
| 439 | A0A6N0AK09 | Ribosome-binding factor A                                 | 0,23679 | 0,67825 | 0,63817 | 0,91880 | 0,30363 | 1,41368 |
| 440 | A0A6N0ATH5 | Phosphoglycolate phosphatase                              | 0,10364 | 0,74580 | 0,07855 | 0,66358 | 0,53931 | 0,89359 |
| 441 | A0A6N0AI03 | Uncharacterized protein                                   | 0,06075 | 1,33360 | 0,34083 | 1,09237 | 0,10652 | 0,84464 |
| 442 | A0A6N0AD72 | Flavodoxin                                                | 0,25980 | 1,15339 | 0,25463 | 1,24539 | 0,05258 | 1,23099 |

|     |            |                                                           |         |         |         |         |         |         |
|-----|------------|-----------------------------------------------------------|---------|---------|---------|---------|---------|---------|
| 443 | A0A6N0B1V4 | Glutaredoxin-4                                            | 0,15551 | 1,35706 | 0,17351 | 0,66617 | 0,00347 | 0,70953 |
| 444 | A0A6N0BNE7 | Acetolactate synthase isozyme 2 large subunit             | 0,85925 | 0,95358 | 0,11157 | 0,74675 | 0,95094 | 1,03093 |
| 445 | A0A6N0B1J2 | tRNA-modifying protein YgfZ                               | 0,19966 | 1,27154 | 0,02989 | 0,46674 | 0,00624 | 0,58729 |
| 446 | A0A6N0AGY4 | Xanthine phosphoribosyltransferase                        | 0,72520 | 0,87221 | 0,43352 | 0,75059 | 0,76864 | 0,84086 |
| 447 | A0A6N0ALM2 | Uncharacterized protein                                   | 0,46964 | 1,23066 | 0,23241 | 1,17004 | 0,50722 | 1,15922 |
| 448 | A0A6N0AAN4 | Ferric aerobactin receptor                                | 0,30900 | 0,65199 | 0,45302 | 0,75207 | 0,01380 | 2,06469 |
| 449 | A0A6N0B792 | 2-aminoadipate transaminase                               | 0,94654 | 1,02640 | 0,62243 | 1,19432 | 0,01329 | 1,26888 |
| 450 | A0A6N0AST7 | Putative quorum-quenching lactonase YtnP                  | 0,86027 | 1,06343 | 0,30368 | 1,31066 | 0,87018 | 1,06117 |
| 451 | A0A6N0AVZ4 | N5-carboxyaminoimidazole ribonucleotide mutase            | 0,45119 | 0,88478 | 0,04053 | 1,17951 | 0,12009 | 1,54808 |
| 452 | A0A6N0B5W1 | Mannose permease IID component                            | 0,00080 | 0,69340 | 0,03375 | 1,08577 | 0,35643 | 1,05671 |
| 453 | A0A6N0B1N9 | Outer-membrane lipoprotein carrier protein                | 0,58631 | 1,23857 | 0,88593 | 0,94998 | 0,85507 | 0,93857 |
| 454 | A0A6N0AIQ5 | Stringent starvation protein A                            | 0,03857 | 0,91544 | 0,07658 | 0,92350 | 0,20661 | 1,08855 |
| 455 | A0A6N0ATA9 | Glutamate-1-semialdehyde 2,1-aminomutase                  | 0,43551 | 1,03065 | 0,01599 | 0,87222 | 0,11480 | 1,13540 |
| 456 | A0A6N0AH26 | Shikimate kinase 1                                        | 0,52437 | 0,82433 | 0,77298 | 0,97234 | 0,82612 | 1,06813 |
| 457 | A0A6N0B3Z7 | ProP effector                                             | 0,02328 | 0,89222 | 0,00375 | 0,83691 | 0,95325 | 0,99651 |
| 458 | A0A6N0AJL6 | Glucokinase                                               | 0,57978 | 1,09308 | 0,50678 | 1,04541 | 0,67617 | 1,06514 |
| 459 | A0A6N0BC52 | 6-phosphogluconolactonase                                 | 0,60501 | 0,88119 | 0,82455 | 1,02987 | 0,75117 | 1,07292 |
| 460 | A0A6N0ADW9 | Histidinol-phosphate aminotransferase                     | 0,50248 | 0,94595 | 0,42627 | 0,94980 | 0,78898 | 1,02383 |
| 461 | A0A6N0B4D0 | Periplasmic oligopeptide-binding protein                  | 0,02344 | 0,36843 | 0,15039 | 0,71945 | 0,58901 | 1,28595 |
| 462 | A0A6N0ABQ5 | Transcriptional regulatory protein RcsB                   | 0,02738 | 2,14519 | 0,09929 | 1,70599 | 0,59744 | 0,96288 |
| 463 | A0A6N0AFZ5 | Uncharacterized protein                                   | 0,00088 | 3,67179 | 0,00006 | 3,38437 | 0,10083 | 1,27090 |
| 464 | A0A6N0BK24 | FKBP-type peptidyl-prolyl cis-trans isomerase SlyD        | 0,04425 | 1,29521 | 0,00533 | 0,44161 | 0,00179 | 0,64666 |
| 465 | A0A6N0AHH6 | Outer membrane protein assembly factor BamD               | 0,00923 | 1,93433 | 0,00052 | 2,68198 | 0,59210 | 1,12189 |
| 466 | A0A6N0B906 | 50S ribosomal protein L29                                 | 0,70529 | 1,04678 | 0,03704 | 0,67049 | 0,01749 | 0,69684 |
| 467 | A0A6N0AGN0 | Uncharacterized protein                                   | 0,01103 | 0,56358 | 0,09898 | 1,15478 | 0,99274 | 1,00320 |
| 468 | A0A6N0AIP0 | Lipopolysaccharide export system ATP-binding protein LptB | 0,69987 | 1,06286 | 0,20177 | 0,94970 | 0,65799 | 0,92657 |
| 469 | A0A6N0AG71 | 2-C-methyl-D-erythritol 2,4-cyclodiphosphate synthase     | 0,36654 | 1,19272 | 0,00282 | 1,67700 | 0,06479 | 1,42250 |
| 470 | A0A6N0B4G5 | Lichenan-specific phosphotransferase enzyme IIB component | 0,43847 | 1,27942 | 0,85916 | 0,94268 | 0,25303 | 0,64050 |
| 471 | A0A6N0BFY8 | Tyrosine--tRNA ligase                                     | 0,25858 | 0,81469 | 0,42797 | 1,07699 | 0,03911 | 1,44343 |
| 472 | A0A6N0AGD3 | Uncharacterized protein                                   | 0,68557 | 1,17874 | 0,58442 | 0,71540 | 0,86375 | 0,98394 |

|     |            |                                                                   |         |         |         |         |         |         |
|-----|------------|-------------------------------------------------------------------|---------|---------|---------|---------|---------|---------|
| 473 | A0A6N0AEA5 | 3-hydroxydecanoyl-[acyl-carrier-protein] dehydratase              | 0,68050 | 1,25122 | 0,01238 | 2,95580 | 0,17527 | 1,91329 |
| 474 | A0A6N0BDC2 | Uncharacterized protein                                           | 0,01873 | 1,39954 | 0,04141 | 1,28244 | 0,78276 | 1,01816 |
| 475 | A0A6N0BGW6 | NifU-like protein                                                 | 0,15603 | 0,64142 | 0,02105 | 1,26610 | 0,52992 | 1,36387 |
| 476 | A0A6N0AKX6 | Coenzyme A biosynthesis bifunctional protein CoaBC                | 0,24637 | 1,61116 | 0,03800 | 2,63975 | 0,01016 | 1,95361 |
| 477 | A0A6N0BGK3 | Nitrogen regulatory protein P-II                                  | 0,77273 | 0,98429 | 0,00074 | 0,71039 | 0,09366 | 0,89774 |
| 478 | A0A6N0B685 | Glutathione S-transferase GstB                                    | 0,16516 | 1,78529 | 0,44634 | 1,39282 | 0,01760 | 0,76989 |
| 479 | A0A6N0B1L8 | Putative periplasmic iron-binding protein                         | 0,00245 | 2,62862 | 0,88847 | 1,05380 | 0,26436 | 1,10952 |
| 480 | A0A6N0AX31 | Deoxyuridine 5'-triphosphate nucleotidohydrolase                  | 0,57354 | 0,80857 | 0,20548 | 0,83702 | 0,82795 | 1,08500 |
| 481 | A0A6N0AJ23 | Glycine betaine-binding periplasmic protein                       | 0,02590 | 1,59379 | 0,34537 | 1,13119 | 0,01188 | 1,51087 |
| 482 | A0A6N0AFQ9 | Major outer membrane lipoprotein Lpp                              | 0,06689 | 0,72503 | 0,26554 | 0,92717 | 0,47552 | 0,87550 |
| 483 | A0A6N0A9K9 | Ferric uptake regulation protein                                  | 0,51590 | 1,21605 | 0,70006 | 1,06252 | 0,77908 | 1,07185 |
| 484 | A0A6N0BBK3 | Phosphocarrier protein HPr                                        | 0,08129 | 0,81151 | 0,02275 | 1,26387 | 0,14172 | 1,44375 |
| 485 | A0A6N0BAH2 | UDP-glucose 4-epimerase                                           | 0,00903 | 1,25713 | 0,00881 | 0,75569 | 0,00137 | 0,68486 |
| 486 | A0A6N0AU32 | Methylglyoxal synthase                                            | 0,41435 | 0,96014 | 0,00179 | 0,67252 | 0,00417 | 0,68694 |
| 487 | A0A6N0ATR4 | RNA polymerase-binding transcription factor DksA                  | 0,08817 | 0,67214 | 0,18912 | 1,16375 | 0,17965 | 1,35829 |
| 488 | A0A6N0AG70 | Molybdopterin adenylyltransferase                                 | 0,00356 | 1,36181 | 0,00353 | 1,35537 | 0,19963 | 1,05606 |
| 489 | A0A6N0AQY5 | Glutaredoxin-1                                                    | 0,15799 | 1,35210 | 0,00501 | 1,93892 | 0,03970 | 1,36575 |
| 490 | A0A6N0AZB8 | Bifunctional protein GlmU                                         | 0,08799 | 2,06858 | 0,00857 | 2,72209 | 0,60985 | 0,79799 |
| 491 | A0A6N0B0C3 | Histidinol dehydrogenase                                          | 0,00565 | 2,53859 | 0,00246 | 3,10964 | 0,24569 | 0,80253 |
| 492 | A0A6N0B1X7 | Ribosomal protein S12 methylthiotransferase accessory factor YcaO | 0,30444 | 1,49048 | 0,61907 | 1,14001 | 0,66836 | 0,88246 |
| 493 | A0A6N0BB83 | Elongation factor Tu                                              | 0,00116 | 3,94935 | 0,02239 | 3,20459 | 0,25836 | 1,12450 |
| 494 | A0A6N0AZJ6 | ATP-dependent Clp protease proteolytic subunit                    | 0,00110 | 1,81865 | 0,00032 | 2,06361 | 0,08735 | 1,11290 |
| 495 | A0A6N0BB99 | Putative L,D-transpeptidase YbiS                                  | 0,13448 | 1,55801 | 0,01197 | 2,50793 | 0,04543 | 1,58226 |
| 496 | A0A6N0AL09 | Ubiquinone/menaquinone biosynthesis C-methyltransferase UbiE      | 0,00521 | 0,66064 | 0,39653 | 0,94172 | 0,00036 | 1,47591 |
| 497 | A0A6N0AX80 | Phosphate-binding protein PstS                                    | 0,02142 | 2,65800 | 0,00130 | 4,45123 | 0,02257 | 1,43957 |
| 498 | A0A6N0AWQ4 | Cell division protein ZapB                                        | 0,11038 | 0,45473 | 0,18949 | 1,32742 | 0,00936 | 3,12950 |
| 499 | A0A6N0AIW6 | Coenzyme A disulfide reductase                                    | 0,04724 | 0,35641 | 0,54656 | 0,78919 | 0,17398 | 0,65480 |
| 500 | A0A6N0AWD5 | 30S ribosomal protein S21                                         | 0,29345 | 0,58992 | 0,96367 | 0,97464 | 0,67739 | 1,27398 |
| 501 | A0A6N0ATJ7 | 3-dehydroquinate synthase                                         | 0,07646 | 1,12111 | 0,01130 | 0,91483 | 0,07981 | 0,83928 |

|     |            |                                                              |         |         |         |         |         |         |
|-----|------------|--------------------------------------------------------------|---------|---------|---------|---------|---------|---------|
| 502 | A0A6N0BAA6 | 3,4-dihydroxy-2-butanone 4-phosphate synthase                | 0,36260 | 1,46403 | 0,39399 | 1,41421 | 0,70819 | 1,04859 |
| 503 | A0A6N0AAD4 | Putative phospholipid-binding protein MlaC                   | 0,73784 | 1,14305 | 0,87022 | 1,04351 | 0,69072 | 0,83124 |
| 504 | A0A6N0AV98 | UDP-N-acetylmuramoyl-tripeptide--D-alanyl-D-alanine ligase   | 0,17324 | 2,47346 | 0,00253 | 3,66318 | 0,83605 | 1,10558 |
| 505 | A0A6N0AEH1 | Uncharacterized protein                                      | 0,02334 | 0,49759 | 0,05702 | 0,52897 | 0,66455 | 0,85597 |
| 506 | A0A6N0AC56 | Uncharacterized protein                                      | 0,22020 | 1,27319 | 0,05671 | 1,49145 | 0,35108 | 1,23309 |
| 507 | A0A6N0AX27 | Alpha-D-glucose-1-phosphate phosphatase YihX                 | 0,01234 | 1,45679 | 0,20772 | 1,36614 | 0,13950 | 0,87109 |
| 508 | A0A6N0BBL6 | Putative phospholipid ABC transporter-binding protein MlaD   | 0,08919 | 1,88724 | 0,11465 | 2,04519 | 0,60063 | 1,13838 |
| 509 | A0A6N0ACP0 | Galactose/methyl galactoside import ATP-binding protein MglA | 0,36230 | 0,55568 | 0,97401 | 1,01248 | 0,49298 | 1,63375 |
| 510 | A0A6N0BJF2 | Acetolactate synthase isozyme 3 small subunit                | 0,23084 | 0,78496 | 0,11853 | 0,86875 | 0,56061 | 1,13243 |
| 511 | A0A6N0BAN9 | 30S ribosomal protein S12                                    | 0,35102 | 0,63804 | 0,20854 | 1,50214 | 0,96044 | 1,04526 |
| 512 | A0A6N0AGF1 | Putative L,D-transpeptidase YcfS                             | 0,26337 | 0,65882 | 0,17407 | 0,68046 | 0,87768 | 1,06954 |
| 513 | A0A6N0B721 | Mannose-1-phosphate guanylyltransferase 1                    | 0,26352 | 1,39471 | 0,69030 | 0,91702 | 0,22711 | 0,72221 |
| 514 | A0A6N0AJG1 | D-ribose-binding periplasmic protein                         | 0,00724 | 0,84927 | 0,46102 | 1,02431 | 0,84673 | 0,99652 |
| 515 | A0A6N0AZI4 | Putative Fe(2+)-trafficking protein                          | 0,51913 | 1,06941 | 0,01449 | 0,42374 | 0,06272 | 0,70725 |
| 516 | A0A6N0AA70 | 50S ribosomal protein L33                                    | 0,08594 | 0,58821 | 0,00779 | 1,73184 | 0,93280 | 1,05013 |
| 517 | A0A6N0AYH2 | Fe/S biogenesis protein NfuA                                 | 0,06323 | 1,17510 | 0,28303 | 0,89612 | 0,79718 | 0,98241 |
| 518 | A0A6N0AFZ8 | Cell division topological specificity factor                 | 0,28817 | 1,35506 | 0,77954 | 0,91318 | 0,00433 | 0,71302 |
| 519 | A0A6N0B970 | Glycerol uptake facilitator protein                          | 0,77020 | 0,96368 | 0,09106 | 0,75395 | 0,24837 | 0,86398 |
| 520 | A0A6N0AM30 | Glycerol-3-phosphate acyltransferase                         | 0,15542 | 0,54472 | 0,14368 | 0,61174 | 0,45812 | 1,33593 |
| 521 | A0A6N0ANJ7 | 3-phosphoshikimate 1-carboxyvinyltransferase                 | 0,41598 | 0,91896 | 0,00393 | 0,66454 | 0,21192 | 0,69156 |
| 522 | A0A6N0AS92 | GTPase Era                                                   | 0,65420 | 1,23591 | 0,54330 | 1,17819 | 0,26997 | 1,59968 |
| 523 | A0A6N0B3V9 | PTS system glucose-specific EIICB component                  | 0,43608 | 1,45713 | 0,78444 | 1,10427 | 0,66788 | 0,82466 |
| 524 | A0A2K8VTW3 | Uncharacterized protein                                      | 0,62556 | 1,32901 | 0,00087 | 5,90742 | 0,85526 | 0,87251 |
| 525 | A0A6N0AY64 | Spheroplast protein Y                                        | 0,87053 | 0,88314 | 0,03093 | 2,98408 | 0,39612 | 1,64589 |
| 526 | A0A6N0BF10 | Quinone oxidoreductase 2                                     | 0,01670 | 0,65287 | 0,07469 | 0,82348 | 0,01340 | 0,60870 |
| 527 | A0A6N0B2A0 | Uridylate kinase                                             | 0,02489 | 1,25067 | 0,03353 | 0,79208 | 0,00975 | 0,75226 |
| 528 | A0A6N0AMJ6 | Arsenate reductase                                           | 0,06337 | 1,26213 | 0,01831 | 1,19730 | 0,15099 | 0,79784 |
| 529 | A0A6N0AI24 | Phosphoheptose isomerase                                     | 0,82725 | 1,04233 | 0,44919 | 0,87103 | 0,53550 | 1,09790 |

|     |            |                                                   |         |          |         |         |         |         |
|-----|------------|---------------------------------------------------|---------|----------|---------|---------|---------|---------|
| 530 | A0A6N0BL41 | ATP synthase epsilon chain                        | 0,37679 | 1,38136  | 0,81726 | 0,91889 | 0,98863 | 0,99604 |
| 531 | A0A6N0BKR0 | Acetolactate synthase isozyme 1 large subunit     | 0,28172 | 2,75979  | 0,34189 | 1,99013 | 0,68961 | 0,76229 |
| 532 | A0A6N0BFT5 | T-protein                                         | 0,71645 | 0,88931  | 0,59862 | 0,83790 | 0,57314 | 1,16380 |
| 533 | A0A2K8VWM7 | Inositol-1-monophosphatase                        | 0,00041 | 5,56546  | 0,04252 | 2,02630 | 0,01656 | 0,56553 |
| 534 | A0A6N0AF86 | ATP-dependent RNA helicase SrmB                   | 0,00837 | 1,62290  | 0,73902 | 1,05927 | 0,40198 | 0,92614 |
| 535 | A0A6N0ANF2 | Protein-export membrane protein SecF              | 0,97164 | 1,00271  | 0,34480 | 1,05220 | 0,17349 | 1,11245 |
| 536 | A0A6N0AWF8 | Uncharacterized protein                           | 0,22423 | 1,73269  | 0,30700 | 1,53521 | 0,64875 | 1,13721 |
| 537 | A0A6N0BKV8 | Iron-sulfur cluster insertion protein ErpA        | 0,79648 | 0,95906  | 0,38134 | 0,91985 | 0,55382 | 0,85395 |
| 538 | A0A6N0AHH4 | Elongation factor 4                               | 0,41768 | 0,59545  | 0,58821 | 1,17018 | 0,16002 | 2,42501 |
| 539 | A0A6N0AX39 | Acetyl esterase                                   | 0,37306 | 0,63671  | 0,09783 | 0,37046 | 0,18837 | 0,46326 |
| 540 | A0A6N0AVB8 | Elongation factor P                               | 0,45051 | 0,81337  | 0,64954 | 1,05641 | 0,49298 | 1,18457 |
| 541 | A0A6N0ACV6 | Putative methyltransferase YcgJ                   | 0,06105 | 0,74068  | 0,43047 | 1,04669 | 0,10265 | 1,28414 |
| 542 | A0A6N0BFL7 | Tautomerase PptA                                  | 0,67553 | 1,10047  | 0,22808 | 1,29030 | 0,42161 | 1,22947 |
| 543 | A0A6N0B8R8 | Ribulose-phosphate 3-epimerase                    | 0,02785 | 10,81319 | 0,00003 | 9,32933 | 0,76915 | 1,14017 |
| 544 | A0A6N0B0H6 | Putative phosphatase YcdX                         | 0,29699 | 1,12194  | 0,07502 | 0,76763 | 0,12258 | 0,82343 |
| 545 | A0A6N0A9G2 | 7-cyano-7-deazaguanine synthase                   | 0,37767 | 1,43775  | 0,44415 | 1,35700 | 0,12166 | 1,31798 |
| 546 | A0A6N0AFF8 | FMN-dependent NADPH-azoreductase                  | 0,79506 | 0,83402  | 0,57896 | 0,69721 | 0,77584 | 1,13984 |
| 547 | A0A6N0BI27 | Glucarate dehydratase                             | 0,20904 | 0,70865  | 0,00004 | 0,74979 | 0,72093 | 0,83943 |
| 548 | A0A6N0BJQ5 | Spermidine synthase                               | 0,62122 | 0,68482  | 0,01702 | 3,23428 | 0,00556 | 3,03861 |
| 549 | A0A6N0BGD6 | Amidophosphoribosyltransferase                    | 0,00984 | 0,40784  | 0,30077 | 1,24398 | 0,17002 | 1,67002 |
| 550 | A0A6N0BHW6 | 50S ribosomal protein L31                         | 0,00888 | 0,72476  | 0,01704 | 0,77384 | 0,01879 | 1,19586 |
| 551 | A0A6N0AD76 | Uncharacterized protein                           | 0,98095 | 0,99291  | 0,16934 | 0,67364 | 0,57071 | 0,85351 |
| 552 | A0A6N0AKV1 | Cytochrome bo(3) ubiquinol oxidase subunit 1      | 0,04524 | 2,87773  | 0,13331 | 3,27770 | 0,09351 | 1,46849 |
| 553 | A0A6N0AGW8 | 30S ribosomal protein S17                         | 0,22245 | 0,62088  | 0,17085 | 1,29880 | 0,73173 | 1,19377 |
| 554 | A0A6N0BAJ3 | 30S ribosomal protein S14                         | 0,55180 | 0,89190  | 0,06552 | 0,58059 | 0,00002 | 0,76389 |
| 555 | A0A6N0ABD4 | Multiphosphoryl transfer protein                  | 0,82514 | 0,92000  | 0,18499 | 1,14656 | 0,84863 | 0,91754 |
| 556 | A0A6N0AHR7 | ADP compounds hydrolase NudE                      | 0,54237 | 1,38445  | 0,42551 | 1,40033 | 0,97102 | 1,01718 |
| 557 | A0A6N0BDL9 | Exodeoxyribonuclease III                          | 0,18640 | 1,42980  | 0,04352 | 1,77353 | 0,52606 | 1,17343 |
| 558 | A0A6N0B783 | 23S rRNA (Guanosine-2'-O-)-methyltransferase RlmB | 0,00245 | 1,33723  | 0,00424 | 1,33711 | 0,71401 | 1,02591 |
| 559 | A0A6N0BJ27 | Uncharacterized protein                           | 0,68363 | 0,73039  | 0,24267 | 1,84068 | 0,04398 | 0,58869 |
| 560 | A0A6N0APE9 | Uncharacterized protein                           | 0,04804 | 0,14509  | 0,47446 | 0,76015 | 0,49509 | 1,34629 |

|     |            |                                                      |         |         |         |         |         |         |
|-----|------------|------------------------------------------------------|---------|---------|---------|---------|---------|---------|
| 561 | A0A6N0BHP8 | Ferritin-1                                           | 0,44706 | 1,40105 | 0,06624 | 2,49764 | 0,25142 | 1,99477 |
| 562 | A0A6N0ALF5 | DNA topoisomerase 4 subunit B                        | 0,30861 | 6,01317 | 0,29093 | 1,87212 | 0,34197 | 0,22711 |
| 563 | A0A6N0B5T4 | NADH-quinone oxidoreductase subunit I                | 0,50269 | 0,92485 | 0,15838 | 0,78101 | 0,19833 | 0,93596 |
| 564 | A0A6N0BHV7 | Bifunctional protein TrpGD                           | 0,16695 | 3,52327 | 0,00195 | 3,63899 | 0,98242 | 0,99001 |
| 565 | A0A6N0ARD4 | Uncharacterized protein                              | 0,14678 | 0,92002 | 0,71704 | 1,01617 | 0,10269 | 1,08282 |
| 566 | A0A6N0B4E7 | Methyl-accepting chemotaxis protein II               | 0,06872 | 0,52886 | 0,08908 | 0,67265 | 0,65725 | 0,85199 |
| 567 | A0A6N0ANR3 | 30S ribosomal protein S15                            | 0,10136 | 0,25157 | 0,72981 | 0,86783 | 0,31935 | 2,10655 |
| 568 | A0A6N0BJD2 | 4-hydroxy-3-methylbut-2-en-1-yl diphosphate synthase | 0,01240 | 0,51574 | 0,00271 | 0,19400 | 0,81797 | 1,07944 |
| 569 | A0A6N0AT58 | NADP-dependent 3-hydroxy acid dehydrogenase YdfG     | 0,96036 | 0,98750 | 0,37734 | 1,10278 | 0,07314 | 0,36335 |
| 570 | A0A6N0BG76 | Protease HtpX                                        | 0,01342 | 1,25365 | 0,00059 | 0,66913 | 0,00160 | 0,66237 |
| 571 | A0A6N0ARZ3 | Osmotically-inducible lipoprotein E                  | 0,76649 | 1,21581 | 0,03713 | 2,93218 | 0,88881 | 1,08759 |
| 572 | A0A6N0AP09 | Septum site-determining protein MinC                 | 0,09629 | 1,36193 | 0,50332 | 0,96387 | 0,12076 | 0,75846 |
| 573 | A0A6N0BLZ3 | L-threonine dehydratase biosynthetic IlvA            | 0,27095 | 0,71093 | 0,81915 | 0,95478 | 0,17661 | 1,68073 |
| 574 | A0A6N0AU11 | Multiple stress resistance protein BhsA              | 0,86346 | 1,03958 | 0,29712 | 1,25251 | 0,00210 | 1,73790 |
| 575 | A0A6N0BHA3 | GTPase Der                                           | 0,58415 | 0,87613 | 0,24484 | 1,18669 | 0,75559 | 1,11496 |
| 576 | A0A6N0AAI8 | Proton glutamate symport protein                     | 0,00273 | 0,85443 | 0,00084 | 1,50428 | 0,00003 | 1,35630 |
| 577 | A0A6N0AZD1 | L-asparaginase                                       | 0,02597 | 0,17964 | 0,38753 | 1,22793 | 0,25328 | 2,01876 |
| 578 | A0A6N0AQA1 | Flagellar motor switch protein FlhM                  | 0,09154 | 0,59109 | 0,26552 | 0,76298 | 0,01085 | 0,56247 |
| 579 | A0A6N0B8Y3 | Putative amino-acid import ATP-binding protein YxeO  | 0,07565 | 1,76359 | 0,38749 | 1,64191 | 0,04530 | 0,48199 |
| 580 | A0A6N0BEU4 | Long-chain fatty acid transport protein              | 0,93239 | 1,02089 | 0,13034 | 0,74218 | 0,45313 | 0,83250 |
| 581 | A0A6N0AX25 | Uncharacterized protein                              | 0,69849 | 1,07711 | 0,44466 | 0,82814 | 0,39968 | 0,94597 |
| 582 | A0A6N0ARP4 | Glutamate-pyruvate aminotransferase AlaC             | 0,30122 | 2,35921 | 0,02905 | 2,41334 | 0,66334 | 1,22792 |
| 583 | A0A6N0AK88 | Nitrogen regulatory protein                          | 0,69502 | 1,08894 | 0,62907 | 0,90488 | 0,89391 | 1,02371 |
| 584 | A0A6N0BIX0 | Siroheme synthase                                    | 0,08362 | 2,42642 | 0,11506 | 2,26844 | 0,43603 | 0,93216 |
| 585 | A0A6N0ADK4 | Outer membrane protein W                             | 0,04650 | 0,46623 | 0,00088 | 1,55220 | 0,36061 | 1,47321 |
| 586 | A0A6N0AVY3 | Soluble pyridine nucleotide transhydrogenase         | 0,22409 | 0,83490 | 0,00591 | 0,59844 | 0,99802 | 0,99967 |
| 587 | A0A6N0B1T1 | Orotidine 5'-phosphate decarboxylase                 | 0,06900 | 1,24379 | 0,96429 | 1,00378 | 0,08788 | 0,84636 |
| 588 | A0A6N0AF08 | D-alanyl-D-alanine carboxypeptidase DacC             | 0,30413 | 1,29422 | 0,58403 | 0,87794 | 0,23095 | 0,66411 |
| 589 | A0A6N0B5I8 | 3-methyl-2-oxobutanoate hydroxymethyltransferase     | 0,03936 | 0,76224 | 0,00285 | 0,48424 | 0,00575 | 0,64889 |
| 590 | A0A6N0BNB2 | Signal recognition particle receptor FtsY            | 0,35862 | 0,60673 | 0,19132 | 0,42663 | 0,07954 | 2,44624 |
| 591 | A0A6N0BI16 | 50S ribosomal protein L35                            | 0,02136 | 1,36074 | 0,55123 | 0,94273 | 0,08025 | 1,10507 |



|     |            |                                                 |         |         |         |         |         |         |
|-----|------------|-------------------------------------------------|---------|---------|---------|---------|---------|---------|
| 592 | A0A6N0BHR4 | UDP-N-acetylmuramate--L-alanine ligase          | 0,00601 | 2,98271 | 0,00420 | 2,68635 | 0,88895 | 1,01415 |
| 593 | A0A6N0ALX1 | Peptide chain release factor 3                  | 0,15576 | 4,15470 | 0,00573 | 3,08292 | 0,53156 | 1,33255 |
| 594 | A0A6N0AE66 | Putative phospholipid-binding lipoprotein MlaA  | 0,66843 | 0,89323 | 0,58271 | 1,13170 | 0,16147 | 1,24500 |
| 595 | A0A6N0BEQ1 | Uncharacterized protein                         | 0,62366 | 1,09417 | 0,01359 | 1,60475 | 0,20943 | 1,19219 |
| 596 | A0A6N0APA5 | Magnesium and cobalt efflux protein CorC        | 0,80510 | 1,07134 | 0,13008 | 1,40777 | 0,50343 | 1,12152 |
| 597 | A0A6N0B959 | Uncharacterized protein                         | 0,24485 | 1,28136 | 0,65006 | 0,89804 | 0,88814 | 1,01113 |
| 598 | A0A6N0B929 | 5-keto-4-deoxy-D-glucarate aldolase             | 0,02295 | 0,77145 | 0,00983 | 0,60049 | 0,09169 | 0,78501 |
| 599 | A0A6N0B7U2 | 4-hydroxythreonine-4-phosphate dehydrogenase    | 0,59655 | 0,74988 | 0,65518 | 0,79075 | 0,84951 | 1,03387 |
| 600 | A0A6N0AKW3 | Glutathione reductase                           | 0,35856 | 0,54027 | 0,82273 | 0,91233 | 0,47154 | 1,52594 |
| 601 | A0A6N0AC48 | UDP-glucose 4-epimerase                         | 0,18584 | 0,53510 | 0,22875 | 0,56051 | 0,40973 | 1,39544 |
| 602 | A0A6N0AFL0 | UvrABC system protein A                         | 0,05764 | 1,93109 | 0,37541 | 0,56431 | 0,87830 | 0,92307 |
| 603 | A0A6N0B7F9 | Delta-aminolevulinic acid dehydratase           | 0,28425 | 1,19090 | 0,14402 | 0,67852 | 0,39547 | 0,93883 |
| 604 | A0A6N0B1Y6 | Phosphoenolpyruvate synthase regulatory protein | 0,85885 | 0,95119 | 0,64440 | 0,88961 | 0,25783 | 0,78301 |
| 605 | A0A6N0BG84 | Monooxygenase YcnE                              | 0,23724 | 1,45877 | 0,18009 | 0,51759 | 0,08324 | 0,63592 |
| 606 | A0A6N0B8Y8 | Ribulokinase                                    | 0,08996 | 2,33516 | 0,18764 | 1,90142 | 0,17698 | 1,45109 |
| 607 | A0A6N0AWG0 | S-adenosylmethionine decarboxylase proenzyme    | 0,02534 | 2,08286 | 0,59349 | 1,16917 | 0,40153 | 0,67834 |
