# Supplementary material for: The Periplasmic Oxidoreductase DsbA Is Required for Virulence of the Phytopathogen Dickeya solani
Source: Int J Mol Sci. 2022 Jan 9;23(2):697. doi: 10.3390/ijms23020697 (PMC8775594; doi:10.3390/ijms23020697)
Supplement: Supplementary file 1 [file ijms-23-00697-s001.zip]

Archive with 4 entries (4 files):
- ijms-1504896 suppl figures.pdf
- supplemenatry table caption.pdf
- Table_S1.pdf
- Table_S2.pdf
